# Supplementary material for: Development of a screening tool to predict the risk of chronic pain and disability following musculoskeletal trauma: protocol for a prospective observational study in the United Kingdom
Source: PubMed Central journal article supplement (PMC5931282; doi:10.1136/bmjopen-2017-017876), 2018-04-28
Supplement: bmjopen-2017-017876.draft_revisions.pdf [file bmjopen-2017-017876.draft_revisions.pdf]

# BMJ Open

BMJ Open is committed to open peer review. As part of this commitment we make the peer review history of every article we publish publicly available.

When an article is published we post the peer reviewers' comments and the authors' responses online. We also post the versions of the paper that were used during peer review. These are the versions that the peer review comments apply to.

The versions of the paper that follow are the versions that were submitted during the peer review process. They are not the versions of record or the final published versions. They should not be cited or distributed as the published version of this manuscript.

BMJ Open is an open access journal and the full, final, typeset and author-corrected version of record of the manuscript is available on our site with no access controls, subscription charges or pay-per-view fees (<http://bmjopen.bmj.com>).

If you have any questions on BMJ Open's open peer review process please email [info.bmjopen@bmj.com](mailto:info.bmjopen@bmj.com)

# BMJ Open

## DEVELOPMENT OF A PROGNOSTIC SCREENING TOOL TO PREDICT THE RISK OF CHRONIC PAIN AND DISABILITY FOLLOWING MUSCULOSKELETAL TRAUMA: PROTOCOL FOR A PROSPECTIVE OBSERVATIONAL STUDY

|                               |                                                                                                                                                                                                                                                                                                                                                                                                                                                                                                                   |
|-------------------------------|-------------------------------------------------------------------------------------------------------------------------------------------------------------------------------------------------------------------------------------------------------------------------------------------------------------------------------------------------------------------------------------------------------------------------------------------------------------------------------------------------------------------|
| Journal:                      | <i>BMJ Open</i>                                                                                                                                                                                                                                                                                                                                                                                                                                                                                                   |
| Manuscript ID                 | bmjopen-2017-017876                                                                                                                                                                                                                                                                                                                                                                                                                                                                                               |
| Article Type:                 | Protocol                                                                                                                                                                                                                                                                                                                                                                                                                                                                                                          |
| Date Submitted by the Author: | 25-May-2017                                                                                                                                                                                                                                                                                                                                                                                                                                                                                                       |
| Complete List of Authors:     | Rushton, Alison; University of Birmingham, School of Sport, Exercise and Rehabilitation Sciences<br>Evans, David; University of Birmingham, School of Sport, Exercise and Rehabilitation Sciences<br>Middlebrook, Nicola; University of Birmingham, School of Sport, Exercise and Rehabilitation Sciences<br>Heneghan, Nicola; University of Birmingham, School of Sport, Exercise and Rehabilitation Sciences<br>Falla, Deborah; University of Birmingham, School of Sport, Exercise and Rehabilitation Sciences |
| Keywords:                     | Musculoskeletal trauma, Precision rehabilitation, Pain mechanisms                                                                                                                                                                                                                                                                                                                                                                                                                                                 |
|                               |                                                                                                                                                                                                                                                                                                                                                                                                                                                                                                                   |

SCHOLARONE™  
Manuscripts

Peer Review Only

**TITLE PAGE****DEVELOPMENT OF A PROGNOSTIC SCREENING TOOL TO PREDICT THE RISK OF CHRONIC PAIN AND DISABILITY FOLLOWING MUSCULOSKELETAL TRAUMA: PROTOCOL FOR A PROSPECTIVE OBSERVATIONAL STUDY**

Rushton A<sup>1,2</sup>, Evans DW<sup>1,2</sup>, Middlebrook N<sup>1,2</sup>, Heneghan N<sup>1</sup>, Falla D<sup>1,2</sup>.

**Affiliations**

<sup>1</sup> Centre of Precision Rehabilitation for Spinal Pain  
School of Sport, Exercise and Rehabilitation Sciences  
College of Life and Environmental Sciences  
University of Birmingham  
Edgbaston  
Birmingham  
B15 2TT  
United Kingdom

<sup>2</sup> NIHR Surgical Reconstruction & Microbiology Research Centre  
University of Birmingham  
Edgbaston  
Birmingham  
B15 2TT  
United Kingdom

**Correspondence:**

Professor Deborah Falla  
Centre of Precision Rehabilitation for Spinal Pain  
School of Sport, Exercise and Rehabilitation Sciences,  
College of Life and Environmental Sciences,  
University of Birmingham,  
Birmingham, B15 2TT, UK.  
Tel: +44 121 415 4220  
Email: d.falla@bham.ac.uk

## 1 **ABSTRACT**

### 2 **Introduction**

3 Pain is an expected and appropriate experience following traumatic musculoskeletal injury.  
4 By contrast, chronic pain and disability are unhelpful yet common sequelae of trauma-related  
5 injuries. Presently, the mechanisms that underlie the transition from acute to chronic  
6 disabling post-traumatic pain are not fully understood. Such knowledge would facilitate the  
7 development and implementation of precision rehabilitation approaches that match  
8 interventions to projected risk of recovery, with the aim of preventing poor long-term  
9 outcomes. The aim of this study is to identify a set of prognostic factors to identify patients at  
10 risk of developing ongoing post-traumatic pain and disability following acute  
11 musculoskeletal trauma. To achieve this, we will use a unique and comprehensive  
12 combination of patient-reported outcome measures, psychophysical testing and biomarkers.

### 14 **Methods/analysis**

15 A prospective observational study will recruit two temporally staggered cohorts [n=250 each  
16 cohort; at least 10 cases per candidate predictor] of consecutive acute musculoskeletal trauma  
17 patients aged  $\geq 16$  years, who are emergency admissions into a Major Trauma Centre in the  
18 United Kingdom, with an episode inception defined as the traumatic event. The first cohort  
19 will identify prognostic factors to develop a screening tool to predict development of chronic  
20 and disabling pain, and the second will allow evaluation of the predictive performance of the  
21 tool [validation]. The outcome being predicted is an individual's absolute risk of poor  
22 outcome measured at 6 months follow-up using the Chronic Pain Grade Scale [poor outcome  
23  $\geq$ Grade II]. Candidate predictors encompass the four primary mechanisms of pain:  
24 *nociceptive* [e.g. injury location], *neuropathic* [e.g. painDETECT], *inflammatory*  
25 [biomarkers], and *central hypersensitivity* [e.g. quantitative sensory testing]. Concurrently,

1 patient-reported outcome measures will assess general health and psychosocial factors [e.g.  
2 Pain Self-Efficacy]. Risk of poor outcome will be calculated using multiple variable  
3 regression analysis.

## 4

### 5 **Ethics and dissemination**

6  
7 NHS Research Ethics Committee and institutional R&D approval are in progress.

### 8

#### 9 Keywords

10 Keywords: Pain mechanisms, Precision rehabilitation, Musculoskeletal trauma

11  
12 Funding: NIHR SRMRC

#### 13

#### 14 Word count

15 3169 [excluding tables]

## STRENGTHS AND LIMITATIONS OF THIS STUDY

- A comprehensive array of outcome measures will allow the development and validation of a prognostic tool to predict development of chronic and disabling pain following trauma
- Identifying prognostic factors related to poor outcome of pain and disability outcome will facilitate targeting of effective interventions
- The prospective design of the study enables control of unwarranted influences, and enables a stronger case for inferring causal relationships
- Other candidate predictors may have been useful to include [e.g. microRNA biomarkers], but their mechanistic functions and temporal progression are not yet sufficiently clear to justify their use

## INTRODUCTION

Pain is an expected and appropriate experience that usually follows traumatic injury.<sup>1</sup> By contrast, chronic pain and disability are unhelpful but common sequelae of trauma-related injuries.<sup>2</sup> Gaining an understanding of why some people develop chronic and disabling post-traumatic pain is therefore a priority for individual patients, the military and society at large. Notwithstanding, the mechanisms that underlie the transition from acute to chronic disabling post-traumatic pain are not fully understood. Such knowledge would facilitate the development and implementation of a clinical pathway of care that matches interventions to projected risk of poor recovery, with the aim of preventing poor long-term outcomes. This project stems from advances in knowledge relating to the assessment and management of pain<sup>3</sup> and the quantification of potential prognostic factors to inform personalised rehabilitation.

Few studies have specifically explored prognostic factors for recovery, whether poor or good, following physical trauma. Of those that have, psychosocial variables, such as anxiety, depression and post-traumatic stress, have so far been identified as the strongest predictors of outcome.<sup>4-7</sup> However, only a limited number of variables have hitherto been evaluated as potential prognostic factors. Indeed, current opinion regarding pain mechanisms<sup>8</sup> suggests that the development of chronic pain and disability cannot be entirely attributable to psychosocial factors. This is consistent with research in primary care that has identified prognostic factors for poor outcome across a range of musculoskeletal pain conditions<sup>9</sup>, which include: widespread pain, high functional disability, high pain intensity, long pain duration, high depression/anxiety, presence of previous pain episodes, movement restriction, and poor coping strategies. Moreover, developments in the mechanistic understanding of

1  
2  
3 pain<sup>10-12</sup> suggest that other measures [e.g. indicators of central sensitisation, inflammatory  
4 activity] may have potential predictive utility, especially in an acute trauma population.  
5  
6  
7

## 8 9 **Aims of study**

10  
11  
12  
13 Using a unique combination of: 1) established self-report questionnaires, including  
14 measures of pain characteristics, post-traumatic stress, depression and anxiety,  
15 catastrophizing, fear of movement, quality of life and self-efficacy; 2) premorbid  
16 neuropsychobiological status; together with 3) psychophysical methods to quantify current  
17 physical functioning, and indicators of active pain-related mechanisms; we aim to find a set  
18 of prognostic factors to identify patients at risk of developing ongoing post-traumatic pain  
19 and disability following acute musculoskeletal trauma. This will subsequently inform the  
20 feasibility of developing and evaluating a new clinical care pathway of precision  
21 rehabilitation [targeted management] that matches interventions to the predicted risk of poor  
22 recovery.  
23  
24  
25  
26  
27  
28  
29  
30  
31  
32  
33  
34  
35  
36

## 37 **Objectives**

- 38  
39  
40  
41 1) Identify prognostic factors for poor outcome [chronic pain and disability at 6-months post-  
42 injury] following acute musculoskeletal trauma.  
43  
44 2) Develop a predictive model to inform a screening tool to identify the predicted risk of poor  
45 recovery [transition from acute post-traumatic pain to chronic pain and disability].  
46  
47 3) Estimate the predictive performance of the screening tool through validation of the model  
48 in a separate data set.  
49  
50  
51  
52  
53  
54  
55  
56  
57  
58  
59  
60

## METHODS AND ANALYSIS

### Source of data

The study will be a prospective, observational study of two temporally staggered cohorts of trauma patients, who are emergency department admissions into a Major Trauma Centre in the United Kingdom, with an episode inception defined as the traumatic event [Figure 1]. The first cohort will facilitate development of the prediction model to inform the screening tool, and the second will enable validation of the prediction model through evaluation of the predictive performance of the model and tool.<sup>13 14</sup> The prospective design enables control of unwarranted influences, and enables a stronger case for inferring causal relationships. The nature of the study necessitates predictive statistical modelling.<sup>15</sup> This protocol is written in line with the TRIPOD statement,<sup>16</sup> in which recommendations are given for the reporting of prediction model development and validation.

Prognostic data will be collected at baseline, defined as commencing within 24 hours of recruitment. The outcome data will be collected at 6-months post-injury [working definition of chronic pain];<sup>17</sup> ; the point of evaluation of an individual's absolute risk of poor outcome. In addition, selected data will be measured at 3 and 12-months post-injury to explore the clinical course of recovery following injury in the shorter and longer term.

## Figure 1. Study design

[Insert Figure 1 here].

## Participants

Participants will be recruited from the register of a Major Trauma Centre in the United Kingdom for a period of up to 24 months [planned start date September 2017]. All consecutive eligible patients will be approached for recruitment until the sample size is achieved.

### *Eligibility criteria*

Inclusion criteria: Adult patients aged  $\geq 16$  years who are emergency department admissions into the Major Trauma Centre, with their main criteria for admission being acute musculoskeletal trauma in the preceding 14 days, and a capacity to use and understand written and verbal English language. Key reasons for the 14-day criterion are to be inclusive of patients with severe trauma who are likely to be in intensive care for  $>1$  week, patients requiring surgery as a result of the trauma, fractures that are likely to lead to complications [e.g. ribs], multiple limb fractures, and haemorrhage.

Exclusion criteria: Exclusions will be made where the patient's primary injury is not musculoskeletal [e.g. where the primary injury is to the head], a score of  $\leq 13$  on the Glasgow Coma Scale<sup>18</sup> [a 15-item measure, routinely taken at admission in trauma patients, with adequate reliability<sup>19</sup>], where there is evident brain or central nervous system injury or

1  
2  
3 impairment, long-term neurological conditions [such as brain tumour, multiple sclerosis,  
4 Alzheimer's and Parkinson's diseases, etc], the presence of an ongoing rheumatological or  
5 inflammatory condition, comorbid cancer or infection, prolonged use of corticosteroids,  
6 refusal or lacking capacity to provide written informed consent, or deemed to be vulnerable  
7 by the recruitment research nurse [e.g. severe cognitive impairment, terminal illness, or  
8 severe mental illness].  
9  
10  
11  
12  
13  
14

15  
16  
17  
18       Withdrawals: Participants will be informed that they are free to withdraw from the  
19 study at any time, without needing to provide reason. In the event of death within 3-months  
20 of being recruited, participants will be automatically withdrawn from the study and the  
21 primary prognostic analysis. Baseline characteristics of withdrawn participants will be  
22 compared to those of retained participants to assess for any differences.  
23  
24  
25  
26  
27  
28  
29  
30

### 31 **Recruitment**

32  
33  
34

35       Based on feasibility data, it is estimated that at least 1,000 eligible trauma patients  
36 will be approachable for recruitment over a 24-month period, and that 50% would be  
37 expected to consent to participation. A dedicated team of research nurses will be available to  
38 recruit patients 7-days per week [from 0700 to 1930]. A recruiting research nurse will  
39 provide the participant information sheet and, and following an opportunity for patients to  
40 seek additional information and ask questions, will ask the patient for their written informed  
41 consent. Patients will be informed that they are not only providing consent for future data to  
42 be collected, but also for the use of data already routinely collected during their stay in  
43 hospital. Once consent is gained and the participant recruited, the research nurse will collect  
44 baseline self-reported data via questionnaires [Table 1]. One of the study team will be  
45  
46  
47  
48  
49  
50  
51  
52  
53  
54  
55  
56  
57  
58  
59  
60

1 notified of the recruitment, and after a minimum 1 hour lead time following the informed  
2  
3 consent process [to reduce patient burden] will visit the patient at their bedside to collect the  
4  
5 physical baseline data.  
6  
7  
8  
9

## 10 11 **Outcome**

12  
13  
14  
15  
16 The outcome for the prediction model is an individual's absolute risk of poor outcome  
17 [chronic pain and disability] at 6-months post-injury. Outcome will be measured using the  
18 Chronic Pain Grade Scale [CPGS],<sup>20</sup> which combines pain intensity and pain-related  
19 disability over the preceding 6-months into a single measure of pain *severity*. The CPGS has  
20 previously been used to assess the severity of body-wide chronic pain in general population,<sup>21</sup>  
21 primary care<sup>22</sup> and post-trauma<sup>23</sup> populations. Each item of the CPGS relates to at least one of  
22 the three categories of the International Classification of Functioning, Disability and Health  
23 [ICF]<sup>24</sup>: impairment, activity limitations and restricted participation. Furthermore, all ICF  
24 categories are encompassed by the CPGS.<sup>25</sup> The CPGS is a unidimensional scale, with good  
25 internal consistency across different pain populations; Cronbach's alpha of 0.84 to 0.91 in  
26 back pain, 0.79 for headache, and 0.84 for temporomandibular pain.<sup>20 26</sup> With regards to  
27 construct validity, cross-sectional and longitudinal studies of general practice patients have  
28 shown high scores on the CPGS, indicating greater chronic pain, to be associated with higher  
29 rates of unemployment, greater pain impact scale scores, greater use of opioid analgesics and  
30 physician visits, depressed mood, and lower self-rated health status.<sup>20 26 27</sup> For convergent  
31 validity, the CPGS has been found to have good correlation with equivalent dimensions of  
32 the SF-36.<sup>26 27</sup> In terms of responsiveness, changes in score over time in patients with chronic  
33 musculoskeletal pain correlated significantly with changes in SF-36 scores.<sup>28</sup> The CPGS has  
34  
35  
36  
37  
38  
39  
40  
41  
42  
43  
44  
45  
46  
47  
48  
49  
50  
51  
52  
53  
54  
55  
56  
57  
58  
59  
60

1  
2  
3 also been shown to have good test-retest reliability in primary care patients with back pain  
4  
5 [weighted kappa 0.81, 95% CI 0.65, 0.98].<sup>26</sup>  
6

7 Although pain persistence is not used in assigning pain grade, a measure of pain days  
8  
9 in the prior 6-months is included in the CPGS.<sup>29</sup> The responses on the remaining 7-items are  
10  
11 used for computing scores for the 3 subscales of the CPGS:<sup>20</sup> characteristic pain intensity,  
12  
13 disability score, and disability points. The characteristic pain intensity score [range: 0-100] is  
14  
15 obtained by calculating the mean of 3 pain intensity measurements: 'at the present time', the  
16  
17 'worst pain' in the preceding 6 months, and the 'average' pain over the preceding 6 months.  
18  
19 The disability score [range: 0-100] is obtained through the mean ratings of how much the  
20  
21 pain has interfered in performing activities of daily living, recreational, social and family  
22  
23 activities, and work [including housework] activities in the last 6-months. The disability  
24  
25 points are scored 0-3 and are derived from a combination of ranked categories of the number  
26  
27 of disability days [the number of days that the respondent was away from usual activities in  
28  
29 the preceding 6 months due to pain] and disability score. Based on these scores, the  
30  
31 participant's chronic pain and disability status can then be classified into one of the 5 ordinal  
32  
33 categories of chronic pain severity:<sup>20</sup> no pain [Grade 0], low disability and low intensity pain  
34  
35 [Grade I], low disability and high intensity pain [Grade II], high disability and moderately  
36  
37 limiting intensity pain [Grade III], and high disability and severely limiting intensity pain  
38  
39 [Grade IV]. As in previous studies, poor outcome will be defined as Grade  $\geq$ II.<sup>22 30-33</sup>  
40  
41  
42  
43  
44  
45

## 46 **Candidate predictors**

47  
48  
49

50 Candidate predictors have been selected that are: [1] reliable and valid measures of  
51  
52 their domain, and [2] have a theoretical association with the development of chronic pain.  
53  
54 Both modifiable and non-modifiable candidate predictors are included. Candidate predictors  
55  
56  
57  
58  
59  
60

are summarised in Table 1, with further detail in Supplementary file S1. Table 1 also details important data that will be measured at 3, 6 and 12-months post-injury to explore the clinical course of recovery following injury in the shorter and longer term.

**Table 1: Summary of data collection at different assessment points**

| Candidate predictor                                                                  | Measure / data item                                                                | Baseline $\leq 14$ days post-trauma | 3 months Clinical course | 6 months Outcome assessment point / clinical course | 12 months Clinical course |
|--------------------------------------------------------------------------------------|------------------------------------------------------------------------------------|-------------------------------------|--------------------------|-----------------------------------------------------|---------------------------|
| <b>General patient characteristics including premorbid neuropsychological status</b> |                                                                                    |                                     |                          |                                                     |                           |
| Age                                                                                  | In years                                                                           | √                                   |                          |                                                     |                           |
| Gender                                                                               | Female / male / other                                                              | √                                   |                          |                                                     |                           |
| Body Mass Index [BMI]                                                                | Calculated from height and weight measurements                                     | √                                   |                          |                                                     |                           |
| Education                                                                            | Highest educational level attained                                                 | √                                   |                          |                                                     |                           |
| Employment status                                                                    | Full-time/ part-time / not working / retired / student<br>Employed / self-employed | √                                   | √                        | √                                                   | √                         |
| Circumstance of trauma                                                               | Military / civilian                                                                | √                                   |                          |                                                     |                           |
| Previous history of musculoskeletal pain and injury                                  | Patient history data from patient recollection and medical records                 | √                                   |                          |                                                     |                           |
| Comorbidity of other health problems                                                 | Patient history data from patient recollection and medical records                 | √                                   |                          |                                                     |                           |
| Premorbid physical health                                                            | Patient history data from patient recollection and medical records                 | √                                   |                          |                                                     |                           |
| Premorbid psychological health                                                       | Patient history data from patient recollection and medical records                 | √                                   |                          |                                                     |                           |
| Number of days in hospital                                                           | Intensive care / ward / total                                                      | √                                   |                          |                                                     |                           |
| <b>Quality of life and physical functioning</b>                                      |                                                                                    |                                     |                          |                                                     |                           |
| General health                                                                       | 36-item Short Form Health Survey [SF-36] <sup>34</sup>                             | √                                   | √                        | √                                                   | √                         |
| Health-related quality of life                                                       | EQ-5D-5L <sup>35</sup>                                                             | √                                   | √                        | √                                                   | √                         |
| Self-care and mobility during activities of daily living                             | Barthel Index of Activities of Daily Living <sup>36</sup>                          | √                                   |                          |                                                     |                           |
| Sleep quality                                                                        | Subjective Health Complaints Inventory                                             | √                                   | √                        | √                                                   | √                         |
| Brain/CNS impairment                                                                 | Glasgow Coma Scale <sup>18</sup>                                                   | √                                   |                          |                                                     |                           |
| <b>Psychosocial features</b>                                                         |                                                                                    |                                     |                          |                                                     |                           |
| Anxiety and depression                                                               | Hospital Anxiety and Depression Scales [HADS] <sup>37</sup>                        | √                                   | √                        | √                                                   | √                         |
| Rumination, magnification or helplessness about                                      | Pain Catastrophizing Scale <sup>38</sup>                                           | √                                   | √                        | √                                                   | √                         |

|                                                                 |                                                                                                                                                                   |                |   |   |   |
|-----------------------------------------------------------------|-------------------------------------------------------------------------------------------------------------------------------------------------------------------|----------------|---|---|---|
| controlling pain                                                |                                                                                                                                                                   |                |   |   |   |
| Fear of movement or fear of injury or re-injury during movement | Tampa Scale of Kinesiophobia [TSK-11] <sup>39</sup>                                                                                                               | √              | √ | √ | √ |
| Confidence in ability to perform activities despite pain        | Pain Self-Efficacy Questionnaire <sup>40</sup>                                                                                                                    | √              | √ | √ | √ |
| Subjective post-traumatic distress                              | Impact of Event Scale revised [IES-R] <sup>41</sup>                                                                                                               | √              | √ | √ | √ |
| <b>Injury characteristics</b>                                   |                                                                                                                                                                   |                |   |   |   |
| Time of injury/incident                                         | Hospital record data                                                                                                                                              | √              |   |   |   |
| Injury location                                                 | Adapted pain drawings, based on hospital record data                                                                                                              | √              |   |   |   |
| Tissues damaged                                                 | Based on imaging data and hospital records<br>Fractures<br>Penetrating / non-penetrating injury / both                                                            | √              |   |   |   |
| Surgery required                                                | Location and post-injury timing of surgery                                                                                                                        | √              |   |   |   |
| Assisted mechanical ventilation required                        | Yes / no / duration                                                                                                                                               | √              |   |   |   |
| Severity of injury                                              | Injury Severity Score <sup>42</sup>                                                                                                                               | √              |   |   |   |
| <b>Pain characteristics</b>                                     |                                                                                                                                                                   |                |   |   |   |
| Chronic pain severity                                           | Chronic Pain Grade Scale <sup>20</sup>                                                                                                                            |                |   | √ | √ |
| Pain intensity                                                  | 11-point [0-10] Numerical Rating Scale, relating to current pain, from 'no pain' to 'pain as bad as could be' [collected as part of the Chronic Pain Grade Scale] | √ <sup>1</sup> | √ | √ | √ |
| Pain medication intake [type and dosage]                        | Medication Quantification Score <sup>43-45</sup>                                                                                                                  | √ <sup>1</sup> |   |   |   |
| Pain and injury extent                                          | Electronic pain drawing <sup>46</sup>                                                                                                                             | √ <sup>1</sup> |   |   |   |
| Self-reported features of neuropathic pain                      | painDETECT <sup>47</sup>                                                                                                                                          | √ <sup>1</sup> | √ | √ | √ |
| <b>Quantitative sensory testing</b>                             |                                                                                                                                                                   |                |   |   |   |
| Heat pain threshold                                             | Evaluation of pain threshold using a heat stimulus                                                                                                                | √ <sup>1</sup> |   |   |   |
| Cold pain threshold                                             | Evaluation of pain threshold using a cold stimulus                                                                                                                | √ <sup>1</sup> |   |   |   |
| Pressure pain threshold                                         | Evaluation of pain threshold using a pressure stimulus                                                                                                            | √ <sup>1</sup> |   |   |   |
| Temporal summation                                              | Evaluation of pain intensity in response to repetitive pressure stimuli                                                                                           | √ <sup>1</sup> |   |   |   |
| <b>Biomarkers</b>                                               |                                                                                                                                                                   |                |   |   |   |
| C-reactive protein [CRP]                                        | Serum levels of CRP [via blood tests]                                                                                                                             | √ <sup>1</sup> |   |   |   |

<sup>1</sup> Measurements to be taken at baseline [recruitment] and repeatedly whilst in hospital ward

## Data handling

Baseline self-reported questionnaire data will be collected by the recruiting research nurse. Blood test data will be collected and processed through the research nurse team. The remaining baseline data [pain and injury drawings, quantitative sensory testing] will be collected by one of three assessors from the study team, trained to administer these augmented assessments. An inter-rater reliability study [across the 3 assessors] will be initially conducted in a trauma population to inform definitive testing protocols. The order of data collection will be randomised according to the modality of the testing to prevent order effects. Self-reported questionnaires will be formatted using FORMIC document recognition software, so that data can be acquired and scanned directly into an electronic database. Data will be checked for completeness and cross-checked for accuracy. All outcome measure data will be collated into an anonymised database and stored securely for a minimum period of 10-years at the University of Birmingham, in line with Research Governance procedures. Participants will receive usual care, and interventions received will be recorded for descriptive analysis. Data will be analysed using IBM SPSS Statistics. Participant identifiable information will be kept on an encrypted electronic database file, stored in line with current United Kingdom data protection legislation, and only accessible by the Research Nurse Lead who will not be involved in data analysis.

## Sample size

In predictive modelling, a larger sample size enables lower bias and variance, and permits the prospective prediction of new observations.<sup>15</sup> The sample size will provide at

1  
2  
3 least 10 cases per candidate predictor, to adequately power the final regression analysis.<sup>48 49</sup>

4  
5 Data will be collected for an estimated 250 participants per cohort [n=500 total].  
6  
7

### 8 9 **Statistical analysis methods and management of missing data** 10

11  
12  
13 Potentially eligible patients, numbers examined for eligibility, confirmed eligible,  
14 recruited into the study, completing follow-up, and analysed will be reported in a flow  
15 diagram. Reasons for non-participation, exclusion, drop-outs or withdrawal [e.g. death]  
16 will be reported at each stage. Participant characteristics will be descriptively presented.  
17  
18 For each variable of interest, the number of participants with missing data will be reported.  
19  
20 The correlation between candidate prognostic factors will be calculated at baseline.  
21  
22  
23  
24  
25  
26  
27

28  
29 Statistical modelling for prediction has been planned *a priori*. To explore the  
30 influence of each prognostic factor on poor outcome at 6 months, both linear and logistic [to  
31 dichotomise the 6-month score into low and high risk] multivariable regression models will  
32 be fitted and mean differences or odds ratios for each candidate prognostic factor reported,  
33 adjusted for other factors and accounting for clustering [e.g. level of injury severity]. If  
34 necessary, multiple imputation<sup>50</sup> will be used to deal with missing outcome data. The  
35 characteristics of those patients with and without 6-month data will also be compared, to  
36 inform whether patients with no 6-month data were missing at random. Multivariable  
37 analysis will initially include all candidate prognostic factors, and full results reported.  
38  
39 Reduced multivariable analyses will be considered if necessary [e.g. removing one of two  
40 candidate prognostic factors that are highly correlated at baseline], to examine the robustness  
41 of the conclusions.  
42  
43  
44  
45  
46  
47  
48  
49  
50  
51  
52  
53  
54  
55  
56  
57  
58  
59  
60

## **Risk groups and development of the prognostic screening tool**

The prognostic model will be used to develop a risk stratification tool to inform an individual's absolute risk of poor outcome. The stratification tool will inform clinical decision-making for precision rehabilitation. Selection of items for the model will include those factors that are statistically significantly [ $p < 0.05$ ] associated with poor outcome according to the full multivariable regression analysis, and those deemed clinically important to retain [regardless of statistical significance] to improve face validity for clinicians. The regression model with included prognostic factors will be fitted to the data from the first of the two cohorts to obtain a final set of parameter estimates [i.e. alpha and beta terms], which will be used to form the model. An important requirement of the stratification tool is that it should be brief to facilitate use in clinical practice. Thus, we will look to simplify the model where possible to facilitate its use, but without important reduction in its prognostic ability in terms of calibration and discrimination. For example, if multi-item questionnaire scores are included in the model, then we will evaluate whether just one of the questionnaire items is sufficient. Ideally, this process will result in a full and simplified model.

## **Development versus validation**

For validation of the model, data from the second of the two cohorts will be compared to that of the first to enable analysis of the distribution of important variables; inclusive of demographic, predictor and outcome variables. An estimate of the predictive performance of the screening tool will be established through validation of the model using data from the second cohort. Data in both cohorts will be consistent in terms of setting, eligibility criteria, outcome, and predictors.

## DISCUSSION

There is an urgent need for a robust prognostic study to predict the transition from acute to chronic pain in a musculoskeletal trauma population. Using such a comprehensive array of outcome measures will allow the development and validation of a prognostic tool to predict development of chronic and disabling pain, and begin the process of identifying appropriate and precision interventions.

The candidate predictors used in this study have been chosen to be as comprehensive as possible, based on current knowledge of pain science. Other candidate predictors were considered [e.g. microRNA biomarkers], but their mechanistic functions and temporal progression are not yet sufficiently clear to justify the expense of their inclusion. The combination of patient reported outcome measures, psychophysical testing and biomarkers that are included are designed to act as surrogates for the four primary mechanisms of pain:<sup>51</sup>  
<sup>8</sup> *nociceptive* [injury location, severity and characteristics], *neuropathic* [painDETECT tool and pain extent, *inflammatory* [biomarkers], and *central hypersensitivity* [quantitative sensory testing, painDETECT and pain extent]. In addition, other patient-reported outcome measures [e.g. pain intensity, post-traumatic stress, anxiety and depression, and self-efficacy] are included as the domains that they measure have been shown to influence prognosis for long-term outcomes in populations with pain in a range of locations.<sup>9 22 23</sup>

Rehabilitation is widely regarded as an important component of post-trauma healthcare;<sup>52</sup> however, the current position of equipoise means that precision rehabilitation has not yet been identified. Understanding mechanisms that underlie the transition from acute to chronic pain is essential to moving beyond this position. Identifying prognostic factors

related to poor outcome of pain and disability outcome will facilitate targeting of effective interventions. This will inform rehabilitation decision making, and facilitate improvements in clinical and cost effectiveness of rehabilitation interventions.

Limited research has identified criteria for quality in a prognostic model, but authors have identified potential quality issues to ensure methodological rigour.<sup>53</sup> These issues are summarised in Table 2 and incorporated into the study design to ensure low risk of bias in development and validation of the predictive model.

**Table 2: Methodological decisions to improve study quality**

| Criteria <sup>53</sup>                                       | Methodological decisions to improve quality                                                                                                                                                                                                    |
|--------------------------------------------------------------|------------------------------------------------------------------------------------------------------------------------------------------------------------------------------------------------------------------------------------------------|
| <b>Study design</b>                                          |                                                                                                                                                                                                                                                |
| Inception cohort                                             | <ul style="list-style-type: none"> <li>• Clear description of population</li> <li>• Clear description of the participants at baseline</li> </ul>                                                                                               |
| Source population                                            | <ul style="list-style-type: none"> <li>• Clear description of population</li> <li>• Clear description of sampling frame and recruitment [method and timing]</li> </ul>                                                                         |
| Inclusion and exclusion criteria                             | <ul style="list-style-type: none"> <li>• Clarity of eligibility criteria</li> </ul>                                                                                                                                                            |
| Prospective design                                           | <ul style="list-style-type: none"> <li>• Clarity of study design</li> </ul>                                                                                                                                                                    |
| <b>Study attrition</b>                                       |                                                                                                                                                                                                                                                |
| Number of drop-outs                                          | <ul style="list-style-type: none"> <li>• Adequate participation rate</li> <li>• Clear description of attempts to collect information on participants who dropped out</li> <li>• Reporting numbers and reasons for loss to follow-up</li> </ul> |
| Information provided on method of management of missing data | <ul style="list-style-type: none"> <li>• Appropriate methods of imputation of missing data</li> </ul>                                                                                                                                          |
| <b>Prognostic factors</b>                                    |                                                                                                                                                                                                                                                |
| All prognostic factors described used to develop the model   | <ul style="list-style-type: none"> <li>• Clear definition of prognostic factors</li> <li>• An adequate proportion of participants has complete data for the prognostic factor</li> </ul>                                                       |
| Standardised or valid measurements                           | <ul style="list-style-type: none"> <li>• The measurement of the prognostic factor is reliable and valid</li> <li>• The measurement of the prognostic factor is the same for all participants</li> </ul>                                        |
| Linearity assumption studied                                 | <ul style="list-style-type: none"> <li>• Linearity of data will be reported</li> </ul>                                                                                                                                                         |
| No dichotomization of prognostic variables                   | <ul style="list-style-type: none"> <li>• Continuous variables will be reported where possible</li> </ul>                                                                                                                                       |
| Data presentation all prognostic factors                     | <ul style="list-style-type: none"> <li>• Complete data will be presented</li> </ul>                                                                                                                                                            |

|                                                      |                                                                                                                                                                                         |
|------------------------------------------------------|-----------------------------------------------------------------------------------------------------------------------------------------------------------------------------------------|
| <b>Outcome measures</b>                              |                                                                                                                                                                                         |
| Description of outcome measures                      | <ul style="list-style-type: none"> <li>The outcome is clearly defined</li> </ul>                                                                                                        |
| Standardised or valid measurements                   | <ul style="list-style-type: none"> <li>The measurement of the outcome is reliable and valid</li> <li>The measurement of the outcome is the same for all participants</li> </ul>         |
| Data presentation of most important outcome measures | <ul style="list-style-type: none"> <li>Complete data will be presented</li> </ul>                                                                                                       |
| <b>Analysis</b>                                      |                                                                                                                                                                                         |
| Presentation of univariate crude estimates           | <ul style="list-style-type: none"> <li>An appropriate strategy for model building is described</li> <li>An adequate statistical model described</li> </ul>                              |
| Sufficient numbers of subjects per variable          | <ul style="list-style-type: none"> <li>Adequate data will be presented</li> </ul>                                                                                                       |
| Selection method of variables explained              | <ul style="list-style-type: none"> <li>Sufficient data will be presented to enable assessment of the adequacy of the analytic strategy</li> <li>All results will be reported</li> </ul> |
| Presentation of multivariate estimates               | <ul style="list-style-type: none"> <li>An appropriate strategy for model building is described</li> <li>An adequate statistical model described</li> </ul>                              |
| <b>Clinical performance / validity</b>               |                                                                                                                                                                                         |
| Clinical performance                                 | <ul style="list-style-type: none"> <li>Clinical performance of the model will be reported</li> </ul>                                                                                    |
| Internal validation                                  | <ul style="list-style-type: none"> <li>Internal validation will be reported</li> </ul>                                                                                                  |
| External validation                                  | Not a focus of this study                                                                                                                                                               |

## ETHICS AND DISSEMINATION

Ethical approval will be obtained from the NHS Research Ethics Committee, and institutional R&D approval will also be obtained. The primary ethical concern is to limit distress on participants. As such, to reduce the patient burden when measuring baseline outcomes, the recruiting research nurses will administer self-reported questionnaires immediately following obtaining informed consent, and other outcomes will be measured by members of the study team at least 1 hour later. Patients will be asked to consent to not only providing new data for the study, but also for the study team to access information that had already been routinely collected by the hospital staff since the time of admission [e.g. nature and circumstances of injury, previous medical history, blood test results, pain intensity on

1  
2  
3 admission]. This will be fully explained to patients and explicitly detailed in the participant  
4 information sheet. All blood and tissue samples will be administered by hospital staff and the  
5 research nurse team and will be stored, tested and disposed of in accordance with current  
6 United Kingdom guidelines and regulations. Participants will be informed that they are free  
7 to withdraw from the study at any time, without needing to provide reason. In the event of  
8 death within 3 months of being recruited, participants will be automatically withdrawn from  
9 the study and the primary prognostic analysis. Baseline characteristics of withdrawn  
10 participants will be compared to those of retained participants to assess for any differences.  
11  
12  
13  
14  
15  
16  
17  
18  
19  
20  
21  
22  
23  
24  
25  
26  
27  
28  
29  
30  
31  
32  
33  
34  
35  
36  
37  
38  
39  
40  
41  
42  
43  
44  
45  
46  
47  
48  
49  
50  
51  
52  
53  
54  
55  
56  
57  
58  
59  
60

peer review only

**REFERENCES**

1. Berben SA, Schoonhoven L, Meijjs TH, et al. Prevalence and relief of pain in trauma patients in emergency medical services. *Clin J Pain* 2011;27(7):587-92. doi: 10.1097/AJP.0b013e3182169036
2. Williamson OD, Epi GD, Gabbe BJ, et al. Predictors of moderate or severe pain 6 months after orthopaedic injury: a prospective cohort study. *J Orthop Trauma* 2009;23(2):139-44. doi: 10.1097/BOT.0b013e3181962e29
3. Mannion RJ, Woolf CJ. Pain mechanisms and management: a central perspective. *Clin J Pain* 2000;16(3 Suppl):S144-56.
4. Holbrook TL, Anderson JP, Sieber WJ, et al. Outcome after major trauma: discharge and 6-month follow-up results from the Trauma Recovery Project. *J Trauma* 1998;45(2):315-23; discussion 23-4.
5. Holbrook TL, Anderson JP, Sieber WJ, et al. Outcome after major trauma: 12-month and 18-month follow-up results from the Trauma Recovery Project. *J Trauma* 1999;46(5):765-71; discussion 71-3.
6. Harris IA, Young JM, Rae H, et al. Predictors of general health after major trauma. *J Trauma* 2008;64(4):969-74. doi: 10.1097/01.ta.0000245972.83948.1a
7. Ponsford J, Hill B, Karamitsios M, et al. Factors influencing outcome after orthopedic trauma. *J Trauma* 2008;64(4):1001-9. doi: 10.1097/TA.0b013e31809fec16
8. Vardeh D, Mannion RJ, Woolf CJ. Toward a Mechanism-Based Approach to Pain Diagnosis. *J Pain* 2016;17(9 Suppl):T50-69. doi: 10.1016/j.jpain.2016.03.001
9. Artus M, Campbell P, Mallen CD, et al. Generic prognostic factors for musculoskeletal pain in primary care: a systematic review. *BMJ Open* 2017;7(1):e012901. doi: 10.1136/bmjopen-2016-012901
10. Latremoliere A, Woolf CJ. Central sensitization: a generator of pain hypersensitivity by central neural plasticity. *J Pain* 2009;10(9):895-926. doi: 10.1016/j.jpain.2009.06.012
11. Linley JE, Rose K, Ooi L, et al. Understanding inflammatory pain: ion channels contributing to acute and chronic nociception. *Pflugers Arch* 2010;459(5):657-69. doi: 10.1007/s00424-010-0784-6
12. CJ. W. Central sensitization: implications for the diagnosis and treatment of pain. *Pain* 2011;152(3):S2-15.

13. Altman DG, Vergouwe Y, Royston P, et al. Prognosis and prognostic research: validating a prognostic model. *BMJ* 2009;338(338):b605. doi: 10.1136/bmj.b605
14. Moons KG, Kengne AP, Grobbee DE, et al. Risk prediction models: II. External validation, model updating, and impact assessment. *Heart* 2012;98(9):691-8. doi: 10.1136/heartjnl-2011-301247
15. Shmueli G. To explain or to predict? *Statistical Science* 2010;25(3):289-310.
16. Collins GS, Reitsma, J.B., Altman, D.G. and Moons, K.G., . Transparent reporting of a multivariable prediction model for individual prognosis or diagnosis (TRIPOD): the TRIPOD statement. *BMC Medicine* 2015;13(1)
17. Merskey H BN. Classification of chronic pain : descriptions of chronic pain syndromes and definitions of pain terms. USA: IASP Press 1994.
18. Teasdale G, Jennett B. Assessment of coma and impaired consciousness. A practical scale. *Lancet* 1974;2(7872):81-4.
19. Reith FC, Van den Brande R, Synnot A, et al. The reliability of the Glasgow Coma Scale: a systematic review. *Intensive Care Med* 2016;42(1):3-15. doi: 10.1007/s00134-015-4124-3
20. Von Korff M, Ormel J, Keefe FJ, et al. Grading the severity of chronic pain. *Pain* 1992;50(2):133-49.
21. Parsons S, Breen A, Foster NE, et al. Prevalence and comparative troublesomeness by age of musculoskeletal pain in different body locations. *Fam Pract* 2007;24(4):308-16. doi: 10.1093/fampra/cmm027
22. Muller S, Thomas E, Dunn KM, et al. A prognostic approach to defining chronic pain across a range of musculoskeletal pain sites. *Clin J Pain* 2013;29(5):411-6. doi: 10.1097/AJP.0b013e318257099e
23. Rivara FP, Mackenzie EJ, Jurkovich GJ, et al. Prevalence of pain in patients 1 year after major trauma. *Arch Surg* 2008;143(3):282-7; discussion 88. doi: 10.1001/archsurg.2007.61
24. Organization WH. The International Classification of Functioning, Disability and Health (ICF). Geneva: WHO 2001.
25. Dixon D PD, Johnston M. What does the chronic pain grade questionnaire measure? *Pain* 2007;130:249-53.

- 1  
2  
3 26. Smith BH, Penny KI, Purves AM, et al. The Chronic Pain Grade questionnaire: validation  
4 and reliability in postal research. *Pain* 1997;71(2):141-7.  
5  
6 27. Penny KI PA, Smith BH, Chambers WA, Smith WC. Relationship between the chronic  
7 pain grade and measures of physical, social and psychological well-being. *pain*  
8 1999;79:275-9.  
9  
10 28. Elliott AM SB, Smith WC, Chambers WA. Changes in chronic pain severity over time:  
11 The Chronic Pain Grade as a valid measure. *Pain* 2000;88:303.  
12  
13 29. Von Korff M, Jensen MP, Karoly P. Assessing global pain severity by self-report in  
14 clinical and health services research. *Spine (Phila Pa 1976)* 2000;25(24):3140-51.  
15  
16 30. Von Korff M, Miglioretti DL. A prognostic approach to defining chronic pain. *Pain*  
17 2005;117(3):304-13. doi: 10.1016/j.pain.2005.06.017  
18  
19 31. Von Korff M, Dunn KM. Chronic pain reconsidered. *Pain* 2008;138(2):267-76. doi:  
20 10.1016/j.pain.2007.12.010  
21  
22 32. Dunn KM, Croft PR, Main CJ, et al. A prognostic approach to defining chronic pain:  
23 replication in a UK primary care low back pain population. *Pain* 2008;135(1-2):48-  
24 54. doi: 10.1016/j.pain.2007.05.001  
25  
26 33. Thomas E, Dunn KM, Mallen C, et al. A prognostic approach to defining chronic pain:  
27 application to knee pain in older adults. *Pain* 2008;139(2):389-97. doi:  
28 10.1016/j.pain.2008.05.010  
29  
30 34. Hays RD, Sherbourne CD, Mazel RM. The RAND 36-Item Health Survey 1.0. *Health*  
31 *Econ* 1993;2(3):217-27.  
32  
33 35. Brooks R. EuroQol: the current state of play. *Health Policy* 1996;37(1):53-72.  
34  
35 36. Mahoney FI, Barthel DW. Functional Evaluation: The Barthel Index. *Md State Med J*  
36 1965;14:61-5.  
37  
38 37. Zigmond AS, Snaith RP. The hospital anxiety and depression scale. *Acta Psychiatr Scand*  
39 1983;67(6):361-70.  
40  
41 38. Sullivan JL, Bishop SR, Pivik J. The pain catastrophizing scale: development and  
42 validation. *Psychological Assessment* 1995;7:524-32.  
43  
44 39. Woby SR, Roach NK, Urmston M, et al. Psychometric properties of the TSK-11: a  
45 shortened version of the Tampa Scale for Kinesiophobia. *Pain* 2005;117(1-2):137-44.  
46 doi: 10.1016/j.pain.2005.05.029  
47  
48 40. M.K. N. The pain self-efficacy questionnaire: Taking pain into account. *Eur J Pain*  
49 2007;11(2):153-63.  
50  
51  
52  
53  
54  
55  
56  
57  
58  
59  
60

- 1  
2  
3 41. Beck JG, Grant DM, Read JP, et al. The impact of event scale-revised: psychometric  
4 properties in a sample of motor vehicle accident survivors. *J Anxiety Disord*  
5 2008;22(2):187-98. doi: 10.1016/j.janxdis.2007.02.007
- 6  
7 42. Baker SP, O'Neill B, Haddon W, Jr., et al. The injury severity score: a method for  
8 describing patients with multiple injuries and evaluating emergency care. *J Trauma*  
9 1974;14(3):187-96.
- 10  
11 43. Masters Steedman S, Middaugh SJ, Kee WG, et al. Chronic-pain medications:  
12 equivalence levels and method of quantifying usage. *Clin J Pain* 1992;8(3):204-14.
- 13  
14 44. Harden RN, Weinland SR, Remble TA, et al. Medication Quantification Scale Version  
15 III: update in medication classes and revised detriment weights by survey of  
16 American Pain Society Physicians. *J Pain* 2005;6(6):364-71. doi:  
17 10.1016/j.jpain.2005.01.350
- 18  
19 45. Gallizzi M GC, Harden RN, Stanos S, Khan A. Medication Quantification Scale Version  
20 III: internal validation of detriment weights using a chronic pain population. . *Pain*  
21 *Pract* 2008;8(1):1-4.
- 22  
23 46. Barbero M, Mores, F., Leoni, D., Gatti, R., Egloff, M., Falla, D. Test-retest reliability of  
24 pain extent and pain location using a novel method for pain drawing analysis.  
25 *European Journal of Pain* 2015;19:1129-38.
- 26  
27 47. Freynhagen R, Baron R, Gockel U, et al. painDETECT: a new screening questionnaire to  
28 identify neuropathic components in patients with back pain. *Curr Med Res Opin*  
29 2006;22(10):1911-20. doi: 10.1185/030079906X132488
- 30  
31 48. Peduzzi P, Concato J, Kemper E, et al. A simulation study of the number of events per  
32 variable in logistic regression analysis. *J Clin Epidemiol* 1996;49(12):1373-9.
- 33  
34 49. Vittinghoff E, McCulloch CE. Relaxing the rule of ten events per variable in logistic and  
35 Cox regression. *Am J Epidemiol* 2007;165(6):710-8. doi: 10.1093/aje/kwk052
- 36  
37 50. Sterne JA, White IR, Carlin JB, et al. Multiple imputation for missing data in  
38 epidemiological and clinical research: potential and pitfalls. *BMJ* 2009;338:b2393.  
39 doi: 10.1136/bmj.b2393
- 40  
41 51. Woolf CJ, Bennett GJ, Doherty M, et al. Towards a mechanism-based classification of  
42 pain? *Pain* 1998;77(3):227-9.
- 43  
44 52. NICE. Rehabilitation after critical illness in adults Clinical guideline [CG83]. 2009
- 45  
46 53. van Oort L, van den Berg T, Koes BW, et al. Preliminary state of development of  
47 prediction models for primary care physical therapy: a systematic review. *J Clin*  
48 *Epidemiol* 2012;65(12):1257-66. doi: 10.1016/j.jclinepi.2012.05.007
- 49  
50  
51  
52  
53  
54  
55  
56  
57  
58  
59

**Authors' contributions**

DF and AR are the Chief Investigators leading protocol development, analyses and dissemination. DE is the Research Fellow with responsibility for study management. NM is a Doctoral Researcher focused to this study. NH is the lead for Patient and Public Involvement. DF and AR are overseeing data analysis. All authors will contribute to data interpretation, conclusions, and dissemination. AR drafted the initial manuscript with DF. Subsequent drafts were developed with DE. All reviewers have read, contributed to, and agreed the final manuscript. DF is the guarantor.

**Funding statement**

This work was supported by the National Institute for Health Research (NIHR) to DF and AR.

**Competing interests**

There are no competing interests.

**Data sharing statement**

No additional data are available.



Study design

289x247mm (96 x 96 DPI)

only

## SUPPLEMENTARY FILE 1: CANDIDATE PROGNOSTIC FACTORS

### *General participant characteristics*

Several participant demographic features will be recorded at baseline, based on available hospital records and patient self-reported recollection, including smoking status, age, gender, height and weight to calculate body mass index [BMI], education [highest attained educational level], employment status [at the time of trauma], circumstance of trauma [military or civilian], previous history of musculoskeletal pain and injury, comorbidity of other current health problems.

### *Quality of life and physical functioning*

#### 36-Item Short Form Health Survey [SF-36]

The SF-36 is a self-reported measure of health-related quality of life, developed at RAND as part of the Medical Outcomes Study.<sup>1</sup> The 36-item questionnaire has subscales that assess physical, function, social and psychological wellbeing.<sup>2 3</sup> The scores can be divided into physical and mental component summary scales.<sup>4</sup> The SF-36 has been shown to be valid and has been tested extensively in a trauma population.<sup>5</sup> Ware<sup>6</sup> reports multiple studies showing internal consistency above 0.70, with physical and mental scores exceeding 0.90. Minimal clinically important difference has been reported as 5.5 in a musculoskeletal trauma population.<sup>7</sup>

#### EuroQol Five Dimension Scale [EQ-5D-5L]

Health-related quality of life will be quantified using the EQ-5D-5L through which 243 possible health states are converted to a single index value of range -0.594 to 1 where 1

1  
2  
3 is perfect health, and a visual analogue scale range 0–100, representing ‘worst’ to ‘best’  
4 imaginable health state, respectively.<sup>8</sup> The EQ-5D-5L has improved inter-observer [ICC 2,1  
5 0.57] and test-retest [ICC 2,1 0.69] reliability compared to the previous EQ-5D-3L.<sup>9</sup> In  
6  
7 addition, it has less ceiling effects [20.8% reduction] and adequate convergent validity when  
8  
9 compared with the WHO-5 [spearman rank 0.38-0.51].<sup>10</sup>  
10  
11  
12  
13  
14

### 15 Barthel Index of Activities of Daily Living

16  
17 The Barthel Index of Activities of Daily Living will be used to evaluate self-care and  
18 mobility during activities of daily living.<sup>11 12</sup> It is a 10-item ordinal scale encompassing a  
19 range of mobility physical activity tasks. Each item is related to a specific task and rated with  
20 a given number of points. A score of ‘0’ is given for least independence/function on that item  
21 and scores above that [1 or 2] are given for increasing independence/function [range: 0-20].  
22  
23 The amount of time and physical assistance required to perform each task are used in  
24 determining the assigned value of each item. A higher score is associated with a greater  
25 likelihood of being able to live at home with a degree of independence following discharge  
26 from hospital. With most measurement testing performed in the stroke population, the Barthel  
27 Index has demonstrated excellent internal consistency [0.89-0.90]<sup>13</sup> and is highly responsive  
28 in detecting changes<sup>14</sup> with a minimal detectable change of 4.02 and minimally clinically  
29 important difference of 1.85.<sup>15</sup> High correlations have been demonstrated to the Functional  
30 Independence Measure [FIM], indicating convergent validity of the measure.<sup>16</sup>  
31  
32  
33  
34  
35  
36  
37  
38  
39  
40  
41  
42  
43  
44  
45  
46  
47

### 48 Subjective Health Complaints Inventory

49  
50 Sleep quality will be assessed using the single-item questions from the sleep domain  
51 of the Subjective Health Complaints Inventory.<sup>17</sup> The Subjective Health Complaints  
52  
53 Inventory has been shown to be a reliable measure of recording subjective health  
54  
55  
56  
57  
58  
59  
60

1  
2  
3 complaints;<sup>17</sup> although no study has focused on the reliability of using the single item relating  
4  
5 to sleep.  
6  
7

### 8 9 *Psychosocial features*

#### 10 11 12 13 The Hospital Anxiety and Depression Scales [HADS]

14  
15  
16 The HADS will be used to measure depression and anxiety, and their role in the  
17  
18 manifestation of somatic symptoms.<sup>18</sup> There are 7 items which produce a cumulative score  
19  
20 [range 0–21] for the anxiety [HADS-A] and depression [HADS-D] subscales, with a higher  
21  
22 score indicative of greater anxiety and depression.<sup>19</sup> HADS has been tested in multiple  
23  
24 populations demonstrating adequate to excellent internal consistency of HADS-A [0.68-0.93]  
25  
26 and HADS-D [0.67-0.90].<sup>19</sup> Standard measurement of error in a coronary heart disease  
27  
28 population was identified as 1.37 and 1.44 for anxiety and depression scales respectively, and  
29  
30 minimal detectable change as 3.80 and 3.99 respectively.<sup>20</sup> The HADS has also demonstrated  
31  
32 excellent concurrent validity when compared to various other depression/anxiety scales.<sup>19</sup>  
33  
34  
35  
36

#### 37 38 Pain Catastrophizing Scale [PCS]

39  
40 The PCS will be used to provide an indication of individuals who ruminate, magnify  
41  
42 or feel helpless about controlling their pain.<sup>21</sup> It is a 13-item scale, and participants are asked  
43  
44 to indicate the degree to which they have particular thoughts and feelings when they are  
45  
46 experiencing pain. Items are scored with '0' representing 'not at all' and a maximum of '4'  
47  
48 represents 'all the time'. Scores on each item are summed to yield a total score ranging 0-52.  
49  
50 A higher score reflects greater negative pain-related thoughts, emotional distress, and pain  
51  
52 intensity. The PCS has demonstrated excellent internal consistency in a population of low  
53  
54 back pain patients [0.90] with a 4.6% minimal detectable change.<sup>22</sup> Excellent intra  
55  
56  
57  
58  
59  
60

1  
2  
3 [ICC {model not reported} 0.88], inter-rater [ICC {model not reported} 0.77] reliability has  
4  
5 been demonstrated in a low back pain population.<sup>23</sup>  
6  
7

#### 9 Tampa Scale of Kinesiophobia [TSK-11]

11 The TSK-11 will be used to assess fear of movement or fear of injury or re-injury  
12 during movement.<sup>24</sup> It is an 11-item questionnaire, eliminating psychometrically poor items  
13 from its original 17-item version,<sup>25</sup> thus creating a shorter questionnaire with comparable  
14 internal consistency and a 2-factor structure [activity avoidance and harm]. Each of the 11  
15 items is measured using a 4-point scale using the end points 1 [‘totally agree’] and 4 [‘totally  
16 disagree’] [scoring range 11–44]. Higher scores indicate more fear-avoidance behaviour. The  
17 TSK-11 has demonstrated acceptable to good internal consistency in acute and chronic  
18 musculoskeletal pain populations.<sup>24 26</sup> Test-retest reliability has been reported as excellent  
19 with a high standardised response mean; with good construct validity in relation to changes in  
20 disability and pain.<sup>24</sup>  
21  
22  
23  
24  
25  
26  
27  
28  
29  
30  
31  
32  
33  
34

#### 35 Pain Self-Efficacy Questionnaire [PSEQ]

37 The patient’s confidence in their ability to perform activities despite their pain will be  
38 evaluated using the PSEQ. Developed from the Self-Efficacy Scale,<sup>27</sup> the PSEQ consists of  
39 10 physical and psychosocial activity items measuring from 0 [‘not at all confident’] to 6  
40 [‘completely confident’] thus generating a total score from 0-60.<sup>28</sup> The PSEQ has  
41 demonstrated excellent internal consistency [0.92], internal reliability [0.93], and test-re-test  
42 correlations [r=0.73] and has demonstrated validity when compared to other self-efficacy  
43 measurements.<sup>28</sup> It has been used in several large population studies, for example Campbell  
44 et al.<sup>29</sup>  
45  
46  
47  
48  
49  
50  
51  
52  
53  
54  
55  
56  
57  
58  
59  
60

### Impact of Event Scale Revised [IES-R]

The IES-R will be used to measure the subjective stress experienced by the participant following their traumatic event. The IES-R is a 22-item tool [range: 0-88] that consists of 8 intrusion and 8 avoidance items that are derived from the original IES,<sup>30</sup> with an additional 7-items assessing hyperarousal.<sup>31</sup> Accordingly, items correspond directly to symptoms of post-traumatic stress disorder.<sup>31</sup> Respondents are asked to identify a specific stressful life event and then indicate how much they were distressed or bothered during the past seven days by each 'difficulty' listed. Each item is rated on a 5-point scale ranging from 0 ['not at all'] to 4 ['extremely']. The IES-R yields a total score ranging 0 to 88 and subscale scores can also be calculated for the Intrusion, Avoidance, and Hyperarousal sub-scales. The IES-R has demonstrated good internal consistency for all subscales [intrusion 0.87-0.94, avoidance 0.84-0.97, hyperarousal 0.79-0.91].<sup>32</sup> High correlations have been found between the IES-R and the original scale, supporting the concurrent validity of both measures.<sup>31</sup>

### ***Injury characteristics***

Several measures relating to the characteristics of the sustained injury will be taken at baseline. The time of the injury will be gained from hospital records. The location of the injury/injuries will be recorded using an adapted version of previously developed pain drawing software, via a tablet computer.<sup>33</sup> Information relating to the tissues damaged from the injury [e.g. fractures sustained, whether the injury was penetrating, non-penetrating or both, review of available imaging data] will be gathered from hospital records, where possible. Whether the participant received surgery following their admission [where, for what and when], and whether the participant received assisted mechanical ventilation will also be recorded.

### Injury Severity Scale [ISS]

The ISS will be retrospectively calculated for each participant, including those who withdraw. The ISS is a numerical score with a range 0-75, that is used to describe the overall severity of injury, and can be used for both multiple and single injuries. The score is calculated, based on the Abbreviated Injury Scale [AIS] scores.<sup>34 35</sup> Higher ISS scores have been associated with increased rates of mortality<sup>34 36 37</sup> and length/cost of hospital stay.<sup>38</sup> It is the recommended tool for summarising injury severity by the Trauma Audit and Research Network [TARN]. Both TARN and the National Institute for Clinical Excellence<sup>39</sup> recommend any participant with a score of >8 to be referred for rehabilitation.

### ***Pain characteristics***

#### Pain intensity

Pain intensity will be measured using an 11-point [0-10] Numerical Rating Scale [NRS], measuring current pain from 'no pain' to 'pain as bad as could be', from the Chronic Pain Grade Scale.<sup>40</sup> We will aim to assess *current* pain intensity at baseline, as frequently as every 48-hours while the participant is in hospital [depending upon participant accessibility and assessor availability], to gain accurate mean and rate-of-change data. At the 6 and 12 month assessment points, *current* pain intensity, as well as *average* and *worst* pain intensity related to the preceding 6 months, will be collected as part of the Chronic Pain Grade Scale. NRS scales are sensitive, reliable and valid instruments for pain intensity measurement,<sup>41-44</sup> and have been recommended for use in clinical populations in preference to visual analogue scales or verbal rating scales.<sup>45</sup> A 30% change on a pain NRS score is considered clinically meaningful.<sup>46-50</sup>

### Pain medication

The patient's pain medication [type and dosage] intake will be noted and the Medication Quantification Score [MQS], which is a reliable and validated score for quantifying analgesics, will be calculated to obtain a comparable metric for all different analgesics.<sup>51-53</sup> It enables characterisation of analgesics when many analgesics are involved and doses are irregular. It will be calculated for each non-opioid and opioid, based on weights assigned by medication class and dosage level [level 1 = sub-therapeutic dosage and/or on demand, level 2 = lower 50% of the therapeutic dose range, level 3 = upper 50% of the therapeutic dose range, level 4 = supra-therapeutic dose] using the 1998 detriment weights.<sup>54</sup> The detriment weights are summed by the dosage level to provide the final score. To provide a quantitative index for analgesics usage suitable for statistical analysis these scores will be summed.

### Pain extent

All participants will be requested to complete a pain drawing indicating their pain on two body charts, one reporting a frontal view of the body and one a dorsal view. We will also ask patients to mark their 'most painful' site. Pain drawing data will be collected using custom software developed with Matlab software, as described previously.<sup>33</sup> The software automatically calculates the number of shaded pixels from the pain drawing, which is defined as *pain extent*. Summaries of, and relationships between, pre-defined painful regions will also be evaluated.

### The painDETECT questionnaire

It is assumed that all post-trauma patients will have significant nociception at baseline, but the contribution of other pain-related mechanistic pathways will also be

1  
2  
3 assessed. The painDETECT questionnaire<sup>55</sup> will be used to facilitate the identification of  
4 neuropathic pain. It consists of 9 items [7 evaluating pain quality, 1 evaluating pain pattern,  
5 and 1 evaluating pain radiation], all of which contribute to an aggregate score [range: -1-38].  
6  
7 This aggregate score can be divided into three classifications that represent the likelihood of  
8 neuropathic pain: ‘unlikely’ [0-12], ‘ambiguous’ [13–18] and ‘likely’ [19–38].<sup>55</sup> Although  
9 developed as a screening questionnaire for neuropathic pain, painDETECT may also function  
10 as a measure of characteristics that indicate augmented central pain processing.<sup>55</sup> The  
11 painDETECT questionnaire has demonstrated good internal consistency [0.76]<sup>56</sup> and  
12 excellent test-re-test reliability<sup>57</sup> within 1-hour of consultation [ICC {model not reported}  
13 0.911] and 1-week post consultation [ICC {model not reported} 0.79].<sup>58</sup> Convergent validity  
14 has been demonstrated in comparison to pain severity,<sup>56 59</sup> health-related quality of life<sup>60</sup> and  
15 similar neuropathic pain screening tools.<sup>55</sup> As such, painDETECT outcomes will be measured  
16 at regular intervals while the participant is an inpatient in the hospital [subject to participant  
17 accessibility and assessor availability] to assess for emerging neuropathic pain and  
18 sensitization. Measurements will also be taken at all follow-up assessment points.  
19  
20  
21  
22  
23  
24  
25  
26  
27  
28  
29  
30  
31  
32  
33  
34  
35  
36

### 37 Quantitative sensory testing [QST]

38  
39 QST methods will be used to assess pain sensibility, throughout which measurements  
40 will be concealed from participants. Owing to the clinical heterogeneity of the post-trauma  
41 population, precise standardisation of test sites between participants will not be possible.  
42  
43 Instead, we have developed a standardised protocol that will be used to evaluate pain  
44 thresholds for multiple stimulus modalities [mechanical pressure, heat and cold] at the same  
45 sites in each participant. Each site where multi-modality pain threshold testing is performed  
46 will be within the receptive field of the same nerve root using described regions,<sup>61</sup> so that  
47 segmental cross-modality excitability may be compared. Pain thresholds will be measured at  
48  
49  
50  
51  
52  
53  
54  
55  
56  
57  
58  
59  
60

1  
2  
3 a 'local' and 'remote' site for each participant. We define local sites as being uninjured but  
4 within [or, if not accessible, as close as possible to] the same receptive field as the most  
5 painful injured tissue [e.g. skin over gastrocnemius in a participant with an ankle fracture]. By  
6  
7  
8  
9 contrast, we define remote sites as a distant, accessible, site from the receptive fields in which  
10 tissues are injured [e.g. skin over tibialis anterior in a participant without lower limb injury],  
11  
12  
13 and on the contralateral side of the body where injured tissue is unilateral. Where possible,  
14  
15  
16 remote sites will be a mirror-image of the local site [to allow for comparison of absolute  
17 values], but in a trauma population we are aware that this may not always be possible. For all  
18  
19  
20 threshold testing modalities, an ascending method of limits design<sup>62</sup> will be used, whereby  
21  
22  
23 stimulus intensity will begin at a low level and gradually increase until the participant first  
24  
25  
26 perceives pain. Participants will be instructed to push a button or tell the assessor when the  
27  
28  
29 sensation has changed from one of the stimulus alone [e.g. just pressure] to a sensation of  
30  
31  
32 both the stimulus and pain [e.g. pressure and pain]. Two consecutive assessments will be  
33  
34  
35 performed for each modality at each site, and the mean used for further analysis.<sup>63</sup> A  
36  
37  
38 minimum of 30-seconds inter-stimulus interval will be given between each threshold  
39  
40  
41 measurement within a single session. Measurements will be taken at baseline, while the  
42  
43  
44 participant is an inpatient in the hospital; we will aim to collect data as frequently as every  
45  
46  
47 48-hours to gain accurate rate-of-change data, but this will depend upon participant  
48  
49  
50 accessibility and assessor availability. To ensure pain thresholds are consistently measured at  
51  
52  
53 the same sites every session, sites will be labelled using a sterile, skin marking pen [Schuco  
54  
55  
56 Ltd, UK]. Because sites cannot be standardised between participants, the rates-of-change of  
57  
58  
59 these values will be used as candidate prognostic variables, to allow for comparisons between  
60  
61  
62 participants. The order of testing will be randomised by modality at each session to avoid  
63  
64  
65 order effects.

1  
2  
3 Thermal [heat and cold] pain thresholds will be measured using skin-contact  
4 stimulation, using the same thermode at the same sites, within specified local and remote  
5 dermatomes. Thermal pain threshold assessments will be performed by delivering thermal  
6 stimuli directly to the skin through a metal 30x30 mm Peltier thermode, using a TSA-II  
7 NeuroSensory Analyzer thermal stimulator and accompanying software [Medoc Ltd., Israel].  
8  
9 To evaluate heat pain threshold, temperature will be gradually increased, at a rate of 1°C/s  
10 from a 'neutral' baseline of 32°C, to a maximum temperature of 50.5°C to avoid thermal  
11 injury.<sup>64</sup> During each measurement, participants will be instructed to press a button when the  
12 stimulus becomes painful, and this will be documented as the threshold value. Once pain  
13 threshold is achieved [and recorded], the temperature will return to the baseline value at the  
14 same rate [1°C/s]. For cold pain threshold measurements, the temperature will be gradually  
15 reduced, at a rate of 1°C/s from the baseline of 30°C, to a minimum temperature of 0°C,<sup>64</sup>  
16 before also returning to baseline at a rate of 1°C/s.  
17  
18  
19  
20  
21  
22  
23  
24  
25  
26  
27  
28  
29  
30  
31  
32

33 Pressure pain thresholds will be measured at a local and remote site, using a pressure  
34 algometer [Somedic SenseLab AB, Sweden]. Skin and muscle tissue are simultaneously  
35 stimulated during pressure threshold testing; sites will therefore be chosen where a  
36 dermatome and myotome are likely to share a common nerve root innervation [e.g. skin over  
37 tibialis anterior]. The algometer has a circular contact tip of 1cm<sup>2</sup> area.<sup>65</sup> The tip will be  
38 applied perpendicular to the skin at a constant rate of pressure increase of 50kPa/s, until the  
39 first onset of pain. For each measurement, pressure will be unloaded at the same rate that it  
40 was loaded.  
41  
42  
43  
44  
45  
46  
47  
48  
49  
50  
51

52 To measure excitability of nociceptive pathways in response to mechanical stimuli, a  
53 series of repetitive, pressure stimulus 'pulses' will be applied via the algometer, with the aim  
54  
55  
56  
57  
58  
59  
60

1  
2  
3 of provoking temporal summation responses.<sup>66-68</sup> The peak pressure reached during each  
4 pulse will be the mean pressure pain threshold measured for that particular site, as described  
5 previously. A minimum of 2-minutes after all threshold tests have been completed, 10  
6 consecutive pressure pulses will be applied at the remote and local site. For each pulse,  
7 pressure will be gradually increased at a rate of 2N/cm<sup>2</sup>/s to the peak value, and maintained at  
8 that value for 1-second, before being released at the same rate. A 1-second inter-stimulus  
9 interval will be used between pulses. Pain intensity of the 1st, 5th, and 10th pulses will be  
10 rated on a numerical rating scale [0 being 'no pain' to 10 being 'pain as bad as could be']. In  
11 the event that participants indicate that pain has become intolerable, the sequence will be  
12 stopped immediately, and the NRS score and number of impulses performed at that point will  
13 be noted.

### 24 25 26 27 28 ***Biomarkers***

29  
30  
31  
32  
33 Serum levels of C-reactive protein [CRP] will be used as a biomarker for  
34 inflammation. CRP is an acute-phase response protein produced by hepatocytes and is  
35 usually found in concentrations of 0.3 to 1.7 mg/l<sup>69</sup>. Increased production is due to cytokine-  
36 dependent induction of synthesis and elevated levels may be detected within eight hours of a  
37 stimulus and can reach 500 mg/l<sup>70</sup>. Besides trauma,<sup>71</sup> elevated levels of CRP may be seen in  
38 conditions such as autoimmune disease, infection and malignancy. It has also been associated  
39 with acute sciatica.<sup>72</sup> The level of CRP usually peaks within 48 hours of the stimulus. In  
40 contrast, when the stimulus for increased production completely ceases, the circulating CRP  
41 concentration falls rapidly, at almost the rate of plasma CRP clearance.<sup>70</sup> A fall in serial  
42 measurements usually indicates resolution of the underlying process, while persisting  
43 elevated levels indicates ongoing inflammation.<sup>73</sup> Where possible, measurements of serum  
44  
45  
46  
47  
48  
49  
50  
51  
52  
53  
54  
55  
56  
57  
58  
59  
60

1  
2  
3 CRP will be repeatedly taken, to include 48-hours following trauma [to obtain the peak  
4  
5 value] and every subsequent 48-hours [to measure changes in value], while the participant is  
6  
7 an inpatient; absolute and rates of change of CRP values will be used as candidate prognostic  
8  
9 factors.<sup>74</sup>  
10  
11  
12  
13  
14  
15  
16  
17  
18  
19  
20  
21  
22  
23  
24  
25  
26  
27  
28  
29  
30  
31  
32  
33  
34  
35  
36  
37  
38  
39  
40  
41  
42  
43  
44  
45  
46  
47  
48  
49  
50  
51  
52  
53  
54  
55  
56  
57  
58  
59  
60

For peer review only

**REFERENCES**

1. Stewart AL, Greenfield S, Hays RD, et al. Functional status and well-being of patients with chronic conditions. Results from the Medical Outcomes Study. *JAMA* 1989;262(7):907-13.
2. Ware JE, Jr., Sherbourne CD. The MOS 36-item short-form health survey (SF-36). I. Conceptual framework and item selection. *Med Care* 1992;30(6):473-83.
3. Hays RD, Sherbourne CD, Mazel RM. The RAND 36-Item Health Survey 1.0. *Health Econ* 1993;2(3):217-27.
4. McHorney CA, Ware JE, Jr., Raczek AE. The MOS 36-Item Short-Form Health Survey (SF-36): II. Psychometric and clinical tests of validity in measuring physical and mental health constructs. *Med Care* 1993;31(3):247-63.
5. Revell MP, Pynsent, P.B., Abudu, A., Fairbank, J.C.T. . Trauma Scores and Trauma Outcome Measures *Trauma* 2003;5:61-70.
6. Ware J. SF-36 Health Survey Updated. *Spine* 2000;25(24):3130-39.
7. Dattani R, Slobogean, G.P., O'Brien, P.J., Broekhuysse, H.M., Blachut, P.A., Guy, P., Lefavivre, K.A. Psychometric Analysis of Measuring Functional Outcomes in Tibial Plateau Fractures using the Short Form (SF-36), Short Musculoskeletal Function Assessment (SMFA) and the Western Ontario McMaster Osteoarthritis (WOMAC) Questionnaires. *Injury Int J Care Injured* 2013;44:825-29.
8. Brooks R. EuroQol: the current state of play. *Health Policy* 1996;37(1):53-72.
9. Janssen MF, Birnie E, Haagsma JA, et al. Comparing the standard EQ-5D three-level system with a five-level version. *Value Health* 2008;11(2):275-84. doi: 10.1111/j.1524-4733.2007.00230.x
10. Janssen MF, Pickard AS, Golicki D, et al. Measurement properties of the EQ-5D-5L compared to the EQ-5D-3L across eight patient groups: a multi-country study. *Qual Life Res* 2013;22(7):1717-27. doi: 10.1007/s11136-012-0322-4
11. Mahoney FI, Barthel DW. Functional Evaluation: The Barthel Index. *Md State Med J* 1965;14:61-5.
12. Shah S, Vanclay F, Cooper B. Improving the sensitivity of the Barthel Index for stroke rehabilitation. *J Clin Epidemiol* 1989;42(8):703-9.
13. Hseuh IP, Lee, M.M., Hsieh, C.L. . Psychometric Characteristics of the Barthel Activities of Daily Living Index in Stroke Patients *J Formos Med Assoc* 2001;100(526-532)

- 1  
2  
3 14. Hseuh IP, Lin, J.H., Jeng, J.S., Hsieh, C.L. Comparison of the Psychometric  
4 Characteristics of the Functional Independence Measure, 5 Item Barthel Index and 10  
5 Item Barthel Index in Patients with Stroke. *J Neurol Neurosurg Psychiatry*  
6 2002;73:188-90.
- 7  
8  
9 15. Hsieh YW, Wang, C.H., Wu, S.C., Chen, P.C., Sheu, C.F., Hsieh, C.L. . Establishing the  
10 Minimally Clinically Important Difference of the Barthel Index in Stroke Patients.  
11 *Neurorehabilitation and Neural Repair* 2007;21(3):233-38.
- 12  
13  
14 16. Hobart JC, Thompson AJ. The five item Barthel index. *J Neurol Neurosurg Psychiatry*  
15 2001;71(2):225-30.
- 16  
17  
18 17. Eriksen HR, Ihlebaek C, Ursin H. A scoring system for subjective health complaints  
19 (SHC). *Scand J Public Health* 1999;27(1):63-72.
- 20  
21  
22 18. Zigmond AS, Snaith RP. The hospital anxiety and depression scale. *Acta Psychiatr Scand*  
23 1983;67(6):361-70.
- 24  
25  
26 19. Bjelland I, Dahl AA, Haug TT, et al. The validity of the Hospital Anxiety and Depression  
27 Scale. An updated literature review. *J Psychosom Res* 2002;52(2):69-77.
- 28  
29  
30 20. Wang W, Chair, S.Y., Thompson, D.R., Twinn, S.F. A Psychometric Evaluation of the  
31 Chinese Version of the Hospital Anxiety and Depression Scale in Patients with  
32 Coronary Heart Disease *Journal of Clinical Nursing* 2009;18:1908-15.
- 33  
34  
35 21. Sullivan MJL BS, Pivik J. The Pain Catastrophizing Scale: Development and validation. .  
36 *Psychological Assessment* 1995;7(4):524-32.
- 37  
38  
39 22. Fernandes L, Storheim, K., Lochting, I., Grotle, M. Cross Cultural Adaption and  
40 Validation of the Norwegian Pain Catastrophizing Scale in Patients with Low Back  
41 Pain *BMC Musculoskeletal Disorders* 2012;13:111-20.
- 42  
43  
44 23. Lopes RA, Dias RC, Queiroz BZ, et al. Psychometric properties of the Brazilian version  
45 of the Pain Catastrophizing Scale for acute low back pain. *Arq Neuropsiquiatr*  
46 2015;73(5):436-44. doi: 10.1590/0004-282X20150026
- 47  
48  
49 24. Woby SR, Roach NK, Urmston M, et al. Psychometric properties of the TSK-11: a  
50 shortened version of the Tampa Scale for Kinesiophobia. *Pain* 2005;117(1-2):137-44.  
51 doi: 10.1016/j.pain.2005.05.029
- 52  
53  
54 25. Miller RP KS, Todd D. The Tampa Scale: a measure of kinesiophobia. *Clin J Pain*  
55 1991;7(1):51-52.
- 56  
57  
58 26. Swinkels-Meewisse EJCM, Swinkels, R.A.H.M., Verbeek, A.L.M., Vlaeyen, J.W.S. .  
59 Psychometric Propertieis of the Tampa Scale for Kinesiophobia and the Fear  
60

- 1  
2  
3 Avoidance Beliefs Questionnaire in Acute Low Back Pain *Manual Therapy*  
4 2003;8(1):29-36.  
5  
6 27. Kall LB. Psychological determinants of quality of life in patients with whiplash  
7 associated disorders-a prospective study. *Disabil Rehabil* 2009;31(3):227-36. doi:  
8 10.1080/09638280801912030  
9  
10 28. M.K. N. The pain self-efficacy questionnaire: Taking pain into account. *Eur J Pain*  
11 2007;11(2):153-63.  
12  
13 29. Paul Campbell NEF, Elaine Thomas, and Kate M. Dunn. Prognostic Indicators of Low  
14 Back Pain in Primary Care: Five-Year Prospective Study. *J Pain* 2013;14(8):873-83.  
15  
16 30. Horowitz M, Wilner N, Alvarez W. Impact of Event Scale: a measure of subjective stress.  
17 *Psychosom Med* 1979;41(3):209-18.  
18  
19 31. Beck JG, Grant DM, Read JP, et al. The impact of event scale-revised: psychometric  
20 properties in a sample of motor vehicle accident survivors. *J Anxiety Disord*  
21 2008;22(2):187-98. doi: 10.1016/j.janxdis.2007.02.007  
22  
23 32. Creamer M, Bell R, Failla S. Psychometric properties of the Impact of Event Scale -  
24 Revised. *Behav Res Ther* 2003;41(12):1489-96.  
25  
26 33. Barbero M, Mores, F., Leoni, D., Gatti, R., Egloff, M., Falla, D. Test-retest reliability of  
27 pain extent and pain location using a novel method for pain drawing analysis.  
28 *European Journal of Pain* 2015;19:1129-38.  
29  
30 34. Baker SP, O'Neill B. The injury severity score: an update. *J Trauma* 1976;16(11):882-5.  
31  
32 35. Akmal M, Trivedi R, Sutcliffe J. Functional outcome in trauma patients with spinal  
33 injury. *Spine (Phila Pa 1976)* 2003;28(2):180-5. doi:  
34 10.1097/01.BRS.0000041577.12233.96  
35  
36 36. Baker SP, O'Neill B, Haddon W, Jr., et al. The injury severity score: a method for  
37 describing patients with multiple injuries and evaluating emergency care. *J Trauma*  
38 1974;14(3):187-96.  
39  
40 37. Linn S. The injury severity score--importance and uses. *Ann Epidemiol* 1995;5(6):440-6.  
41  
42 38. Sears JM, Blonar L, Bowman SM. Predicting work-related disability and medical cost  
43 outcomes: a comparison of injury severity scoring methods. *Injury* 2014;45(1):16-22.  
44 doi: 10.1016/j.injury.2012.12.024  
45  
46 39. NICE. Low back pain and sciatica in over 16s: assessment and management  
47  
48 NICE guideline [NG59]: National Institute for Health and Care Excellence, 2016.  
49  
50  
51  
52  
53  
54  
55  
56  
57  
58  
59  
60

- 1  
2  
3 40. Von Korff M, Ormel J, Keefe FJ, et al. Grading the severity of chronic pain. *Pain*  
4 1992;50(2):133-49.  
5  
6 41. Jensen MP, McFarland CA. Increasing the reliability and validity of pain intensity  
7 measurement in chronic pain patients. *Pain* 1993;55(2):195-203.  
8  
9 42. Jensen MP, Turner, J.A. and Romano, J.M. . What is the maximum number of levels  
10 needed in pain intensity measurement? . *Pain* 1994;58:387-92.  
11  
12 43. Jensen MP, Turner, L.R., Turner, J.A. and Romano, J.M. The use of multiple-item scales  
13 for pain intensity measurement in chronic pain patients. *Pain* 1996;67:35-40.  
14  
15 44. Jensen MP, Turner JA, Romano JM, et al. Comparative reliability and validity of chronic  
16 pain intensity measures. *Pain* 1999;83(2):157-62.  
17  
18 45. Von Korff M. Epidemiological and survey methods – assessment of chronic pain. In  
19 Turk, D.C. and Melzack, R., editors, *Handbook of Pain Assessment*. . New York,  
20 USA: Guildford Press 2001:603-18.  
21  
22 46. Farrar JT, Young JP, Jr., LaMoreaux L, et al. Clinical importance of changes in chronic  
23 pain intensity measured on an 11-point numerical pain rating scale. *Pain*  
24 2001;94(2):149-58.  
25  
26 47. Salaffi F, Stancati A, Silvestri CA, et al. Minimal clinically important changes in chronic  
27 musculoskeletal pain intensity measured on a numerical rating scale. *Eur J Pain*  
28 2004;8(4):283-91. doi: 10.1016/j.ejpain.2003.09.004  
29  
30 48. Childs JD, Piva SR, Fritz JM. Responsiveness of the numeric pain rating scale in patients  
31 with low back pain. *Spine (Phila Pa 1976)* 2005;30(11):1331-4.  
32  
33 49. Ostelo RW, Deyo, R.A., Stratford, P., Waddell, G., Croft, P., Von Korff, M., Bouter,  
34 L.M. and Henrica, C. Interpreting change scores for pain and functional status in low  
35 back pain: towards international consensus regarding minimal important change.  
36 *Spine* 2008;33(1):90-94.  
37  
38 50. Michener LA, Snyder AR, Leggin BG. Responsiveness of the numeric pain rating scale in  
39 patients with shoulder pain and the effect of surgical status. *J Sport Rehabil*  
40 2011;20(1):115-28.  
41  
42 51. Masters Steedman S, Middaugh SJ, Kee WG, et al. Chronic-pain medications:  
43 equivalence levels and method of quantifying usage. *Clin J Pain* 1992;8(3):204-14.  
44  
45 52. Harden RN, Weinland SR, Remble TA, et al. Medication Quantification Scale Version  
46 III: update in medication classes and revised detriment weights by survey of  
47 American Pain Society Physicians. *J Pain* 2005;6(6):364-71. doi:  
48 10.1016/j.jpain.2005.01.350  
49  
50  
51  
52  
53  
54  
55  
56  
57  
58  
59  
60

- 1  
2  
3 53. Gallizzi M GC, Harden RN, Stanos S, Khan A. Medication Quantification Scale Version  
4 III: internal validation of detriment weights using a chronic pain population. . *Pain*  
5 *Pract* 2008;8(1):1-4.  
6  
7  
8 54. KJ S, WG K, S S, et al. Medication quantification scores and evaluation of patient  
9 pharmacology profiles. *Current Review of Pain* 1998;2(3):171–74.  
10  
11 55. Freynhagen R, Baron R, Gockel U, et al. painDETECT: a new screening questionnaire to  
12 identify neuropathic components in patients with back pain. *Curr Med Res Opin*  
13 2006;22(10):1911-20. doi: 10.1185/030079906X132488  
14  
15 56. Cappelleri JC, Koduru V, Bienen EJ, et al. A cross-sectional study examining the  
16 psychometric properties of the painDETECT measure in neuropathic pain. *J Pain Res*  
17 2015;8(8):159-67. doi: 10.2147/JPR.S80046  
18  
19 57. Keller T, Freynhagen R, Tolle TR, et al. A retrospective analysis of the long-term test-  
20 retest stability of pain descriptors of the painDETECT questionnaire. *Curr Med Res*  
21 *Opin* 2016;32(2):343-9. doi: 10.1185/03007995.2015.1125869  
22  
23 58. Tampin B, Bohne T, Callan M, et al. Reliability of the English version of the  
24 painDETECT questionnaire. *Curr Med Res Opin* 2017;33(4):741-48. doi:  
25 10.1080/03007995.2017.1278682  
26  
27 59. Sadosky A, Koduru V, Bienen EJ, et al. Characterizing individual painDETECT  
28 symptoms by average pain severity. *Clinicoecon Outcomes Res* 2016;8:361-6. doi:  
29 10.2147/CEOR.S105402  
30  
31 60. Cappelleri JC, Koduru V, Bienen EJ, et al. Mapping painDETECT, a neuropathic pain  
32 screening tool, to the EuroQol (EQ-5D-3L). *Qual Life Res* 2017;26(2):467-77. doi:  
33 10.1007/s11136-016-1379-2  
34  
35 61. M OB. Aids to the Examination of the Peripheral Nervous System: Saunders (Elsevier)  
36 2010.  
37  
38 62. T. Palmer DJM, Wilma M. Steedman, John Ravey, S. C-and A $\delta$ -fibre mediated thermal  
39 perception: response to rate of temperature change using method of limits. .  
40 *Somatosensory & motor research* 2000;17(4):325-33.  
41  
42 63. Chesterton LS SJ, Wright CC, Foster NE. Interrater reliability of algometry in measuring  
43 pressure pain thresholds in healthy humans, using multiple raters. *Clin J Pain*  
44 2007;23(9):760-6.  
45  
46 64. Knutti IA SM, Opsommer E. Test-retest reliability of thermal quantitative sensory testing  
47 on two sites within the L5 dermatome of the lumbar spine and lower extremity.  
48 *Neurosci Lett* 2014;5(579):157-62.  
49  
50  
51  
52  
53  
54  
55  
56  
57  
58  
59  
60

- 1  
2  
3 65. Greenspan JD, McGillis SL. Stimulus features relevant to the perception of sharpness and  
4 mechanically evoked cutaneous pain. *Somatosens Mot Res* 1991;8(2):137-47.  
5  
6 66. Sarlani E, Greenspan JD. Gender differences in temporal summation of mechanically  
7 evoked pain. *Pain* 2002;97(1-2):163-9.  
8  
9 67. Nie H, Arendt-Nielsen L, Andersen H, et al. Temporal summation of pain evoked by  
10 mechanical stimulation in deep and superficial tissue. *J Pain* 2005;6(6):348-55. doi:  
11 10.1016/j.jpain.2005.01.352  
12  
13 68. Nie H, Arendt-Nielsen L, Madeleine P, et al. Enhanced temporal summation of pressure  
14 pain in the trapezius muscle after delayed onset muscle soreness. *Exp Brain Res*  
15 2006;170(2):182-90. doi: 10.1007/s00221-005-0196-6  
16  
17 69. Whicher JT ES. Acute phase proteins. *Hosp Update* 1990:899-905.  
18  
19 70. Pepys MB, Hirschfield GM. C-reactive protein: a critical update. *J Clin Invest*  
20 2003;111(12):1805-12. doi: 10.1172/JCI18921  
21  
22 71. Gosling P, Dickson GR. Serum c-reactive protein in patients with serious trauma. *Injury*  
23 1992;23(7):483-6.  
24  
25 72. Sturmer T, Raum E, Buchner M, et al. Pain and high sensitivity C reactive protein in  
26 patients with chronic low back pain and acute sciatic pain. *Ann Rheum Dis*  
27 2005;64(6):921-5. doi: 10.1136/ard.2004.027045  
28  
29 73. Giannoudis PV HF, Pape HC. . Inflammatory serum markers in patients with multiple  
30 trauma. Can they predict outcome? *J Bone Joint Surg Br* 2004;86(3):313-23.  
31  
32 74. Barma M, Goodbrand, J.A., Donnan, P.T., McGilchrist, M.M., Frost, H., McMurdo, M.E.  
33 and Witham, M.D. Slower Decline in C-Reactive Protein after an Inflammatory Insult  
34 Is Associated with Longer Survival in Older Hospitalised Patients. . *PloS one*  
35 2016;11(7):e0159412.  
36  
37  
38  
39  
40  
41  
42  
43  
44  
45  
46  
47  
48  
49  
50  
51  
52  
53  
54  
55  
56  
57  
58  
59  
60



SPIRIT 2013 Checklist: Recommended items to address in a clinical trial protocol and related documents\*

| Section/item                      | Item No | Description                                                                                                                                                                                                                                                                                        |
|-----------------------------------|---------|----------------------------------------------------------------------------------------------------------------------------------------------------------------------------------------------------------------------------------------------------------------------------------------------------|
| <b>Administrative information</b> |         |                                                                                                                                                                                                                                                                                                    |
| Title                             | 1       | Descriptive title identifying the study design, population, interventions, and, if applicable, trial acronym – Page 1                                                                                                                                                                              |
| Trial registration                | 2a      | Trial identifier and registry name. If not yet registered, name of intended registry – N/A                                                                                                                                                                                                         |
|                                   | 2b      | All items from the World Health Organization Trial Registration Data Set – N/A                                                                                                                                                                                                                     |
| Protocol version                  | 3       | Date and version identifier – Page 1                                                                                                                                                                                                                                                               |
| Funding                           | 4       | Sources and types of financial, material, and other support – Page 25                                                                                                                                                                                                                              |
| Roles and responsibilities        | 5a      | Names, affiliations, and roles of protocol contributors – Pages 1, 25                                                                                                                                                                                                                              |
|                                   | 5b      | Name and contact information for the trial sponsor – Page 25                                                                                                                                                                                                                                       |
|                                   | 5c      | Role of study sponsor and funders, if any, in study design; collection, management, analysis, and interpretation of data; writing of the report; and the decision to submit the report for publication, including whether they will have ultimate authority over any of these activities – Page 25 |
|                                   | 5d      | Composition, roles, and responsibilities of the coordinating centre, steering committee, endpoint adjudication committee, data management team, and other individuals or groups overseeing the trial, if applicable (see Item 21a for data monitoring committee) – Page 25                         |
| <b>Introduction</b>               |         |                                                                                                                                                                                                                                                                                                    |
| Background and rationale          | 6a      | Description of research question and justification for undertaking the trial, including summary of relevant studies (published and unpublished) examining benefits and harms for each intervention – Page 5 (introduction, page 6 (aims and objectives)                                            |
|                                   | 6b      | Explanation for choice of comparators – Supplementary file                                                                                                                                                                                                                                         |
| Objectives                        | 7       | Specific objectives or hypotheses (Page 6)                                                                                                                                                                                                                                                         |

1  
2  
3  
4  
5  
6  
7  
8  
9  
10  
11  
12  
13  
14  
15  
16  
17  
18  
19  
20  
21  
22  
23  
24  
25  
26  
27  
28  
29  
30  
31  
32  
33  
34  
35  
36  
37  
38  
39  
40  
41  
42  
43  
44  
45  
46  
47  
48  
49  
50  
51  
52  
53  
54  
55  
56  
57  
58  
59  
60

|              |   |                                                                                                                                                                                                                    |
|--------------|---|--------------------------------------------------------------------------------------------------------------------------------------------------------------------------------------------------------------------|
| Trial design | 8 | Description of trial design including type of trial (eg, parallel group, crossover, factorial, single group), allocation ratio, and framework (eg, superiority, equivalence, noninferiority, exploratory) – Page 7 |
|--------------|---|--------------------------------------------------------------------------------------------------------------------------------------------------------------------------------------------------------------------|

### **Methods: Participants, interventions, and outcomes**

|               |   |                                                                                                                                                                                             |
|---------------|---|---------------------------------------------------------------------------------------------------------------------------------------------------------------------------------------------|
| Study setting | 9 | Description of study settings (eg, community clinic, academic hospital) and list of countries where data will be collected. Reference to where list of study sites can be obtained – Page 7 |
|---------------|---|---------------------------------------------------------------------------------------------------------------------------------------------------------------------------------------------|

|                      |    |                                                                                                                                                                                                           |
|----------------------|----|-----------------------------------------------------------------------------------------------------------------------------------------------------------------------------------------------------------|
| Eligibility criteria | 10 | Inclusion and exclusion criteria for participants. If applicable, eligibility criteria for study centres and individuals who will perform the interventions (eg, surgeons, psychotherapists) – Pages 8-10 |
|----------------------|----|-----------------------------------------------------------------------------------------------------------------------------------------------------------------------------------------------------------|

|               |     |                                                                                                                                  |
|---------------|-----|----------------------------------------------------------------------------------------------------------------------------------|
| Interventions | 11a | Interventions for each group with sufficient detail to allow replication, including how and when they will be administered – N/A |
|---------------|-----|----------------------------------------------------------------------------------------------------------------------------------|

|  |     |                                                                                                                                                                                                      |
|--|-----|------------------------------------------------------------------------------------------------------------------------------------------------------------------------------------------------------|
|  | 11b | Criteria for discontinuing or modifying allocated interventions for a given trial participant (eg, drug dose change in response to harms, participant request, or improving/worsening disease) – N/A |
|--|-----|------------------------------------------------------------------------------------------------------------------------------------------------------------------------------------------------------|

|  |     |                                                                                                                                                         |
|--|-----|---------------------------------------------------------------------------------------------------------------------------------------------------------|
|  | 11c | Strategies to improve adherence to intervention protocols, and any procedures for monitoring adherence (eg, drug tablet return, laboratory tests) – N/A |
|--|-----|---------------------------------------------------------------------------------------------------------------------------------------------------------|

|  |     |                                                                                                     |
|--|-----|-----------------------------------------------------------------------------------------------------|
|  | 11d | Relevant concomitant care and interventions that are permitted or prohibited during the trial – N/A |
|--|-----|-----------------------------------------------------------------------------------------------------|

|          |    |                                                                                                                                                                                                                                                                                                                                                                                                                                                       |
|----------|----|-------------------------------------------------------------------------------------------------------------------------------------------------------------------------------------------------------------------------------------------------------------------------------------------------------------------------------------------------------------------------------------------------------------------------------------------------------|
| Outcomes | 12 | Primary, secondary, and other outcomes, including the specific measurement variable (eg, systolic blood pressure), analysis metric (eg, change from baseline, final value, time to event), method of aggregation (eg, median, proportion), and time point for each outcome. Explanation of the clinical relevance of chosen efficacy and harm outcomes is strongly recommended – Page 10 (primary outcome), Supplementary file (candidate predictors) |
|----------|----|-------------------------------------------------------------------------------------------------------------------------------------------------------------------------------------------------------------------------------------------------------------------------------------------------------------------------------------------------------------------------------------------------------------------------------------------------------|

|                      |    |                                                                                                                                                                                               |
|----------------------|----|-----------------------------------------------------------------------------------------------------------------------------------------------------------------------------------------------|
| Participant timeline | 13 | Time schedule of enrolment, interventions (including any run-ins and washouts), assessments, and visits for participants. A schematic diagram is highly recommended (see Figure) – Pages 8-10 |
|----------------------|----|-----------------------------------------------------------------------------------------------------------------------------------------------------------------------------------------------|

|             |    |                                                                                                                                                                                                     |
|-------------|----|-----------------------------------------------------------------------------------------------------------------------------------------------------------------------------------------------------|
| Sample size | 14 | Estimated number of participants needed to achieve study objectives and how it was determined, including clinical and statistical assumptions supporting any sample size calculations – Pages 14-15 |
|-------------|----|-----------------------------------------------------------------------------------------------------------------------------------------------------------------------------------------------------|

|             |    |                                                                                                   |
|-------------|----|---------------------------------------------------------------------------------------------------|
| Recruitment | 15 | Strategies for achieving adequate participant enrolment to reach target sample size – Pages 14-15 |
|-------------|----|---------------------------------------------------------------------------------------------------|

### **Methods: Assignment of interventions (for controlled trials)**

Allocation:

|    |                |     |                                                                         |
|----|----------------|-----|-------------------------------------------------------------------------|
| 1  |                |     |                                                                         |
| 2  | Sequence       | 16a | Method of generating the allocation sequence (eg, computer-             |
| 3  | generation     |     | generated random numbers), and list of any factors for stratification.  |
| 4  |                |     | To reduce predictability of a random sequence, details of any planned   |
| 5  |                |     | restriction (eg, blocking) should be provided in a separate document    |
| 6  |                |     | that is unavailable to those who enrol participants or assign           |
| 7  |                |     | interventions – N/A                                                     |
| 8  |                |     |                                                                         |
| 9  | Allocation     | 16b | Mechanism of implementing the allocation sequence (eg, central          |
| 10 | concealment    |     | telephone; sequentially numbered, opaque, sealed envelopes),            |
| 11 | mechanism      |     | describing any steps to conceal the sequence until interventions are    |
| 12 |                |     | assigned – N/A                                                          |
| 13 |                |     |                                                                         |
| 14 | Implementation | 16c | Who will generate the allocation sequence, who will enrol participants, |
| 15 |                |     | and who will assign participants to interventions – N/A                 |
| 16 |                |     |                                                                         |
| 17 | Blinding       | 17a | Who will be blinded after assignment to interventions (eg, trial        |
| 18 | (masking)      |     | participants, care providers, outcome assessors, data analysts), and    |
| 19 |                |     | how N/A                                                                 |
| 20 |                |     |                                                                         |
| 21 |                | 17b | If blinded, circumstances under which unblinding is permissible, and    |
| 22 |                |     | procedure for revealing a participant's allocated intervention during   |
| 23 |                |     | the trial – N/A                                                         |
| 24 |                |     |                                                                         |
| 25 |                |     |                                                                         |

### Methods: Data collection, management, and analysis

|    |                 |     |                                                                          |
|----|-----------------|-----|--------------------------------------------------------------------------|
| 26 |                 |     |                                                                          |
| 27 |                 |     |                                                                          |
| 28 | Data collection | 18a | Plans for assessment and collection of outcome, baseline, and other      |
| 29 | methods         |     | trial data, including any related processes to promote data quality (eg, |
| 30 |                 |     | duplicate measurements, training of assessors) and a description of      |
| 31 |                 |     | study instruments (eg, questionnaires, laboratory tests) along with      |
| 32 |                 |     | their reliability and validity, if known. Reference to where data        |
| 33 |                 |     | collection forms can be found, if not in the protocol – Pages 10-14,     |
| 34 |                 |     | Supplementary file                                                       |
| 35 |                 |     |                                                                          |
| 36 |                 | 18b | Plans to promote participant retention and complete follow-up,           |
| 37 |                 |     | including list of any outcome data to be collected for participants who  |
| 38 |                 |     | discontinue or deviate from intervention protocols – Page 9              |
| 39 |                 |     | (withdrawals)                                                            |
| 40 |                 |     |                                                                          |
| 41 |                 |     |                                                                          |
| 42 | Data            | 19  | Plans for data entry, coding, security, and storage, including any       |
| 43 | management      |     | related processes to promote data quality (eg, double data entry;        |
| 44 |                 |     | range checks for data values). Reference to where details of data        |
| 45 |                 |     | management procedures can be found, if not in the protocol – Page        |
| 46 |                 |     | 14                                                                       |
| 47 |                 |     |                                                                          |
| 48 | Statistical     | 20a | Statistical methods for analysing primary and secondary outcomes.        |
| 49 | methods         |     | Reference to where other details of the statistical analysis plan can be |
| 50 |                 |     | found, if not in the protocol – Page 15-16                               |
| 51 |                 |     |                                                                          |
| 52 |                 | 20b | Methods for any additional analyses (eg, subgroup and adjusted           |
| 53 |                 |     | analyses) – Page 16 (screening tool development and validation)          |
| 54 |                 |     |                                                                          |
| 55 |                 |     |                                                                          |
| 56 |                 |     |                                                                          |
| 57 |                 |     |                                                                          |
| 58 |                 |     |                                                                          |
| 59 |                 |     |                                                                          |
| 60 |                 |     |                                                                          |

1  
2  
3  
4  
5  
6  
7  
8  
9  
10  
11  
12  
13  
14  
15  
16  
17  
18  
19  
20  
21  
22  
23  
24  
25  
26  
27  
28  
29  
30  
31  
32  
33  
34  
35  
36  
37  
38  
39  
40  
41  
42  
43  
44  
45  
46  
47  
48  
49  
50  
51  
52  
53  
54  
55  
56  
57  
58  
59  
60

20c Definition of analysis population relating to protocol non-adherence (eg, as randomised analysis), and any statistical methods to handle missing data (eg, multiple imputation) – Page 15 (imputation)

### Methods: Monitoring

Data monitoring 21a Composition of data monitoring committee (DMC); summary of its role and reporting structure; statement of whether it is independent from the sponsor and competing interests; and reference to where further details about its charter can be found, if not in the protocol. Alternatively, an explanation of why a DMC is not needed – N/A

21b Description of any interim analyses and stopping guidelines, including who will have access to these interim results and make the final decision to terminate the trial – N/A

Harms 22 Plans for collecting, assessing, reporting, and managing solicited and spontaneously reported adverse events and other unintended effects of trial interventions or trial conduct – N/A

Auditing 23 Frequency and procedures for auditing trial conduct, if any, and whether the process will be independent from investigators and the sponsor – N/A

### Ethics and dissemination

Research ethics approval 24 Plans for seeking research ethics committee/institutional review board (REC/IRB) approval – Pages 19-20

Protocol amendments 25 Plans for communicating important protocol modifications (eg, changes to eligibility criteria, outcomes, analyses) to relevant parties (eg, investigators, REC/IRBs, trial participants, trial registries, journals, regulators) – N/A

Consent or assent 26a Who will obtain informed consent or assent from potential trial participants or authorised surrogates, and how (see Item 32) – Pages 9-10

26b Additional consent provisions for collection and use of participant data and biological specimens in ancillary studies, if applicable – N/A

Confidentiality 27 How personal information about potential and enrolled participants will be collected, shared, and maintained in order to protect confidentiality before, during, and after the trial – Page 14

Declaration of interests 28 Financial and other competing interests for principal investigators for the overall trial and each study site – Page 25

Access to data 29 Statement of who will have access to the final trial dataset, and disclosure of contractual agreements that limit such access for investigators – Not present

|    |                   |     |                                                                              |
|----|-------------------|-----|------------------------------------------------------------------------------|
| 1  |                   |     |                                                                              |
| 2  | Ancillary and     | 30  | Provisions, if any, for ancillary and post-trial care, and for               |
| 3  | post-trial care   |     | compensation to those who suffer harm from trial participation – N/A         |
| 4  |                   |     |                                                                              |
| 5  | Dissemination     | 31a | Plans for investigators and sponsor to communicate trial results to          |
| 6  | policy            |     | participants, healthcare professionals, the public, and other relevant       |
| 7  |                   |     | groups (eg, via publication, reporting in results databases, or other        |
| 8  |                   |     | data sharing arrangements), including any publication restrictions –         |
| 9  |                   |     | N/A                                                                          |
| 10 |                   |     |                                                                              |
| 11 |                   | 31b | Authorship eligibility guidelines and any intended use of professional       |
| 12 |                   |     | writers – N/A                                                                |
| 13 |                   |     |                                                                              |
| 14 |                   | 31c | Plans, if any, for granting public access to the full protocol, participant- |
| 15 |                   |     | level dataset, and statistical code – N/A                                    |
| 16 |                   |     |                                                                              |
| 17 | <b>Appendices</b> |     |                                                                              |
| 18 |                   |     |                                                                              |
| 19 | Informed consent  | 32  | Model consent form and other related documentation given to                  |
| 20 | materials         |     | participants and authorised surrogates – N/A                                 |
| 21 |                   |     |                                                                              |
| 22 | Biological        | 33  | Plans for collection, laboratory evaluation, and storage of biological       |
| 23 | specimens         |     | specimens for genetic or molecular analysis in the current trial and for     |
| 24 |                   |     | future use in ancillary studies, if applicable – N/A                         |
| 25 |                   |     |                                                                              |

---

26 \*It is strongly recommended that this checklist be read in conjunction with the SPIRIT 2013  
 27 Explanation & Elaboration for important clarification on the items. Amendments to the  
 28 protocol should be tracked and dated. The SPIRIT checklist is copyrighted by the SPIRIT  
 29 Group under the Creative Commons "[Attribution-NonCommercial-NoDerivs 3.0 Unported](https://creativecommons.org/licenses/by-nc-nd/3.0/)"  
 30 license.  
 31  
 32  
 33  
 34  
 35  
 36  
 37  
 38  
 39  
 40  
 41  
 42  
 43  
 44  
 45  
 46  
 47  
 48  
 49  
 50  
 51  
 52  
 53  
 54  
 55  
 56  
 57  
 58  
 59  
 60

# BMJ Open

## DEVELOPMENT OF A SCREENING TOOL TO PREDICT THE RISK OF CHRONIC PAIN AND DISABILITY FOLLOWING MUSCULOSKELETAL TRAUMA: PROTOCOL FOR A PROSPECTIVE OBSERVATIONAL STUDY

|                                 |                                                                                                                                                                                                                                                                                                                                                                                                                                                                                                                                                                                                                                                                                                                                                                                                                                            |
|---------------------------------|--------------------------------------------------------------------------------------------------------------------------------------------------------------------------------------------------------------------------------------------------------------------------------------------------------------------------------------------------------------------------------------------------------------------------------------------------------------------------------------------------------------------------------------------------------------------------------------------------------------------------------------------------------------------------------------------------------------------------------------------------------------------------------------------------------------------------------------------|
| Journal:                        | <i>BMJ Open</i>                                                                                                                                                                                                                                                                                                                                                                                                                                                                                                                                                                                                                                                                                                                                                                                                                            |
| Manuscript ID                   | bmjopen-2017-017876.R1                                                                                                                                                                                                                                                                                                                                                                                                                                                                                                                                                                                                                                                                                                                                                                                                                     |
| Article Type:                   | Protocol                                                                                                                                                                                                                                                                                                                                                                                                                                                                                                                                                                                                                                                                                                                                                                                                                                   |
| Date Submitted by the Author:   | 19-Oct-2017                                                                                                                                                                                                                                                                                                                                                                                                                                                                                                                                                                                                                                                                                                                                                                                                                                |
| Complete List of Authors:       | Rushton, Alison; University of Birmingham, School of Sport, Exercise and Rehabilitation Sciences<br>Evans, David; University of Birmingham, School of Sport, Exercise and Rehabilitation Sciences<br>Middlebrook, Nicola; University of Birmingham, School of Sport, Exercise and Rehabilitation Sciences<br>Heneghan, Nicola; University of Birmingham, School of Sport, Exercise and Rehabilitation Sciences<br>Small, Charlotte; University of Birmingham, NIHR Surgical Reconstruction & Microbiology Research Centre<br>Lord, Janet; University of Birmingham, NIHR Surgical Reconstruction & Microbiology Research Centre<br>Patel, Jaimin; University of Birmingham, NIHR Surgical Reconstruction & Microbiology Research Centre<br>Falla, Deborah; University of Birmingham, School of Sport, Exercise and Rehabilitation Sciences |
| <b>Primary Subject Heading</b>: | Rehabilitation medicine                                                                                                                                                                                                                                                                                                                                                                                                                                                                                                                                                                                                                                                                                                                                                                                                                    |
| Secondary Subject Heading:      | Medical management                                                                                                                                                                                                                                                                                                                                                                                                                                                                                                                                                                                                                                                                                                                                                                                                                         |
| Keywords:                       | Musculoskeletal trauma, Precision rehabilitation, Pain mechanisms                                                                                                                                                                                                                                                                                                                                                                                                                                                                                                                                                                                                                                                                                                                                                                          |
|                                 |                                                                                                                                                                                                                                                                                                                                                                                                                                                                                                                                                                                                                                                                                                                                                                                                                                            |

SCHOLARONE™  
Manuscripts

**TITLE PAGE****DEVELOPMENT OF A SCREENING TOOL TO PREDICT THE RISK OF  
CHRONIC PAIN AND DISABILITY FOLLOWING MUSCULOSKELETAL  
TRAUMA: PROTOCOL FOR A PROSPECTIVE OBSERVATIONAL STUDY**

Rushton A<sup>1,2</sup>, Evans DW<sup>1,2</sup>, Middlebrook N<sup>1,2</sup>, Heneghan N<sup>1</sup>, Small C<sup>2</sup>, Lord J<sup>2</sup>, Patel JM<sup>2</sup>,  
Falla D<sup>1,2</sup>.

**Affiliations**

<sup>1</sup> Centre of Precision Rehabilitation for Spinal Pain  
School of Sport, Exercise and Rehabilitation Sciences  
College of Life and Environmental Sciences  
University of Birmingham  
Edgbaston  
Birmingham  
B15 2TT  
United Kingdom

<sup>2</sup> NIHR Surgical Reconstruction & Microbiology Research Centre  
University of Birmingham  
Edgbaston  
Birmingham  
B15 2TT  
United Kingdom

**Correspondence:**

Professor Deborah Falla  
Centre of Precision Rehabilitation for Spinal Pain  
School of Sport, Exercise and Rehabilitation Sciences,  
College of Life and Environmental Sciences,  
University of Birmingham,  
Birmingham, B15 2TT, UK.  
Tel: +44 121 415 4220  
Email: d.falla@bham.ac.uk

## 1 **ABSTRACT**

### 2 **Introduction**

3 Pain is an expected and appropriate experience following traumatic musculoskeletal injury.  
4 By contrast, chronic pain and disability are unhelpful yet common sequelae of trauma-related  
5 injuries. Presently, the mechanisms that underlie the transition from acute to chronic  
6 disabling post-traumatic pain are not fully understood. Such knowledge would facilitate the  
7 development and implementation of precision rehabilitation approaches that match  
8 interventions to projected risk of recovery, with the aim of preventing poor long-term  
9 outcomes. The aim of this study is to identify a set of predictive factors to identify patients at  
10 risk of developing ongoing post-traumatic pain and disability following acute  
11 musculoskeletal trauma. To achieve this, we will use a unique and comprehensive  
12 combination of patient-reported outcome measures, psychophysical testing and biomarkers.

### 14 **Methods/analysis**

15 A prospective observational study will recruit two temporally staggered cohorts [n=250 each  
16 cohort; at least 10 cases per candidate predictor] of consecutive acute musculoskeletal trauma  
17 patients aged  $\geq 16$  years, who are emergency admissions into a Major Trauma Centre in the  
18 United Kingdom, with an episode inception defined as the traumatic event. The first cohort  
19 will identify candidate predictors to develop a screening tool to predict development of  
20 chronic and disabling pain, and the second will allow evaluation of the predictive  
21 performance of the tool [validation]. The outcome being predicted is an individual's absolute  
22 risk of poor outcome measured at 6 months follow-up using the Chronic Pain Grade Scale  
23 [poor outcome  $\geq$  Grade II]. Candidate predictors encompass the four primary mechanisms of  
24 pain: *nociceptive* [e.g. injury location], *neuropathic* [e.g. painDETECT], *inflammatory*  
25 [biomarkers], and *central hypersensitivity* [e.g. quantitative sensory testing]. Concurrently,

1 patient-reported outcome measures will assess general health and psychosocial factors [e.g.  
2 pain self-efficacy]. Risk of poor outcome will be calculated using multiple variable  
3 regression analysis.

## 4

### 5 **Ethics and dissemination**

6  
7 NHS Research Ethics Committee and institutional R&D approval are in progress.

### 8

#### 9 Keywords

10 Keywords: Pain mechanisms, Prediction, Precision rehabilitation, Musculoskeletal trauma

11  
12 Funding: NIHR SRMRC

#### 13

#### 14 Word count

15 2412 [excluding tables and references]

## STRENGTHS AND LIMITATIONS OF THIS STUDY

- A comprehensive array of candidate predictive factors will allow for the prediction of chronic and disabling pain following trauma
- These predictive factors will enable the development and validation of a predictive tool to predict good and poor outcome at 6 months post-injury
- The prospective design of the study enables control of unwarranted influences, and enables a stronger case for inferring causal relationships
- Identifying predictive factors related to poor outcome of pain and disability outcome will facilitate targeting of effective interventions
- Other candidate predictors may have been useful to include [e.g. vibration thresholds], but consideration of burden to participants of testing and sample size considerations necessitated prioritisation of candidate predictive factors.

## INTRODUCTION

Pain is an expected and appropriate experience that usually follows traumatic injury.<sup>1</sup> By contrast, chronic pain and disability are unhelpful but common sequelae of trauma-related injuries.<sup>2</sup> Gaining an understanding of why some people develop chronic and disabling post-traumatic pain is therefore a priority for individual patients, the military and society at large. Notwithstanding, the mechanisms that underlie the transition from acute to chronic disabling post-traumatic pain are not fully understood. Such knowledge would facilitate the development and implementation of a clinical pathway of care that matches interventions to projected risk of poor recovery, with the aim of preventing poor long-term outcomes. This project stems from advances in knowledge relating to the assessment and management of pain<sup>3</sup> and the quantification of potential predictive factors to inform personalised rehabilitation; identifying which patients to target with rehabilitation and when and how to target them.

Few studies have specifically explored predictive factors for recovery, whether poor or good, following physical trauma. Of those that have, psychosocial variables such as anxiety, depression and post-traumatic stress, have so far been identified as the strongest predictors of outcome.<sup>4-7</sup> However, only a limited number of variables have hitherto been evaluated as potential predictive factors. Indeed, current opinion regarding pain mechanisms<sup>8</sup> suggests that the development of chronic pain and disability cannot be entirely attributable to psychosocial factors. This is consistent with research in primary care that has identified predictive factors for poor outcome across a range of musculoskeletal pain conditions<sup>9</sup>, which include: widespread pain, high functional disability, high pain intensity, long pain duration,

1  
2  
3 high depression/anxiety, presence of previous pain episodes, movement restriction, and poor  
4 coping strategies. Moreover, developments in the mechanistic understanding of pain<sup>10-12</sup>  
5 suggest that other measures [e.g. indicators of central sensitisation, inflammatory activity]  
6  
7 may have potential predictive utility, especially in an acute trauma population.  
8  
9  
10

### 11 12 13 **Aims of study**

14  
15  
16  
17  
18 Using a unique combination of: 1) general patient characteristics including premorbid  
19 neuropsychological status, 2) quality of life and physical functioning, 3) psychosocial  
20 features, 4) injury characteristics, 5) pain characteristics, 6) quantitative sensory testing, and  
21  
22 7) biomarkers; we aim to find a set of predictive factors to identify patients at risk of  
23  
24 developing ongoing post-traumatic pain and disability following acute musculoskeletal  
25  
26 trauma. This will subsequently inform the feasibility of developing and evaluating a new  
27  
28 clinical care pathway of precision rehabilitation that matches interventions to the predicted  
29  
30 risk of poor recovery.  
31  
32  
33  
34  
35  
36

### 37 **Objectives**

- 38  
39  
40  
41 1) Identify predictive factors for poor outcome [chronic pain and disability at 6-months post-  
42 injury] following acute musculoskeletal trauma.  
43  
44 2) Develop a predictive model to inform a screening tool to identify the predicted risk of poor  
45 recovery [transition from acute post-traumatic pain to chronic pain and disability].  
46  
47 3) Estimate the predictive performance of the screening tool through validation of the model  
48  
49  
50  
51  
52 in a separate data set.  
53  
54  
55  
56  
57  
58  
59  
60

1  
2  
3 4) Document the clinical course of symptoms at 3 and 12 months following acute  
4  
5 musculoskeletal trauma.  
6  
7

## 8 9 **METHODS AND ANALYSIS**

### 10 11 12 13 **Source of data**

14  
15  
16  
17  
18 The study will be a prospective, observational study of two temporally staggered  
19 cohorts of trauma patients, who are emergency department admissions into a Major Trauma  
20 Centre in the United Kingdom, with an episode inception defined as the traumatic event  
21 [Figure 1]. The first cohort will facilitate development of the prediction model to inform the  
22 screening tool, and the second will enable validation of the prediction model through  
23 evaluation of the predictive performance of the model and tool.<sup>13 14</sup> There will be an interval  
24 of at least 6 months between recruitment into the two respective cohorts. The prospective  
25 design enables control of unwarranted influences, and enables a stronger case for inferring  
26 causal relationships. The nature of the study necessitates predictive statistical modelling.<sup>15</sup>  
27  
28 This protocol is written in line with the TRIPOD statement,<sup>16</sup> in which recommendations are  
29 given for the reporting of prediction model development and validation.  
30  
31  
32  
33  
34  
35  
36  
37  
38  
39  
40  
41  
42  
43

44 Self-reported and physical assessment predictive data will be collected at baseline  
45 over a period of up to 14 days [or duration of inpatient stay if shorter], which will commence  
46 immediately following recruitment. Biomarker data collection will occur throughout the same  
47 baseline period, but can commence prior to recruitment providing assent is gained from a  
48 legal consultee. The outcome data will be collected at 6-months post-injury [working  
49 definition of chronic pain];<sup>17</sup> ; the point of evaluation of an individual's absolute risk of poor  
50  
51  
52  
53  
54  
55  
56  
57  
58  
59  
60

1  
2  
3 outcome [objectives 1, 2 and 3]. In addition, selected data will be measured at 3 and 12-  
4  
5 months post-injury to explore the clinical course of recovery following injury in the shorter  
6  
7 and longer term [objective 4].  
8  
9  
10  
11  
12  
13  
14  
15  
16  
17  
18  
19  
20  
21  
22  
23  
24  
25  
26  
27  
28  
29  
30  
31  
32  
33  
34  
35  
36  
37  
38  
39  
40  
41  
42  
43  
44  
45  
46  
47  
48  
49  
50  
51  
52  
53  
54  
55  
56  
57  
58  
59  
60

For peer review only

## Figure 1. Study design

[Insert Figure 1 here].

## Participants

Participants will be recruited from the register of a Major Trauma Centre in the United Kingdom for a period of up to 24 months [planned start date January 2018]. All consecutive eligible patients will be approached for recruitment until the sample size is achieved.

### *Eligibility criteria*

Inclusion criteria: Adult patients aged  $\geq 16$  years who are emergency department admissions into the Major Trauma Centre, with their main criteria for admission being acute musculoskeletal trauma within the preceding 14 days, and a capacity to use and understand written and verbal English language and a mental capacity to provide informed consent [e.g. no confusion, delirium, severe cognitive impairment, or severe mental illness, defined by a score of 6 or less on the Abbreviated Mental Test]<sup>20</sup>. The primary reason for including patients with trauma occurring up to 14 days previously is to be inclusive of patients who are critically ill and/or with diminished mental capacity initially following their trauma, and patients requiring surgery as a result of the trauma; representative of the broad trauma population.

1  
2  
3 Exclusion criteria: Exclusions will be made where the patient has an acute intra-  
4 cranial lesion [e.g. bleed] combined with a score of  $\leq 14$  on the Glasgow Coma Scale<sup>18</sup> [a 15-  
5 item measure of consciousness impairment with adequate reliability<sup>19</sup> that is routinely taken  
6 in trauma patients at hospital admission], where there is evident brain or central nervous  
7 system injury or impairment, long-term neuro-cognitive disorders [such as brain tumour,  
8 multiple sclerosis, Alzheimer's and Parkinson's diseases, etc.], comorbid cancer, the presence  
9 of an ongoing rheumatological condition, prolonged use of corticosteroids, or terminal illness  
10 with short life expectancy.  
11  
12  
13  
14  
15  
16  
17  
18  
19  
20  
21

22 Withdrawals: Participants will be informed that they are free to withdraw from the  
23 study at any time, without needing to provide reason. In the event of death within 3 months of  
24 being recruited, participants will be automatically withdrawn from the study and the primary  
25 prognostic analysis. Baseline data of all withdrawn participants will be kept and compared to  
26 those of retained participants to assess for any differences.  
27  
28  
29  
30  
31  
32  
33  
34

### 35 **Recruitment**

36  
37  
38  
39 Based on feasibility data [site data from the Trauma Audit and Research Network], it  
40 is estimated that at least 1,000 eligible trauma patients will be approachable for recruitment  
41 over a 24-month period, and that 50% would be expected to consent to participation. A  
42 dedicated team of research nurses will be available to recruit patients 7 days per week [from  
43 0700 to 1930].  
44  
45  
46  
47  
48  
49  
50  
51

52 Because of impairments resulting from their injuries, some otherwise eligible patients  
53 will lack the mental capacity to provide informed consent when first approached to enrol in  
54  
55  
56  
57  
58  
59  
60

1  
2  
3 the study. Recruitment into the study will therefore be undertaken under the guidance and  
4  
5 provision of the [UK] Mental Capacity Act 2005 for research in emergency situations. If the  
6  
7 patient lacks sufficient capacity to consent, written assent for study participation will be  
8  
9 sought from a legal consultee to begin biomarker data collection [blood samples], with  
10  
11 informed consent for full recruitment [and subsequent data collection] being sought from the  
12  
13 patient only if, and when, they regain sufficient capacity to provide this. If the patient does  
14  
15 not regain capacity to provide consent within 14 days of their trauma, they will not be  
16  
17 recruited into the study, biomarker data collection will cease, and any blood samples already  
18  
19 collected will be destroyed before analysis.  
20  
21  
22  
23

24  
25 Once informed consent is gained and the participant recruited, following a minimum  
26  
27 1 hour lead time after the informed consent process [to reduce patient burden], members of  
28  
29 the research team will visit the patient at their bedside to collect baseline self-reported data  
30  
31 via questionnaires [Table 1]. On the next available working day following completion of the  
32  
33 questionnaires [again, to reduce patient burden], members of the study team will return to the  
34  
35 patient to conduct the first physical [quantitative sensory testing] assessment. At each visit, if  
36  
37 deemed necessary the capacity of the participant will be checked using an Abbreviated  
38  
39 Mental Test<sup>20</sup> [a score of 6 or lower is indicative of reduced capacity], and asked if they are  
40  
41 happy to proceed with data collection.  
42  
43  
44  
45

## 46 **Outcome**

47  
48  
49

50  
51 The outcome for the prediction model is an individual's absolute risk of poor outcome  
52  
53 [chronic pain and disability] at 6 months post-injury. Outcome will be measured using the  
54  
55 Chronic Pain Grade Scale [CPGS],<sup>21</sup> which combines pain intensity and pain-related  
56  
57  
58  
59  
60

1  
2  
3 disability over the preceding 6-months into a single measure of pain *severity*. The CPGS has  
4  
5 previously been used to assess the severity of body-wide chronic pain in general population,<sup>22</sup>  
6  
7 primary care<sup>23</sup> and post-trauma<sup>24</sup> populations. Each item of the CPGS relates to at least one of  
8  
9 the three categories of the International Classification of Functioning, Disability and Health  
10  
11 [ICF]<sup>25</sup>: impairment, activity limitations and restricted participation. Furthermore, all ICF  
12  
13 categories are encompassed by the CPGS.<sup>26</sup> The CPGS is a unidimensional scale, with good  
14  
15 internal consistency across different pain populations; Cronbach's alpha of 0.84 to 0.91 in  
16  
17 back pain, 0.79 for headache, and 0.84 for temporomandibular pain.<sup>21 27</sup> With regards to  
18  
19 construct validity, cross-sectional and longitudinal studies of general practice patients have  
20  
21 shown high scores on the CPGS, indicating greater chronic pain, to be associated with higher  
22  
23 rates of unemployment, greater pain impact scale scores, greater use of opioid analgesics and  
24  
25 physician visits, depressed mood, and lower self-rated health status.<sup>21 27 28</sup> For convergent  
26  
27 validity, the CPGS has been found to have good correlation with equivalent dimensions of  
28  
29 the SF-36.<sup>27 28</sup> In terms of responsiveness, changes in score over time in patients with chronic  
30  
31 musculoskeletal pain correlated significantly with changes in SF-36 scores.<sup>29</sup> The CPGS has  
32  
33 also been shown to have good test-retest reliability in primary care patients with back pain  
34  
35 [weighted kappa 0.81, 95% CI 0.65, 0.98].<sup>27</sup>

36  
37  
38  
39 Although pain persistence is not used in assigning pain grade, a measure of pain days  
40  
41 in the prior 6-months is included in the CPGS.<sup>30</sup> The responses on the remaining 7-items are  
42  
43 used for computing scores for the 3 subscales of the CPGS:<sup>21</sup> characteristic pain intensity,  
44  
45 disability score, and disability points. The characteristic pain intensity score [range: 0-100] is  
46  
47 obtained by calculating the mean of 3 pain intensity measurements: 'at the present time', the  
48  
49 'worst pain' in the preceding 6 months, and the 'average' pain over the preceding 6 months.  
50  
51 The disability score [range: 0-100] is obtained through the mean ratings of how much the  
52  
53 pain has interfered in performing activities of daily living, recreational, social and family  
54  
55  
56  
57  
58  
59  
60

activities, and work [including housework] activities in the last 6-months. The disability points are scored 0-3 and are derived from a combination of ranked categories of the number of disability days [the number of days that the respondent was away from usual activities in the preceding 6 months due to pain] and disability score. Based on these scores, the participant's chronic pain and disability status can then be classified into one of the 5 ordinal categories of chronic pain severity:<sup>21</sup> no pain [Grade 0], low disability and low intensity pain [Grade I], low disability and high intensity pain [Grade II], high disability and moderately limiting intensity pain [Grade III], and high disability and severely limiting intensity pain [Grade IV]. As in previous studies, poor outcome will be defined as Grade  $\geq$ II.<sup>23 31-34</sup>

### Candidate predictors

Candidate predictors have been selected that are: [1] reliable and valid measures of their domain, and [2] have a theoretical association with the development of chronic pain. Both modifiable and non-modifiable candidate predictors are included. Candidate predictors are summarised in Table 1, with further detail in Supplementary file S1. Table 1 also details important data that will be measured at 3, 6 and 12-months post-injury to explore the clinical course of recovery following injury in the shorter and longer term. All data collection will be standardised through protocols and clinical report forms.

**Table 1: Summary of data collection at different assessment points**

| Domain / Candidate predictor                                                         | Measure / data item        | Baseline<br><i>Commencing<br/><math>\leq</math>14 days<br/>post-trauma</i> | 3 months<br><i>Clinical<br/>course</i> | 6 months<br><i>Outcome<br/>assessment<br/>point /<br/>clinical<br/>course</i> | 12 months<br><i>Clinical<br/>course</i> |
|--------------------------------------------------------------------------------------|----------------------------|----------------------------------------------------------------------------|----------------------------------------|-------------------------------------------------------------------------------|-----------------------------------------|
| <b>General patient characteristics including premorbid neuropsychological status</b> |                            |                                                                            |                                        |                                                                               |                                         |
| Age                                                                                  | In years                   | √                                                                          |                                        |                                                                               |                                         |
| Gender                                                                               | Female / male / other      | √                                                                          |                                        |                                                                               |                                         |
| Body Mass Index                                                                      | Calculated from height and | √                                                                          |                                        |                                                                               |                                         |

|                                                                 |                                                                                                        |   |   |   |   |
|-----------------------------------------------------------------|--------------------------------------------------------------------------------------------------------|---|---|---|---|
| [BMI]                                                           | weight measurements                                                                                    |   |   |   |   |
| Education                                                       | Highest educational level attained                                                                     | √ |   |   |   |
| Employment status                                               | Full-time/ part-time / not working / retired / student<br>Employed / self-employed                     | √ | √ | √ | √ |
| Circumstance of trauma                                          | Military / civilian                                                                                    | √ |   |   |   |
| Previous history of musculoskeletal pain and injury             | Patient history data from patient recollection and medical records                                     | √ |   |   |   |
| Comorbidity of other health problems                            | Patient history data from patient recollection and medical records                                     | √ |   |   |   |
| Premorbid physical health                                       | Patient history data from patient recollection and medical records                                     | √ |   |   |   |
| Premorbid psychological health                                  | Patient history data from patient recollection and medical records                                     | √ |   |   |   |
| Number of days in hospital                                      | Intensive care / ward / total                                                                          | √ |   |   |   |
| <b>Quality of life and physical functioning</b>                 |                                                                                                        |   |   |   |   |
| General health                                                  | 36-item Short Form Health Survey, version 2 [SF-36v2] <sup>35</sup>                                    | √ | √ | √ | √ |
| Health-related quality of life                                  | EuroQol EQ-5D-5L <sup>36</sup>                                                                         | √ | √ | √ | √ |
| Self-care and mobility during activities of daily living        | Barthel Index of Activities of Daily Living, <sup>37</sup> collected from hospital data                | √ |   |   |   |
| Sleep quality                                                   | Subjective Health Complaints Inventory                                                                 | √ | √ | √ | √ |
| Brain/CNS impairment                                            | Glasgow Coma Scale <sup>18</sup>                                                                       | √ |   |   |   |
| <b>Psychosocial features</b>                                    |                                                                                                        |   |   |   |   |
| Anxiety and depression                                          | Hospital Anxiety and Depression Scales [HADS] <sup>38</sup>                                            | √ | √ | √ | √ |
| Coping strategies applied during a painful experience           | Coping Strategies Questionnaire-24 [CSQ-24] <sup>39</sup>                                              | √ | √ | √ | √ |
| Fear of movement or fear of injury or re-injury during movement | Tampa Scale of Kinesiophobia, 11-item [TSK-11] <sup>40</sup>                                           | √ | √ | √ | √ |
| Confidence in ability to perform activities despite pain        | Pain Self-Efficacy Questionnaire <sup>41</sup>                                                         | √ | √ | √ | √ |
| Subjective post-traumatic distress                              | Impact of Event Scale revised [IES-R] <sup>42</sup>                                                    | √ | √ | √ | √ |
| <b>Injury characteristics</b>                                   |                                                                                                        |   |   |   |   |
| Time of injury/incident                                         | Hospital record data                                                                                   | √ |   |   |   |
| Injury location                                                 | Adapted pain drawings, based on hospital record data                                                   | √ |   |   |   |
| Tissues damaged                                                 | Based on imaging data and hospital records<br>Fractures<br>Penetrating / non-penetrating injury / both | √ |   |   |   |
| Surgery required                                                | Location and post-injury timing of surgery, based on hospital                                          | √ |   |   |   |

|                                                  |                                                                                                                                                                   |                |   |   |   |
|--------------------------------------------------|-------------------------------------------------------------------------------------------------------------------------------------------------------------------|----------------|---|---|---|
|                                                  | record data                                                                                                                                                       |                |   |   |   |
| Assisted mechanical ventilation required         | Yes / no / duration                                                                                                                                               | √              |   |   |   |
| Severity of injury                               | Injury Severity Scale <sup>43</sup>                                                                                                                               | √              |   |   |   |
| <b>Pain characteristics</b>                      |                                                                                                                                                                   |                |   |   |   |
| Chronic pain severity                            | Chronic Pain Grade Scale <sup>21</sup>                                                                                                                            |                |   | √ | √ |
| Pain intensity                                   | 11-point [0-10] Numerical Rating Scale, relating to current pain, from 'no pain' to 'pain as bad as could be' [collected as part of the Chronic Pain Grade Scale] | √ <sup>1</sup> | √ | √ | √ |
| Pain medication intake [type, dosage and timing] | Medication Quantification Scale, <sup>44-46</sup> based on hospital record data                                                                                   | √ <sup>1</sup> |   |   |   |
| Pain location                                    | Pain drawing                                                                                                                                                      | √ <sup>1</sup> | √ | √ | √ |
| Pain extent                                      | Electronic pain drawing <sup>47</sup>                                                                                                                             | √ <sup>1</sup> |   |   |   |
| Self-reported features of neuropathic pain       | painDETECT questionnaire <sup>48</sup>                                                                                                                            | √ <sup>1</sup> | √ | √ | √ |
| <b>Quantitative sensory testing</b>              |                                                                                                                                                                   |                |   |   |   |
| Heat pain threshold                              | Evaluation of pain threshold using a heat stimulus                                                                                                                | √ <sup>1</sup> |   |   |   |
| Cold pain threshold                              | Evaluation of pain threshold using a cold stimulus                                                                                                                | √ <sup>1</sup> |   |   |   |
| Pressure pain threshold                          | Evaluation of pain threshold using a pressure stimulus                                                                                                            | √ <sup>1</sup> |   |   |   |
| Temporal summation                               | Evaluation of pain intensity in response to repetitive pressure stimuli                                                                                           | √ <sup>1</sup> |   |   |   |
| <b>Biomarkers</b>                                |                                                                                                                                                                   |                |   |   |   |
| C-reactive protein [CRP]                         | Serum levels of CRP, a broad indicator of inflammation [via blood analysis]                                                                                       | √ <sup>2</sup> |   |   |   |
| Mitochondrial DNA [mtDNA]                        | Serum levels of mitochondrial DNA, an indicator of tissue damage [via blood analysis]                                                                             | √ <sup>2</sup> |   |   |   |

<sup>1</sup> Measurements to be taken repeatedly throughout the baseline period, which will commence immediately following recruitment via informed consent [up to 14 days post-trauma] for a period of up to 14 days [i.e. until a maximum of 28 days post-trauma], whilst the participant is in hospital

<sup>2</sup> Measurements to be taken repeatedly throughout the baseline period, but may be commenced prior to this, subject to assent from a legal consultee

## Data handling

Blood samples will be collected through the clinical and research nurse teams, whilst the participant is in the hospital, and either analysed immediately [C-reactive protein] or securely stored for subsequent analysis [mitochondrial DNA]. Baseline self-reported questionnaires, pain and injury drawings, and physical assessments will be collected by one

1  
2  
3 of three trained assessors from the study team. Inter-rater reliability studies [across 2  
4 assessors] will first be conducted in both healthy and trauma populations to inform definitive  
5 testing protocols. The order of physical assessment data collection will be randomly assigned  
6 [using computerised randomisation software] according to the modality of testing and by site,  
7 to prevent order effects. Follow-up self-reported questionnaires will be posted to participants  
8 at their home addresses; with up to two reminders sent for non-response. All questionnaires  
9 will be formatted so that data can be scanned or entered directly into an electronic database.  
10 Following data entry, data will be checked by a second researcher for completeness and  
11 accuracy. In addition, regular audits of data collection and storage will be performed by an  
12 independent study steering committee. All outcome measure data will be collated into an  
13 anonymised database and stored securely for a period of 10-years at the University of  
14 Birmingham, in line with Research Governance procedures. Participants will receive usual  
15 care, and interventions received will be recorded for descriptive analysis. Data will be  
16 analysed using IBM SPSS Statistics. Participant identifiable information will be stored on an  
17 encrypted electronic database file on physically and electronically secure servers within the  
18 hospital, in line with current United Kingdom data protection legislation, and only accessible  
19 by the Trust Principal Investigator who will not be involved in data analysis.  
20  
21  
22  
23  
24  
25  
26  
27  
28  
29  
30  
31  
32  
33  
34  
35  
36  
37  
38  
39  
40  
41  
42

### 43 **Sample size**

44  
45  
46  
47 In predictive modelling, a larger sample size enables lower bias and variance, and  
48 permits the prospective prediction of new observations.<sup>15</sup> The number of predictors will be  
49 reduced using exploratory factor analysis. This process will ensure that the sample size  
50 provides at least 10 cases per candidate predictor, to adequately power the final regression  
51 analysis.<sup>49 50</sup> Data will be collected for an estimated 300 participants per cohort [n=600 total]  
52  
53  
54  
55  
56  
57  
58  
59  
60

1  
2  
3 to allow for withdrawals [primarily expected deaths within the first 3 months] and losses to  
4 follow-up, so that final data are available for 250 participants per cohort [n=500 total].  
5  
6  
7

### 8 9 **Statistical analysis methods and management of missing data** 10

11  
12  
13 For each cohort, potentially eligible patients, numbers examined for eligibility,  
14 confirmed eligible, recruited into the study, completing follow-up, and analysed will be  
15 reported in a flow diagram. Reasons for non-participation, exclusion, drop-outs and  
16 withdrawal [e.g. death] will be reported at each stage. Participant characteristics will be  
17 descriptively presented. For each variable of interest, the number of participants with  
18 missing data will be reported.  
19  
20  
21  
22  
23  
24  
25  
26  
27

28 For the first cohort to develop the predictive model, an initial exploratory data analysis stage  
29 will summarise the data.<sup>15</sup> Correlations between candidate prognostic factors will be  
30 calculated at baseline. Outcome [CPGS] scores will be dichotomised into good and poor  
31 categories as described previously. Data reduction will use exploratory factor analysis to  
32 assess factor loading of candidate predictors [summary scores] on poor outcome at 6 months.  
33 This will enable the number of candidate predictors entered into the final model to be reduced  
34 to 25, which can be supported by the cohort sample of 250. This process reduces the risk of  
35 over-fitting the model and the risk of selecting the wrong variables due to correlation between  
36 predictor variables [multicollinearity].<sup>51</sup>  
37  
38  
39  
40  
41  
42  
43  
44  
45  
46  
47  
48  
49  
50

51 Statistical modelling for prediction has been planned *a priori*. To explore the  
52 influence of each prognostic factor on poor outcome at 6 months, a logistic multivariable  
53 regression model will be fitted to the dichotomised outcome scores to calculate low and high  
54  
55  
56  
57  
58  
59  
60

1  
2  
3 risk of poor outcome. Odds ratios for each candidate prognostic factor will be reported,  
4  
5 adjusted for other factors and account for clustering [e.g. level of injury severity]. If  
6  
7 necessary, multiple imputation<sup>52</sup> will be used to deal with missing outcome data. The  
8  
9 characteristics of those patients with and without 6-month data will also be compared, to  
10  
11 inform whether patients with no 6-month data were missing at random. Reduced  
12  
13 multivariable analyses will be considered if necessary [e.g. removing one of two candidate  
14  
15 prognostic factors that are highly correlated at baseline], to examine the robustness of the  
16  
17 conclusions.  
18  
19  
20  
21

### 22 **Risk groups and development of the prognostic screening tool**

23  
24  
25

26  
27 The prognostic model will be used to develop a risk stratification tool to inform an  
28  
29 individual's absolute risk of poor outcome. The stratification tool will inform clinical  
30  
31 decision-making for precision rehabilitation. Items will be selected for the model if they are  
32  
33 statistically significantly [ $p < 0.05$ ] associated with poor outcome in the logistic regression  
34  
35 analysis, and those deemed clinically important to retain using expert opinion [regardless of  
36  
37 statistical significance, study steering group] to improve face validity for clinicians and avoid  
38  
39 over-fitting of the model.<sup>51</sup> The regression model with included prognostic factors will be  
40  
41 fitted to the data from the first of the two cohorts to obtain a final set of parameter estimates  
42  
43 [i.e. alpha and beta terms], which will be used to form the model. An important requirement  
44  
45 of the stratification tool is that it should be brief to facilitate use in clinical practice. Thus, we  
46  
47 will look to simplify the model where possible to facilitate its use, but without important  
48  
49 reduction in its prognostic ability in terms of calibration and discrimination. For example, if  
50  
51 multi-item questionnaire scores are included in the model, then we will evaluate whether just  
52  
53  
54  
55  
56  
57  
58  
59  
60

1  
2  
3 one of the questionnaire items is sufficient. Ideally, this process will result in a full and  
4  
5 simplified model.  
6  
7  
8

### 9 **Development versus validation**

10  
11  
12  
13 For validation of the model, data from the second of the two cohorts will be compared  
14  
15 to that of the first to enable analysis of the distribution of important variables; inclusive of  
16  
17 demographic, predictor and outcome variables. The predictive performance of the screening  
18  
19 tool [discrimination, calibration, and goodness of fit] will be assessed using data from the  
20  
21 second cohort. Data in both cohorts will be consistent in terms of setting, eligibility criteria,  
22  
23 outcome, and predictors.  
24  
25  
26  
27

### 28 **DISCUSSION**

29  
30  
31  
32  
33 There is an urgent need for a robust prognostic study to predict the transition from  
34  
35 acute to chronic pain in a musculoskeletal trauma population. Using such a comprehensive  
36  
37 array of outcome measures will allow the development and validation of a prognostic tool to  
38  
39 predict development of chronic and disabling pain, and begin the process of identifying  
40  
41 appropriate and precision interventions.  
42  
43  
44  
45

46  
47 The candidate predictors used in this study have been chosen to be as comprehensive  
48  
49 as possible, based on current knowledge of pain science. Other candidate predictors were  
50  
51 considered [e.g. microRNA biomarkers], but their mechanistic functions and temporal  
52  
53 progression are not yet sufficiently clear to justify the expense of their inclusion. The  
54  
55 combination of patient reported outcome measures, psychophysical testing and biomarkers  
56  
57  
58  
59

1  
2  
3 that are included are designed to act as surrogates for the four primary mechanisms of pain: <sup>53</sup>  
4  
5 <sup>8</sup> *nociceptive* [injury location, severity and characteristics], *neuropathic* [painDETECT tool  
6  
7 and pain extent, *inflammatory* [biomarkers], and *central hypersensitivity* [quantitative sensory  
8  
9 testing, painDETECT and pain location and extent]. In addition, other patient-reported  
10  
11 outcome measures [e.g. pain intensity, post-traumatic stress, anxiety and depression, coping,  
12  
13 and pain self-efficacy] are included as the domains that they measure have been shown to  
14  
15 influence prognosis for long-term outcomes in populations with pain in a range of locations.<sup>9</sup>  
16  
17  
18 23 24

22  
23  
24  
25  
26  
27  
28  
29  
30  
31  
32  
33  
34  
35  
36  
37  
38  
39  
40  
41  
42  
43  
44  
45  
46  
47  
48  
49  
50  
51  
52  
53  
54  
55  
56  
57  
58  
59  
60

Rehabilitation is widely regarded as an important component of post-trauma  
healthcare;<sup>54</sup> however, the current position of equipoise means that precision rehabilitation  
has not yet been identified. Understanding mechanisms that underlie the transition from acute  
to chronic pain is essential to moving beyond this position. Identifying prognostic factors  
related to poor outcome of pain and disability outcome will facilitate targeting of effective  
interventions. This will inform rehabilitation decision making, and facilitate improvements in  
clinical and cost effectiveness of rehabilitation interventions.

Limited research has identified criteria for quality in a prognostic model, but authors  
have identified potential quality issues to ensure methodological rigour.<sup>55</sup> These issues are  
summarised in Table 2 and incorporated into the study design to ensure low risk of bias in  
development and validation of the predictive model.

**Table 2: Methodological decisions to improve study quality**

| Criteria <sup>55</sup> | Methodological decisions to improve quality                                                                                             |
|------------------------|-----------------------------------------------------------------------------------------------------------------------------------------|
| <b>Study design</b>    |                                                                                                                                         |
| Inception cohort       | <ul style="list-style-type: none"> <li>• Clear description of population</li> <li>• Clear description of the participants at</li> </ul> |

|                                                              |                                                                                                                                                                                                                                                |
|--------------------------------------------------------------|------------------------------------------------------------------------------------------------------------------------------------------------------------------------------------------------------------------------------------------------|
|                                                              | baseline                                                                                                                                                                                                                                       |
| Source population                                            | <ul style="list-style-type: none"> <li>• Clear description of population</li> <li>• Clear description of sampling frame and recruitment [method and timing]</li> </ul>                                                                         |
| Inclusion and exclusion criteria                             | <ul style="list-style-type: none"> <li>• Clarity of eligibility criteria</li> </ul>                                                                                                                                                            |
| Prospective design                                           | <ul style="list-style-type: none"> <li>• Clarity of study design</li> </ul>                                                                                                                                                                    |
| <b>Study attrition</b>                                       |                                                                                                                                                                                                                                                |
| Number of drop-outs                                          | <ul style="list-style-type: none"> <li>• Adequate participation rate</li> <li>• Clear description of attempts to collect information on participants who dropped out</li> <li>• Reporting numbers and reasons for loss to follow-up</li> </ul> |
| Information provided on method of management of missing data | <ul style="list-style-type: none"> <li>• Appropriate methods of imputation of missing data</li> </ul>                                                                                                                                          |
| <b>Predictive factors</b>                                    |                                                                                                                                                                                                                                                |
| All predictive factors described used to develop the model   | <ul style="list-style-type: none"> <li>• Clear definition of predictive factors</li> <li>• An adequate proportion of participants has complete data for the predictive factor</li> </ul>                                                       |
| Standardised or valid measurements                           | <ul style="list-style-type: none"> <li>• The measurement of the predictive factor is reliable and valid</li> <li>• The measurement of the predictive factor is the same for all participants</li> </ul>                                        |
| Linearity assumption studied                                 | <ul style="list-style-type: none"> <li>• Linearity of data will be reported</li> </ul>                                                                                                                                                         |
| No dichotomization of prognostic variables                   | <ul style="list-style-type: none"> <li>• Continuous variables will be reported where possible</li> </ul>                                                                                                                                       |
| Data presentation all predictive factors                     | <ul style="list-style-type: none"> <li>• Complete data will be presented</li> </ul>                                                                                                                                                            |
| <b>Outcome measures</b>                                      |                                                                                                                                                                                                                                                |
| Description of outcome measures                              | <ul style="list-style-type: none"> <li>• The outcome is clearly defined</li> </ul>                                                                                                                                                             |
| Standardised or valid measurements                           | <ul style="list-style-type: none"> <li>• The measurement of the outcome is reliable and valid</li> <li>• The measurement of the outcome is the same for all participants</li> </ul>                                                            |
| Data presentation of most important outcome measures         | <ul style="list-style-type: none"> <li>• Complete data will be presented</li> </ul>                                                                                                                                                            |
| <b>Analysis</b>                                              |                                                                                                                                                                                                                                                |
| Presentation of univariate crude estimates                   | <ul style="list-style-type: none"> <li>• An appropriate strategy for model building is described</li> <li>• An adequate statistical model described</li> </ul>                                                                                 |
| Sufficient numbers of subjects per variable                  | <ul style="list-style-type: none"> <li>• Adequate data will be presented</li> </ul>                                                                                                                                                            |
| Selection method of variables explained                      | <ul style="list-style-type: none"> <li>• Sufficient data will be presented to enable assessment of the adequacy of the analytic strategy</li> <li>• All results will be reported</li> </ul>                                                    |
| Presentation of multivariate estimates                       | <ul style="list-style-type: none"> <li>• An appropriate strategy for model building is described</li> <li>• An adequate statistical model described</li> </ul>                                                                                 |
| <b>Clinical performance / validity</b>                       |                                                                                                                                                                                                                                                |
| Clinical performance                                         | <ul style="list-style-type: none"> <li>• Clinical performance of the model will be reported</li> </ul>                                                                                                                                         |

|                     |                                        |
|---------------------|----------------------------------------|
| Internal validation | • Internal validation will be reported |
| External validation | Not a focus of this study              |

## **ETHICS AND DISSEMINATION**

Ethical approval will be obtained from the NHS Research Ethics Committee, and institutional R&D approval will also be obtained.

### **Patient burden and potential distress**

The primary ethical concern is to limit distress on participants. As such, to reduce the patient burden when collecting baseline data, the self-reported questionnaires will be administered by members of the study team shortly following obtaining fully informed consent, and physical assessment outcomes will be measured at least 24 hours later. Patients will be asked to consent to not only providing new data for the study, but also for the study team to access information that will have been routinely collected by the hospital staff since the time of admission [e.g. nature and circumstances of injury, previous medical history, medication details, blood test results]. This will be fully explained to patients and explicitly detailed in the participant information sheet.

### **Mental capacity**

Because of the nature of their injuries, the patient's mental capacity will be assessed on admission into hospital and thereafter by clinical staff and/or research nurses. The mental capacity of eligible patients at the time of being approached for recruitment will therefore fall

1  
2  
3 into one of two groups: either they possess or are lacking mental capacity [in accordance with  
4 the Mental Capacity Act 2005] to provide informed consent to voluntarily participate in the  
5 study.  
6  
7  
8  
9

10  
11 For patients possessing mental capacity to provide consent, a research nurse or  
12 member of the research team will ask if they are interested in participating in the study. If  
13 they are interested, a copy of the participant information sheet will be provided [and if  
14 necessary read to them] to give them an outline of the study. Following an opportunity to  
15 seek additional information and ask questions, the patient will be asked if they wish to  
16 provide their written informed consent to participate in the study, at which point a consent  
17 form will need to be signed.  
18  
19  
20  
21  
22  
23  
24  
25  
26  
27

28  
29 On admission to the hospital, an otherwise eligible patient may lack the mental  
30 capacity to decide whether to provide consent to participate in a research study [e.g. due to  
31 the severity of their injuries, because they are arriving intubated and ventilated, or as a side-  
32 effect of medication for their injuries]. They may or may not regain this capacity during their  
33 stay in the hospital. Due to our wish to begin measuring biomarkers as early as possible  
34 following the onset of trauma, for some otherwise eligible patients it would be necessary to  
35 take blood samples before the patient has regained the capacity to provide informed consent.  
36 Using the convention of previous studies in trauma populations,<sup>56</sup> recruitment into the study  
37 will be undertaken under the provision and guidance of the Mental Capacity Act 2005 for  
38 research in emergency situations, and in accordance with the Declaration of Helsinki. As  
39 such, if a patient does not possess this capacity when first approached for recruitment, the  
40 research team will request a mandate to collect blood samples from a legal consultee. This  
41 mandate can continue until the patient gains sufficient capacity to make an informed decision  
42  
43  
44  
45  
46  
47  
48  
49  
50  
51  
52  
53  
54  
55  
56  
57  
58  
59  
60

1  
2  
3 as to whether they wish to provide consent or not. We will use this mandate up to 14 days  
4  
5 from the date of the trauma. If the patient does not regain capacity within 14 days following  
6  
7 the trauma, or if informed consent is not provided by the patient once capacity to do so is  
8  
9 regained, any samples collected will be destroyed before any non-clinical biomarker analysis  
10  
11 [i.e. mitochondrial DNA] is performed. Furthermore, only once informed consent has been  
12  
13 gained from the patient would the research team proceed to collect any self-reported  
14  
15 questionnaire or physical assessment data. The legal consultee can either be a 'personal  
16  
17 consultee' e.g. family member, or a 'nominated consultee' e.g. intensive care consultant.  
18  
19 Once a consultee [personal or nominated] has been identified, they will be provided with the  
20  
21 participant information sheet, to inform them about the study. The consultee will be asked if  
22  
23 they feel participating in the study would be something to which the patient would agree or  
24  
25 object to. If, in their opinion, the patient would agree to participating in the study, the  
26  
27 consultee will be asked to sign a declaration form, and the research team can begin the  
28  
29 schedule of blood sample collections. If, at any time prior to the patient regaining capacity,  
30  
31 the consultee decides to withdraw assent, then no further samples will be collected until the  
32  
33 patient can be approached for formal recruitment [if appropriate].  
34  
35  
36  
37  
38  
39

#### 40 Other ethical issues

41  
42  
43  
44 Participants will be informed that they are free to withdraw from the study at any  
45  
46 time, without needing to provide reason. At each data collection visit, the capacity of the  
47  
48 participant will be checked [using an Abbreviated Mental Test, if deemed necessary] and  
49  
50 asked if they are happy to proceed with data collection. Any concerns for a participant by the  
51  
52 study team will be fed back to clinical staff. All blood samples will be collected by hospital  
53  
54 staff and the research nurse team and will be stored, tested and disposed of in accordance  
55  
56  
57  
58  
59  
60

1  
2  
3 with current United Kingdom guidelines and regulations. In the event of death within 3  
4  
5 months of being recruited, participants will be automatically withdrawn from the study and  
6  
7 the primary prognostic analysis. Baseline characteristics of withdrawn participants will be  
8  
9 compared to those of retained participants to assess for any differences.  
10  
11  
12  
13  
14  
15  
16  
17  
18  
19  
20  
21  
22  
23  
24  
25  
26  
27  
28  
29  
30  
31  
32  
33  
34  
35  
36  
37  
38  
39  
40  
41  
42  
43  
44  
45  
46  
47  
48  
49  
50  
51  
52  
53  
54  
55  
56  
57  
58  
59  
60

For peer review only

## REFERENCES

1. Berben SA, Schoonhoven L, Meijs TH, et al. Prevalence and relief of pain in trauma patients in emergency medical services. *Clin J Pain* 2011;27(7):587-92. doi: 10.1097/AJP.0b013e3182169036
2. Williamson OD, Epi GD, Gabbe BJ, et al. Predictors of moderate or severe pain 6 months after orthopaedic injury: a prospective cohort study. *J Orthop Trauma* 2009;23(2):139-44. doi: 10.1097/BOT.0b013e3181962e29
3. Mannion RJ, Woolf CJ. Pain mechanisms and management: a central perspective. *Clin J Pain* 2000;16(3 Suppl):S144-56.
4. Holbrook TL, Anderson JP, Sieber WJ, et al. Outcome after major trauma: discharge and 6-month follow-up results from the Trauma Recovery Project. *J Trauma* 1998;45(2):315-23; discussion 23-4.
5. Holbrook TL, Anderson JP, Sieber WJ, et al. Outcome after major trauma: 12-month and 18-month follow-up results from the Trauma Recovery Project. *J Trauma* 1999;46(5):765-71; discussion 71-3.
6. Harris IA, Young JM, Rae H, et al. Predictors of general health after major trauma. *J Trauma* 2008;64(4):969-74. doi: 10.1097/01.ta.0000245972.83948.1a
7. Ponsford J, Hill B, Karamitsios M, et al. Factors influencing outcome after orthopedic trauma. *J Trauma* 2008;64(4):1001-9. doi: 10.1097/TA.0b013e31809fec16
8. Vardeh D, Mannion RJ, Woolf CJ. Toward a Mechanism-Based Approach to Pain Diagnosis. *J Pain* 2016;17(9 Suppl):T50-69. doi: 10.1016/j.jpain.2016.03.001
9. Artus M, Campbell P, Mallen CD, et al. Generic prognostic factors for musculoskeletal pain in primary care: a systematic review. *BMJ Open* 2017;7(1):e012901. doi: 10.1136/bmjopen-2016-012901
10. Latremoliere A, Woolf CJ. Central sensitization: a generator of pain hypersensitivity by central neural plasticity. *J Pain* 2009;10(9):895-926. doi: 10.1016/j.jpain.2009.06.012
11. Linley JE, Rose K, Ooi L, et al. Understanding inflammatory pain: ion channels contributing to acute and chronic nociception. *Pflugers Arch* 2010;459(5):657-69. doi: 10.1007/s00424-010-0784-6
12. CJ. W. Central sensitization: implications for the diagnosis and treatment of pain. *Pain* 2011;152(3):S2-15.
13. Altman DG, Vergouwe Y, Royston P, et al. Prognosis and prognostic research: validating a prognostic model. *BMJ* 2009;338(338):b605. doi: 10.1136/bmj.b605
14. Moons KG, Kengne AP, Grobbee DE, et al. Risk prediction models: II. External validation, model updating, and impact assessment. *Heart* 2012;98(9):691-8. doi: 10.1136/heartjnl-2011-301247
15. Shmueli G. To explain or to predict? *Statistical Science* 2010;25(3):289-310.
16. Collins GS, Reitsma, J.B., Altman, D.G. and Moons, K.G., . Transparent reporting of a multivariable prediction model for individual prognosis or diagnosis (TRIPOD): the TRIPOD statement. *BMC Medicine* 2015;13(1)
17. Merskey H BN. Classification of chronic pain : descriptions of chronic pain syndromes and definitions of pain terms. USA: IASP Press 1994.
18. Teasdale G, Jennett B. Assessment of coma and impaired consciousness. A practical scale. *Lancet* 1974;2(7872):81-4.
19. Reith FC, Van den Brande R, Synnot A, et al. The reliability of the Glasgow Coma Scale: a systematic review. *Intensive Care Med* 2016;42(1):3-15. doi: 10.1007/s00134-015-4124-3
20. HM H. Evaluation of a mental test score for assessment of mental impairment in the elderly. *Age and Ageing* 1972;1(4):233-8.

- 1
- 2
- 3 21. Von Korff M, Ormel J, Keefe FJ, et al. Grading the severity of chronic pain. *Pain* 1992;50(2):133-
- 4 49.
- 5 22. Parsons S, Breen A, Foster NE, et al. Prevalence and comparative troublesomeness by age of
- 6 musculoskeletal pain in different body locations. *Fam Pract* 2007;24(4):308-16. doi:
- 7 10.1093/fampra/cmm027
- 8 23. Muller S, Thomas E, Dunn KM, et al. A prognostic approach to defining chronic pain across a
- 9 range of musculoskeletal pain sites. *Clin J Pain* 2013;29(5):411-6. doi:
- 10 10.1097/AJP.0b013e318257099e
- 11 24. Rivara FP, Mackenzie EJ, Jurkovich GJ, et al. Prevalence of pain in patients 1 year after major
- 12 trauma. *Arch Surg* 2008;143(3):282-7; discussion 88. doi: 10.1001/archsurg.2007.61
- 13 25. Organization WH. The International Classification of Functioning, Disability and Health (ICF).
- 14 Geneva: WHO 2001.
- 15 26. Dixon D PD, Johnston M. What does the chronic pain grade questionnaire measure? *Pain*
- 16 2007;130:249-53.
- 17 27. Smith BH, Penny KI, Purves AM, et al. The Chronic Pain Grade questionnaire: validation and
- 18 reliability in postal research. *Pain* 1997;71(2):141-7.
- 19 28. Penny KI PA, Smith BH, Chambers WA, Smith WC. Relationship between the chronic pain grade
- 20 and measures of physical, social and psychological well-being. *pain* 1999;79:275-9.
- 21 29. Elliott AM SB, Smith WC, Chambers WA. Changes in chronic pain severity over time: The Chronic
- 22 Pain Grade as a valid measure. *Pain* 2000;88:303.
- 23 30. Von Korff M, Jensen MP, Karoly P. Assessing global pain severity by self-report in clinical and
- 24 health services research. *Spine (Phila Pa 1976)* 2000;25(24):3140-51.
- 25 31. Von Korff M, Miglioretti DL. A prognostic approach to defining chronic pain. *Pain*
- 26 2005;117(3):304-13. doi: 10.1016/j.pain.2005.06.017
- 27 32. Von Korff M, Dunn KM. Chronic pain reconsidered. *Pain* 2008;138(2):267-76. doi:
- 28 10.1016/j.pain.2007.12.010
- 29 33. Dunn KM, Croft PR, Main CJ, et al. A prognostic approach to defining chronic pain: replication in a
- 30 UK primary care low back pain population. *Pain* 2008;135(1-2):48-54. doi:
- 31 10.1016/j.pain.2007.05.001
- 32 34. Thomas E, Dunn KM, Mallen C, et al. A prognostic approach to defining chronic pain: application
- 33 to knee pain in older adults. *Pain* 2008;139(2):389-97. doi: 10.1016/j.pain.2008.05.010
- 34 35. Ware J. SF-36 Health Survey Updated. *Spine* 2000;25(24):3130-39.
- 35 36. Brooks R. EuroQol: the current state of play. *Health Policy* 1996;37(1):53-72.
- 36 37. Mahoney FI, Barthel DW. Functional Evaluation: The Barthel Index. *Md State Med J* 1965;14:61-5.
- 37 38. Zigmond AS, Snaith RP. The hospital anxiety and depression scale. *Acta Psychiatr Scand*
- 38 1983;67(6):361-70.
- 39 39. Harland NJ GK. Development of the coping strategies questionnaire 24, a clinically utilitarian
- 40 version of the coping strategies questionnaire. *Rehabilitation Psychology* 2003;48(4):296-
- 41 300.
- 42 40. Woby SR, Roach NK, Urmston M, et al. Psychometric properties of the TSK-11: a shortened
- 43 version of the Tampa Scale for Kinesiophobia. *Pain* 2005;117(1-2):137-44. doi:
- 44 10.1016/j.pain.2005.05.029
- 45 41. M.K. N. The pain self-efficacy questionnaire: Taking pain into account. *Eur J Pain* 2007;11(2):153-
- 46 63.
- 47 42. Beck JG, Grant DM, Read JP, et al. The impact of event scale-revised: psychometric properties in
- 48 a sample of motor vehicle accident survivors. *J Anxiety Disord* 2008;22(2):187-98. doi:
- 49 10.1016/j.janxdis.2007.02.007
- 50 43. Baker SP, O'Neill B, Haddon W, Jr., et al. The injury severity score: a method for describing
- 51 patients with multiple injuries and evaluating emergency care. *J Trauma* 1974;14(3):187-96.
- 52 44. Masters Steedman S, Middaugh SJ, Kee WG, et al. Chronic-pain medications: equivalence levels
- 53 and method of quantifying usage. *Clin J Pain* 1992;8(3):204-14.
- 54
- 55
- 56
- 57
- 58
- 59
- 60

- 1  
2  
3 45. Harden RN, Weinland SR, Remble TA, et al. Medication Quantification Scale Version III: update in  
4 medication classes and revised detriment weights by survey of American Pain Society  
5 Physicians. *J Pain* 2005;6(6):364-71. doi: 10.1016/j.jpain.2005.01.350  
6  
7 46. Gallizzi M GC, Harden RN, Stanos S, Khan A. Medication Quantification Scale Version III: internal  
8 validation of detriment weights using a chronic pain population. . *Pain Pract* 2008;8(1):1-4.  
9  
10 47. Barbero M, Mores, F., Leoni, D., Gatti, R., Egloff, M., Falla, D. Test-retest reliability of pain extent  
11 and pain location using a novel method for pain drawing analysis. *European Journal of Pain*  
12 2015;19:1129-38.  
13  
14 48. Freynhagen R, Baron R, Gockel U, et al. painDETECT: a new screening questionnaire to identify  
15 neuropathic components in patients with back pain. *Curr Med Res Opin* 2006;22(10):1911-  
16 20. doi: 10.1185/030079906X132488  
17  
18 49. Peduzzi P, Concato J, Kemper E, et al. A simulation study of the number of events per variable in  
19 logistic regression analysis. *J Clin Epidemiol* 1996;49(12):1373-9.  
20  
21 50. Vittinghoff E, McCulloch CE. Relaxing the rule of ten events per variable in logistic and Cox  
22 regression. *Am J Epidemiol* 2007;165(6):710-8. doi: 10.1093/aje/kwk052  
23  
24 51. KL S. Multivariate Regression: The Pitfalls of Automated Variable Selection. *Physical Medicine  
25 and Rehabilitation* 2013;5:791-94.,  
26  
27 52. Sterne JA, White IR, Carlin JB, et al. Multiple imputation for missing data in epidemiological and  
28 clinical research: potential and pitfalls. *BMJ* 2009;338:b2393. doi: 10.1136/bmj.b2393  
29  
30 53. Woolf CJ, Bennett GJ, Doherty M, et al. Towards a mechanism-based classification of pain? *Pain*  
31 1998;77(3):227-9.  
32  
33 54. NICE. Rehabilitation after critical illness in adults Clinical guideline [CG83]. 2009  
34  
35 55. van Oort L, van den Berg T, Koes BW, et al. Preliminary state of development of prediction  
36 models for primary care physical therapy: a systematic review. *J Clin Epidemiol*  
37 2012;65(12):1257-66. doi: 10.1016/j.jclinepi.2012.05.007  
38  
39 56. Hazeldine J, Naumann DN, Toman E, et al. Prehospital immune responses and development of  
40 multiple organ dysfunction syndrome following traumatic injury: A prospective cohort study.  
41 *PLoS Med* 2017;14(7):e1002338. doi: 10.1371/journal.pmed.1002338  
42  
43  
44  
45  
46  
47  
48  
49  
50  
51  
52  
53  
54  
55  
56  
57  
58  
59  
60

### Authors' contributions

DF and AR are the Chief Investigators leading protocol development, analyses and dissemination. DE is the Research Fellow with responsibility for study management. NM is a Doctoral Researcher focused to this study. NH is the lead for Patient and Public Involvement. DF and AR are overseeing data analysis. JP is the Trust Principal Investigator. JP and CS are clinical leads at the NHS Trust. JL is the lead for biomarker evaluation. All authors will contribute to data interpretation, conclusions, and dissemination. AR drafted the initial manuscript with DF. Subsequent drafts were developed with DE. All reviewers have read, contributed to, and agreed the final manuscript. DF is the guarantor.

1  
2  
3 **Funding statement**  
4  
5

6  
7 This work was supported by the National Institute for Health Research [NIHR] to DF and  
8  
9 AR.  
10

11  
12  
13 **Competing interests**  
14

15 There are no competing interests.  
16  
17

18  
19  
20 **Data sharing statement**  
21

22 No additional data are available.  
23  
24  
25  
26  
27  
28  
29  
30  
31  
32  
33  
34  
35  
36  
37  
38  
39  
40  
41  
42  
43  
44  
45  
46  
47  
48  
49  
50  
51  
52  
53  
54  
55  
56  
57  
58  
59  
60

1  
2  
3  
4  
5  
6  
7  
8  
9  
10  
11  
12  
13  
14  
15  
16  
17  
18  
19  
20  
21  
22  
23  
24  
25  
26  
27  
28  
29  
30  
31  
32  
33  
34  
35  
36  
37  
38  
39  
40  
41  
42  
43  
44  
45  
46  
47  
48  
49  
50  
51  
52  
53  
54  
55  
56  
57  
58  
59  
60



Study design

500x521mm (300 x 300 DPI)

## Supplementary file 1. Candidate predictive factors

### *General participant characteristics*

Several participant demographic features will be recorded at baseline, based on available hospital records and patient self-reported recollection, including smoking status, age, gender, height and weight to calculate body mass index [BMI], education [highest attained educational level], employment status [at the time of trauma], circumstance of trauma [military or civilian], previous history of musculoskeletal pain and injury, comorbidity of other current health problems.

### *Quality of life and physical functioning*

#### 36-Item Short Form Health Survey, Version 2.0 [SF-36v2]

The SF-36v2 is a self-reported measure of health-related quality of life, modified from the original SF-36, which was developed as part of the Medical Outcomes Study.<sup>1</sup> The 36-item questionnaire has subscales that assess physical, function, social and psychological wellbeing.<sup>2 3</sup> The scores can be divided into physical and mental component summary scales.<sup>4</sup> The SF-36 has been shown to be valid and has been tested extensively in a trauma population.<sup>5</sup> Ware<sup>6</sup> reports multiple studies showing internal consistency above 0.70, with physical and mental scores exceeding 0.90. Minimal clinically important difference has been reported as 5.5 in a musculoskeletal trauma population.<sup>7</sup> Introduced in 1996, version 2.0 of the SF-36 is comparable to the original, retaining all subscales, with improvements to layout, presentation, response scales, wording and scoring.<sup>6</sup> The 'acute' [1 week recall period] version will be used, since the 4 week recall would not be appropriate for post-injury recall at baseline.

### EuroQol Five Dimension Scale, 5-level [EQ-5D-5L]

Health-related quality of life will be quantified using the EQ-5D-5L through which 243 possible health states are converted to a single index value of range 0 to 1 where 1 is perfect health, and a visual analogue scale range 0–100, representing ‘worst’ to ‘best’ imaginable health state, respectively.<sup>8</sup> The EQ-5D-5L, with each item having 5 possible responses, has improved inter-observer [ICC 2,1 0.57] and test-retest [ICC 2,1 0.69] reliability compared to the previous EQ-5D-3L.<sup>9</sup> In addition, it has less ceiling effects [20.8% reduction] and adequate convergent validity when compared with the WHO-5 [spearman rank 0.38-0.51].<sup>10</sup>

### Barthel Index of Activities of Daily Living

The Barthel Index of Activities of Daily Living is routinely collected by clinical staff at the hospital, and will be used to evaluate self-care and mobility during activities of daily living.<sup>11</sup>

<sup>12</sup> It is a 10-item ordinal scale encompassing a range of mobility physical activity tasks. Each item is related to a specific task and rated with a given number of points. A score of ‘0’ is given for least independence/function on that item and scores above that [1 or 2] are given for increasing independence/function [range: 0-20]. The amount of time and physical assistance required to perform each task are used in determining the assigned value of each item. A higher score is associated with a greater likelihood of being able to live at home with a degree of independence following discharge from hospital. With most measurement testing performed in the stroke population, the Barthel Index has demonstrated excellent internal consistency [0.89-0.90]<sup>13</sup> and is highly responsive in detecting changes<sup>14</sup> with a minimal detectable change of 4.02 and minimally clinically important difference of 1.85.<sup>15</sup> High correlations have been demonstrated with the Functional Independence Measure [FIM], indicating convergent validity of the instrument.<sup>16</sup>

### Subjective Health Complaints Inventory

1  
2  
3 Sleep quality will be assessed using the single-item questions from the sleep domain of the  
4 Subjective Health Complaints Inventory.<sup>17</sup> The Subjective Health Complaints Inventory has  
5 been shown to be a reliable measure of recording subjective health complaints;<sup>17</sup> although no  
6 study has focused on the reliability of using the single item relating to sleep.  
7  
8  
9  
10  
11  
12  
13

### 14 ***Psychosocial features***

#### 15 The Hospital Anxiety and Depression Scales [HADS]

16  
17  
18  
19 The HADS will be used to measure depression and anxiety, and their role in the  
20 manifestation of somatic symptoms.<sup>18</sup> There are 7 items which produce a cumulative score  
21 [range 0–21] for the anxiety [HADS-A] and depression [HADS-D] subscales, with a higher  
22 score indicative of greater anxiety and depression.<sup>19</sup> HADS has been tested in multiple  
23 populations demonstrating adequate to excellent internal consistency of HADS-A [0.68-0.93]  
24 and HADS-D [0.67-0.90].<sup>19</sup> Standard measurement of error in a coronary heart disease  
25 population was identified as 1.37 and 1.44 for anxiety and depression scales respectively, and  
26 minimal detectable change as 3.80 and 3.99 respectively.<sup>20</sup> The HADS has also demonstrated  
27 excellent concurrent validity when compared to various other depression/anxiety scales.<sup>19</sup>  
28  
29  
30  
31  
32  
33  
34  
35  
36  
37  
38  
39  
40  
41  
42  
43  
44

#### 45 Coping Strategies Questionnaire 24 [CSQ-24]

46  
47 The CSQ-24 will be used to provide an indication of coping strategies used by participants  
48 when they are in pain.<sup>21</sup> Developed from items from the earlier, much larger Coping  
49 Strategies Questionnaire,<sup>22</sup> the CSQ-24 is a 23-item scale, composed of 4 subscales:  
50 *catastrophizing* [6 items], *diversion* [6 items], *reinterpreting* [6 items], and *cognitive coping*  
51 [5 items]. Participants are asked to indicate if they have particular thoughts and feelings when  
52 they are experiencing pain. A score on each item is summed to yield an aggregate score for  
53  
54  
55  
56  
57  
58  
59  
60

1  
2  
3 each subscale, with a higher score reflecting greater attribution of that particular coping  
4 strategy. The CSQ-24 has demonstrated good internal consistency in populations with low  
5 back pain patients [Chronbach's alpha for the 4 factors ranged from 0.75 to 0.85] and work-  
6 related pain [0.80 to 0.86]<sup>23</sup> Harland & Georgieff suggested that, since individuals may have  
7 a positive score on more than one subscale, the highest scoring subscale should be deemed  
8 the dominant coping strategy.<sup>21</sup> However, a recent study in a low back pain cohort,<sup>24</sup> in which  
9 individual items from multiple questionnaires were factorised, suggested that *diversion*,  
10 *reinterpreting* and *cognitive coping* clustered together as a single factor, representing coping  
11 cognitions. By contrast, *catastrophizing* clustered with pain-related distress items.  
12  
13  
14  
15  
16  
17  
18  
19  
20  
21  
22  
23  
24  
25

#### 26 Tampa Scale of Kinesiophobia [TSK-11]

27  
28 The TSK-11 will be used to assess fear of movement or fear of injury or re-injury during  
29 movement.<sup>25</sup> It is an 11-item questionnaire, eliminating psychometrically poor items from its  
30 original 17-item version,<sup>26</sup> thus creating a shorter questionnaire with comparable internal  
31 consistency and a 2-factor structure [activity avoidance and harm]. Each of the 11 items is  
32 measured using a 4-point scale using the end points 1 ['totally agree'] and 4 ['totally  
33 disagree'] [scoring range 11–44]. Higher scores indicate more fear-avoidance behaviour. The  
34 TSK-11 has demonstrated acceptable to good internal consistency in acute and chronic  
35 musculoskeletal pain populations.<sup>25 27</sup> Test-retest reliability has been reported as excellent  
36 with a high standardised response mean; with good construct validity in relation to changes in  
37 disability and pain.<sup>25</sup>  
38  
39  
40  
41  
42  
43  
44  
45  
46  
47  
48  
49  
50  
51  
52  
53

#### 54 Pain Self-Efficacy Questionnaire [PSEQ]

55  
56 The patient's confidence in their ability to perform activities despite their pain will be  
57 evaluated using the PSEQ. Developed from the Self-Efficacy Scale,<sup>28</sup> the PSEQ consists of  
58  
59  
60

1  
2  
3 10 physical and psychosocial activity items measuring from 0 ['not at all confident'] to 6  
4  
5 ['completely confident'] thus generating a total score from 0-60.<sup>29</sup> The PSEQ has  
6  
7 demonstrated excellent internal consistency [0.92], internal reliability [0.93], and test-re-test  
8  
9 correlations [r=0.73] and has demonstrated validity when compared to other self-efficacy  
10  
11 measurements.<sup>29</sup> It has been used in several large population studies, for example Campbell  
12  
13 et al.<sup>24</sup>  
14  
15  
16  
17  
18

### 19 Impact of Event Scale Revised [IES-R]

20  
21 The IES-R will be used to measure the subjective stress experienced by the participant  
22  
23 following their traumatic event. The IES-R is a 22-item tool [range: 0-88] that consists of 8  
24  
25 intrusion and 8 avoidance items that are derived from the original IES,<sup>30</sup> with an additional 7-  
26  
27 items assessing hyperarousal.<sup>31</sup> Accordingly, items correspond directly to symptoms of post-  
28  
29 traumatic stress disorder.<sup>31</sup> Respondents are asked to identify a specific stressful life event  
30  
31 and then indicate how much they were distressed or bothered during the past seven days by  
32  
33 each 'difficulty' listed. Each item is rated on a 5-point scale ranging from 0 ['not at all'] to 4  
34  
35 ['extremely']. The IES-R yields a total score ranging 0 to 88 and subscale scores can also be  
36  
37 calculated for the Intrusion, Avoidance, and Hyperarousal sub-scales. The IES-R has  
38  
39 demonstrated good internal consistency for all subscales [intrusion 0.87-0.94, avoidance  
40  
41 0.84-0.97, hyperarousal 0.79-0.91].<sup>32</sup> High correlations have been found between the IES-R  
42  
43 and the original scale, supporting the concurrent validity of both measures.<sup>31</sup>  
44  
45  
46  
47  
48  
49  
50

### 51 *Injury characteristics*

52  
53 Several measures relating to the characteristics of the sustained injury will be taken at  
54  
55 baseline. The time of the injury will be gained from hospital records. The location of the  
56  
57 injury/injuries will be recorded using an adapted version of previously developed pain  
58  
59  
60

1  
2  
3 drawing software, via a tablet computer.<sup>33</sup> Information relating to the tissues damaged from  
4 the injury [e.g. fractures sustained, whether the injury was penetrating, non-penetrating or  
5 both, review of available imaging data] will be gathered from hospital records, where  
6 possible. Whether the participant received surgery following their admission [where, for what  
7 and when], and whether the participant received assisted mechanical ventilation will also be  
8 recorded.  
9

### 10 Injury Severity Scale [ISS]

11  
12 The ISS will be retrospectively calculated for each participant, including those who  
13 withdraw. The ISS is a numerical score with a range 0-75, that is used to describe the overall  
14 severity of injury, and can be used for both multiple and single injuries. The score is  
15 calculated, based on the Abbreviated Injury Scale [AIS] scores.<sup>34 35</sup> Higher ISS scores have  
16 been associated with increased rates of mortality<sup>34 36 37</sup> and length/cost of hospital stay.<sup>38</sup> It is  
17 the recommended tool for summarising injury severity by the Trauma Audit and Research  
18 Network [TARN]. Both TARN and the National Institute for Clinical Excellence<sup>39</sup>  
19 recommend any participant with a score of >8 to be referred for rehabilitation.  
20  
21  
22  
23  
24  
25  
26  
27  
28  
29  
30  
31  
32  
33  
34  
35  
36  
37  
38  
39  
40  
41  
42  
43  
44  
45  
46  
47  
48  
49  
50  
51  
52  
53  
54  
55  
56  
57  
58  
59  
60

### ***Pain characteristics***

#### Pain intensity

Pain intensity will be measured using an 11-point [0-10] Numerical Rating Scale [NRS],  
measuring current pain from 'no pain' to 'pain as bad as could be', from the Chronic Pain  
Grade Scale.<sup>40</sup> We will aim to assess *current* pain intensity at baseline, as frequently as every  
48-hours while the participant is in hospital [depending upon participant accessibility and  
assessor availability], to gain accurate mean and rate-of-change data. At the 6 and 12 month  
assessment points, *current* pain intensity, as well as *average* and *worst* pain intensity related

1  
2  
3 to the preceding 6 months, will be collected as part of the Chronic Pain Grade Scale. NRS  
4  
5 scales are sensitive, reliable and valid instruments for pain intensity measurement,<sup>41-44</sup> and  
6  
7 have been recommended for use in clinical populations in preference to visual analogue  
8  
9 scales or verbal rating scales.<sup>45</sup> A 30% change on a pain NRS score is considered clinically  
10  
11 meaningful.<sup>46-50</sup>  
12  
13

### 14 15 16 17 Pain medication

18  
19 The patient's pain medication [type, dosage and time since trauma] intake will be noted and  
20  
21 the Medication Quantification Score [MQS], which is a reliable and validated score for  
22  
23 quantifying analgesics, will be calculated to obtain a comparable metric for all different  
24  
25 analgesics.<sup>51-53</sup> It enables characterisation of analgesics when many different medications are  
26  
27 involved and doses are irregular. It will be calculated for each non-opioid and opioid, based  
28  
29 on weights assigned by medication class and dosage level [level 1 = sub-therapeutic dosage  
30  
31 and/or on demand, level 2 = lower 50% of the therapeutic dose range, level 3 = upper 50% of  
32  
33 the therapeutic dose range, level 4 = supra-therapeutic dose] using the 1998 detriment  
34  
35 weights.<sup>54</sup> The detriment weights are summed by the dosage level to provide the final score.  
36  
37 These scores will be summed to provide a quantitative index for analgesic usage suitable for  
38  
39 statistical analysis.  
40  
41  
42  
43  
44  
45  
46

### 47 Pain drawing

48  
49 All participants will be requested to complete a pain drawing, indicating the spatial  
50  
51 distribution of their pain, over two body charts; one reporting a frontal view of the body and  
52  
53 one a dorsal view. We will also ask patients to mark their single 'most painful' site on one of  
54  
55 these body charts. Pain drawing data will be collected using a custom software application on  
56  
57 a tablet computer, and will be analysed with Matlab software, as described previously.<sup>33</sup> The  
58  
59  
60

1  
2  
3 software automatically calculates the number of shaded pixels from the pain drawing, which  
4 is defined as *pain extent*. Summaries of, and relationships between, pre-defined painful body  
5 regions will also be evaluated. Conventional pain drawing data will also be collected on  
6 paper follow-up questionnaires to assess painful body regions.  
7  
8  
9  
10  
11  
12  
13

### 14 The painDETECT questionnaire

15  
16 It is assumed that all post-trauma patients will have significant nociception at baseline, but  
17 the contribution of other pain-related mechanistic pathways will also be assessed. The  
18 painDETECT questionnaire<sup>55</sup> will be used to facilitate the identification of neuropathic pain.  
19 It consists of 9 items [7 evaluating pain quality, 1 evaluating pain pattern, and 1 evaluating  
20 pain radiation], all of which contribute to an aggregate score [range: -1-38]. This aggregate  
21 score can be divided into three classifications that represent the likelihood of neuropathic  
22 pain: ‘unlikely’ [0-12], ‘ambiguous’ [13–18] and ‘likely’ [19–38].<sup>55</sup> Although developed as a  
23 screening questionnaire for neuropathic pain, painDETECT may also function as a measure  
24 of characteristics that indicate augmented central pain processing.<sup>55</sup> The painDETECT  
25 questionnaire has demonstrated good internal consistency [0.76]<sup>56</sup> and excellent test-re-test  
26 reliability<sup>57</sup> within 1-hour of consultation [ICC{model not reported} 0.911] and 1-week post  
27 consultation [ICC{model not reported} 0.79].<sup>58</sup> Convergent validity has been demonstrated in  
28 comparison to pain severity,<sup>56 59</sup> health-related quality of life<sup>60</sup> and similar neuropathic pain  
29 screening tools.<sup>55</sup> As such, painDETECT outcomes will be measured at regular intervals  
30 while the participant is an inpatient in the hospital [subject to participant accessibility and  
31 assessor availability] to assess for emerging neuropathic pain and sensitization.  
32  
33  
34  
35  
36  
37  
38  
39  
40  
41  
42  
43  
44  
45  
46  
47  
48  
49  
50  
51  
52  
53  
54  
55  
56  
57  
58  
59  
60

Measurements will also be taken at all follow-up assessment points.

### *Quantitative sensory testing [QST]*

1  
2  
3  
4  
5 QST methods will be used to assess pain sensibility, throughout which measurements will be  
6  
7 concealed from participants. Owing to the clinical heterogeneity of the post-trauma  
8  
9 population, precise standardisation of test sites between participants will not be possible.  
10  
11 Instead, we have developed a standardised protocol that will be used to evaluate pain  
12  
13 thresholds for multiple stimulus modalities [mechanical pressure, heat and cold] at the same  
14  
15 sites in each participant. Each site where multi-modality pain threshold testing is performed  
16  
17 will be within the receptive field of the same nerve root using described regions,<sup>61</sup> so that  
18  
19 segmental cross-modality excitability may be compared. All pain thresholds will be measured  
20  
21 at the same 'local' and 'remote' sites for each participant. We define local sites as being  
22  
23 uninjured but within [or, if not accessible, as close as possible to] the same receptive field as  
24  
25 the most painful injured tissue [e.g. skin over gastrocnemius in a participant with an ankle  
26  
27 fracture]. By contrast, we define remote sites as a distant, accessible, site from the receptive  
28  
29 fields in which tissues are injured [e.g. skin over tibialis anterior in a participant without  
30  
31 lower limb injury], and on the contralateral side of the body where injured tissue is unilateral.  
32  
33 Where possible, remote sites will be a mirror-image of the local site [to allow for comparison  
34  
35 of absolute values], but in a trauma population we are aware that this may not always be  
36  
37 possible. For all threshold testing modalities, an ascending method of limits design<sup>62</sup> will be  
38  
39 used, whereby stimulus intensity will begin at a low level and gradually increase until the  
40  
41 participant first perceives pain. Participants will be instructed to push a button or tell the  
42  
43 assessor when the sensation has changed from one of the stimulus alone [e.g. just pressure] to  
44  
45 a sensation of both the stimulus and pain [e.g. pressure and pain]. Following a brief  
46  
47 demonstration of equipment to familiarise participants, two consecutive assessments will be  
48  
49 performed for each modality at each site, and the means used for further analysis.<sup>63</sup> A  
50  
51 minimum of 30-seconds inter-stimulus interval will be given between each threshold  
52  
53  
54  
55  
56  
57  
58  
59  
60

1  
2  
3 measurement within a single session. Measurements will be taken at baseline, while the  
4  
5 participant is an inpatient in the hospital; we will aim to collect data as frequently as every 48  
6  
7 hours to gain accurate rate-of-change data, but this will depend upon participant accessibility  
8  
9 and assessor availability. To ensure pain thresholds are consistently measured at the same  
10  
11 sites every session, sites will be labelled using a sterile, skin marking pen [Schuco Ltd, UK].  
12  
13 Because sites cannot be standardised between participants, the rates-of-change of these values  
14  
15 will be used as candidate predictive variables, to allow for comparisons between participants.  
16  
17 The order of pain threshold testing will be randomly assigned by modality at each session to  
18  
19 avoid order effects.  
20  
21  
22  
23  
24  
25

26 Thermal [heat and cold] pain thresholds will be measured using skin-contact stimulation,  
27  
28 using the same thermode at the same sites, within specified local and remote dermatomes.  
29  
30 Thermal pain threshold assessments will be performed by delivering thermal stimuli directly  
31  
32 to the skin through a metal 30x30 mm Peltier thermode, using a TSA-II NeuroSensory  
33  
34 Analyzer thermal stimulator and accompanying software [Medoc Ltd, Israel]. To evaluate  
35  
36 heat pain threshold, temperature will be gradually increased, at a rate of 1°C/s from a  
37  
38 'neutral' baseline of 32°C, to a maximum temperature of 50.5°C to avoid thermal injury.<sup>64</sup>  
39  
40 During each measurement, participants will be instructed to press a button when the stimulus  
41  
42 becomes painful, and this will be documented as the threshold value. Once pain threshold is  
43  
44 achieved [and recorded], the temperature will return to the baseline value at the same rate  
45  
46 [1°C/s]. For cold pain threshold measurements, the temperature will be gradually reduced, at  
47  
48 a rate of 1°C/s from the baseline of 32°C, to a minimum temperature of 0°C,<sup>64</sup> before also  
49  
50 returning to baseline at a rate of 1°C/s.  
51  
52  
53  
54  
55  
56  
57  
58  
59  
60

1  
2  
3 Pressure pain thresholds will be measured using a digital pressure algometer [Series 7 force  
4 gauge, Mark-10 Corporation, USA], providing real-time force measurement and an analogue  
5 output that can be linked to a computer. Skin and muscle tissue are simultaneously stimulated  
6 during pressure threshold testing; sites will therefore be chosen where a dermatome and  
7 myotome are likely to share a common nerve root innervation [e.g. skin over tibialis  
8 anterior]. The algometer has a hard rubber circular contact tip of 1.2cm<sup>2</sup> area, with no sharp  
9 edges so to avoid an uneven pressure stimulus.<sup>65</sup> In order to preserve hygiene and attend to  
10 infection control measures in trauma patients, the contact tip will be covered with a clean,  
11 thin disposable covering. The tip will be applied perpendicular to the skin at a constant rate of  
12 pressure increase of 50kPa/s [6.0N/s using the 1.2cm<sup>2</sup> tip], until the first onset of pain. For  
13 each measurement, pressure will be unloaded immediately once the participant indicates that  
14 their pain threshold has been reached.  
15  
16  
17  
18  
19  
20  
21  
22  
23  
24  
25  
26  
27  
28  
29  
30  
31  
32

33 To measure excitability of nociceptive pathways in response to mechanical stimuli, a series of  
34 repetitive, pressure stimulus 'pulses' will be applied via the digital algometer, with the aim of  
35 provoking temporal summation responses.<sup>66-68</sup> A minimum of 2 minutes after all threshold  
36 tests have been completed, a series of 10 consecutive pressure pulses will be applied at the  
37 remote and local sites [the order of site being randomly assigned]. The peak pressure reached  
38 during each pulse will be the mean pressure pain threshold that was measured for that  
39 particular site, as described previously. For each pulse, pressure will be gradually increased to  
40 the peak value over a period of 5 seconds, maintained at that peak value for 1 second, and  
41 then immediately released. A 5 second inter-stimulus interval will be used between pulses,  
42 during which the tip of the algometer will remain in contact with the skin. Pain intensity from  
43 the pulses will be rated on a numerical rating scale [0 being 'no pain' to 10 being 'pain as bad  
44 as could be']. In the event that participants indicate that pain has become intolerable, the  
45  
46  
47  
48  
49  
50  
51  
52  
53  
54  
55  
56  
57  
58  
59  
60

1  
2  
3 sequence will be stopped immediately, and the NRS score and number of impulses performed  
4  
5 at that point will be noted.  
6  
7  
8  
9

### 10 *Biomarkers*

11  
12  
13  
14 Serum levels of C-reactive protein [CRP] will be used as a biomarker for inflammation. CRP  
15  
16 is an acute-phase response protein produced by hepatocytes and is usually found in  
17  
18 concentrations of 0.3 to 1.7 mg/l<sup>69</sup>. Increased production is due to cytokine-dependent  
19  
20 induction of synthesis and elevated levels may be detected within eight hours of a stimulus  
21  
22 and can reach 500 mg/l.<sup>28</sup> Besides trauma,<sup>70</sup> elevated levels of CRP may be seen in  
23  
24 conditions such as autoimmune disease, infection and malignancy. It has also been associated  
25  
26 with acute sciatica.<sup>71</sup> The level of CRP usually peaks within 48 hours of the stimulus. In  
27  
28 contrast, when the stimulus for increased production completely ceases, the circulating CRP  
29  
30 concentration falls rapidly, at almost the rate of plasma CRP clearance.<sup>72</sup> A fall in serial  
31  
32 measurements usually indicates resolution of the underlying process, while persisting  
33  
34 elevated levels indicates ongoing inflammation.<sup>73</sup> Where possible, measurements of serum  
35  
36 CRP will be repeatedly taken on a 48 hour schedule while the participant is an inpatient;  
37  
38 absolute and rates of change of CRP values will be used as candidate predictive factors.<sup>74</sup>  
39  
40  
41  
42  
43  
44  
45  
46

47 Mitochondrial DNA [mtDNA] will be used as an indicator of tissue damage. It is released  
48  
49 from cells when they are damaged and is thought to be one of the important initiators of  
50  
51 systemic inflammatory responses following tissue injury known as Damage Associated  
52  
53 Molecular Patterns [DAMPs].<sup>75</sup> Clinical outcomes in trauma patients have been related to  
54  
55 plasma mtDNA concentration.<sup>76 77</sup> Other work with severe trauma patients has shown that  
56  
57 mtDNA values rise to their peak value in the second week post-trauma, and then gradually  
58  
59  
60

1  
2  
3 return to baseline values after approximately 2 months.<sup>78</sup> Where possible, measurements of  
4  
5 serum mtDNA will be repeatedly taken on a 48 hour schedule while the participant is an  
6  
7 inpatient; absolute values and rates of change of mtDNA values will be used as candidate  
8  
9 prognostic factors.  
10  
11  
12  
13  
14  
15  
16  
17  
18  
19  
20  
21  
22  
23  
24  
25  
26  
27  
28  
29  
30  
31  
32  
33  
34  
35  
36  
37  
38  
39  
40  
41  
42  
43  
44  
45  
46  
47  
48  
49  
50  
51  
52  
53  
54  
55  
56  
57  
58  
59  
60

For peer review only

## References

1. Stewart AL, Greenfield S, Hays RD, et al. Functional status and well-being of patients with chronic conditions. Results from the Medical Outcomes Study. *JAMA* 1989;262(7):907-13.
2. Ware JE, Jr., Sherbourne CD. The MOS 36-item short-form health survey (SF-36). I. Conceptual framework and item selection. *Med Care* 1992;30(6):473-83.
3. Hays RD, Sherbourne CD, Mazel RM. The RAND 36-Item Health Survey 1.0. *Health Econ* 1993;2(3):217-27.
4. McHorney CA, Ware JE, Jr., Raczek AE. The MOS 36-Item Short-Form Health Survey (SF-36): II. Psychometric and clinical tests of validity in measuring physical and mental health constructs. *Med Care* 1993;31(3):247-63.
5. Revell MP, Pynsent, P.B., Abudu, A., Fairbank, J.C.T. . Trauma Scores and Trauma Outcome Measures *Trauma* 2003;5:61-70.
6. Ware J. SF-36 Health Survey Updated. *Spine* 2000;25(24):3130-39.
7. Dattani R, Slobogean, G.P., O'Brien, P.J., Broekhuysse, H.M., Blachut, P.A., Guy, P., Lefavre, K.A. Psychometric Analysis of Measuring Functional Outcomes in Tibial Plateau Fractures using the Short Form (SF-36), Short Musculoskeletal Function Assessment (SMFA) and the Western Ontario McMaster Osteoarthritis (WOMAC) Questionnaires. *Injury Int J Care Injured* 2013;44:825-29.
8. Brooks R. EuroQol: the current state of play. *Health Policy* 1996;37(1):53-72.
9. Janssen MF, Birnie E, Haagsma JA, et al. Comparing the standard EQ-5D three-level system with a five-level version. *Value Health* 2008;11(2):275-84. doi: 10.1111/j.1524-4733.2007.00230.x
10. Janssen MF, Pickard AS, Golicki D, et al. Measurement properties of the EQ-5D-5L compared to the EQ-5D-3L across eight patient groups: a multi-country study. *Qual Life Res* 2013;22(7):1717-27. doi: 10.1007/s11136-012-0322-4
11. Mahoney FI, Barthel DW. Functional Evaluation: The Barthel Index. *Md State Med J* 1965;14:61-5.
12. Shah S, Vanclay F, Cooper B. Improving the sensitivity of the Barthel Index for stroke rehabilitation. *J Clin Epidemiol* 1989;42(8):703-9.
13. Hseuh IP, Lee, M.M., Hsieh, C.L. . Psychometric Characteristics of the Barthel Activities of Daily Living Index in Stroke Patients *J Formos Med Assoc* 2001;100(526-532)
14. Hseuh IP, Lin, J.H., Jeng, J.S., Hsieh, C.L. Comparison of the Psychometric Characteristics of the Functional Independence Measure, 5 Item Barthel Index and 10 Item Barthel Index in Patients with Stroke. *J Neurol Neurosurg Psychiatry* 2002;73:188-90.
15. Hsieh YW, Wang, C.H., Wu, S.C., Chen, P.C., Sheu, C.F., Hsieh, C.L. . Establishing the Minimally Clinically Important Difference of the Barthel Index in Stroke Patients. *Neurorehabilitation and Neural Repair* 2007;21(3):233-38.
16. Hobart JC, Thompson AJ. The five item Barthel index. *J Neurol Neurosurg Psychiatry* 2001;71(2):225-30.
17. Eriksen HR, Ihlebaek C, Ursin H. A scoring system for subjective health complaints (SHC). *Scand J Public Health* 1999;27(1):63-72.
18. Zigmond AS, Snaith RP. The hospital anxiety and depression scale. *Acta Psychiatr Scand* 1983;67(6):361-70.
19. Bjelland I, Dahl AA, Haug TT, et al. The validity of the Hospital Anxiety and Depression Scale. An updated literature review. *J Psychosom Res* 2002;52(2):69-77.
20. Wang W, Chair, S.Y., Thompson, D.R., Twinn, S.F. A Psychometric Evaluation of the Chinese Version of the Hospital Anxiety and Depression Scale in Patients with Coronary Heart Disease *Journal of Clinical Nursing* 2009;18:1908-15.
21. Harland NJ GK. Development of the coping strategies questionnaire 24, a clinically utilitarian version of the coping strategies questionnaire. *Rehabilitation Psychology* 2003;48(4):296-300.

22. Rosenstiel AK KF. The use of coping strategies in chronic low back pain patients: Relationship to patient characteristics and current adjustment. . *Pain* 1983;17: 33–44.
23. Chiu C JJ, Fujikawa M, Strand D, Cheing G, Lee G, Chan F Measurement Structure of the Coping Strategies Questionnaire-24 in a Sample of Individuals with Musculoskeletal Pain: A Confirmatory Factor Analysis. . *Rehabilitation Research, Policy, and Education* 2014;28(2):80-90.
24. Paul Campbell NEF, Elaine Thomas, and Kate M. Dunn. Prognostic Indicators of Low Back Pain in Primary Care: Five-Year Prospective Study. *J Pain* 2013;14(8):873–83.
25. Woby SR, Roach NK, Urmston M, et al. Psychometric properties of the TSK-11: a shortened version of the Tampa Scale for Kinesiophobia. *Pain* 2005;117(1-2):137-44. doi: 10.1016/j.pain.2005.05.029
26. Miller RP KS, Todd D. The Tampa Scale: a measure of kinesiophobia. *Clin J Pain* 1991;7(1):51-52.
27. Swinkels-Meewisse EJCM, Swinkels, R.A.H.M., Verbeek, A.L.M., Vlaeyen, J.W.S. . Psychometric Properties of the Tampa Scale for Kinesiophobia and the Fear Avoidance Beliefs Questionnaire in Acute Low Back Pain *Manual Therapy* 2003;8(1):29-36.
28. Kall LB. Psychological determinants of quality of life in patients with whiplash associated disorders-a prospective study. *Disabil Rehabil* 2009;31(3):227-36. doi: 10.1080/09638280801912030
29. M.K. N. The pain self-efficacy questionnaire: Taking pain into account. *Eur J Pain* 2007;11(2):153-63.
30. Horowitz M, Wilner N, Alvarez W. Impact of Event Scale: a measure of subjective stress. *Psychosom Med* 1979;41(3):209-18.
31. Beck JG, Grant DM, Read JP, et al. The impact of event scale-revised: psychometric properties in a sample of motor vehicle accident survivors. *J Anxiety Disord* 2008;22(2):187-98. doi: 10.1016/j.janxdis.2007.02.007
32. Creamer M, Bell R, Failla S. Psychometric properties of the Impact of Event Scale - Revised. *Behav Res Ther* 2003;41(12):1489-96.
33. Barbero M, Mores, F., Leoni, D., Gatti, R., Egloff, M., Falla, D. Test-retest reliability of pain extent and pain location using a novel method for pain drawing analysis. *European Journal of Pain* 2015;19:1129-38.
34. Baker SP, O'Neill B. The injury severity score: an update. *J Trauma* 1976;16(11):882-5.
35. Akmal M, Trivedi R, Sutcliffe J. Functional outcome in trauma patients with spinal injury. *Spine (Phila Pa 1976)* 2003;28(2):180-5. doi: 10.1097/01.BRS.0000041577.12233.96
36. Baker SP, O'Neill B, Haddon W, Jr., et al. The injury severity score: a method for describing patients with multiple injuries and evaluating emergency care. *J Trauma* 1974;14(3):187-96.
37. Linn S. The injury severity score--importance and uses. *Ann Epidemiol* 1995;5(6):440-6.
38. Sears JM, Blonar L, Bowman SM. Predicting work-related disability and medical cost outcomes: a comparison of injury severity scoring methods. *Injury* 2014;45(1):16-22. doi: 10.1016/j.injury.2012.12.024
39. NICE. Low back pain and sciatica in over 16s: assessment and management  
NICE guideline [NG59]: National Institute for Health and Care Excellence, 2016.
40. Von Korff M, Ormel J, Keefe FJ, et al. Grading the severity of chronic pain. *Pain* 1992;50(2):133-49.
41. Jensen MP, McFarland CA. Increasing the reliability and validity of pain intensity measurement in chronic pain patients. *Pain* 1993;55(2):195-203.
42. Jensen MP, Turner, J.A. and Romano, J.M. . What is the maximum number of levels needed in pain intensity measurement? . *Pain* 1994;58:387–92.
43. Jensen MP, Turner, L.R., Turner, J.A. and Romano, J.M. The use of multiple-item scales for pain intensity measurement in chronic pain patients. *Pain* 1996;67:35–40.
44. Jensen MP, Turner JA, Romano JM, et al. Comparative reliability and validity of chronic pain intensity measures. *Pain* 1999;83(2):157-62.

- 1  
2  
3 45. Von Korff M. Epidemiological and survey methods – assessment of chronic pain. In Turk, D.C. and  
4 Melzack, R., editors, Handbook of Pain Assessment. . New York, USA: Guildford Press  
5 2001:603-18.  
6  
7 46. Farrar JT, Young JP, Jr., LaMoreaux L, et al. Clinical importance of changes in chronic pain  
8 intensity measured on an 11-point numerical pain rating scale. *Pain* 2001;94(2):149-58.  
9  
10 47. Salaffi F, Stancati A, Silvestri CA, et al. Minimal clinically important changes in chronic  
11 musculoskeletal pain intensity measured on a numerical rating scale. *Eur J Pain*  
12 2004;8(4):283-91. doi: 10.1016/j.ejpain.2003.09.004  
13  
14 48. Childs JD, Piva SR, Fritz JM. Responsiveness of the numeric pain rating scale in patients with low  
15 back pain. *Spine (Phila Pa 1976)* 2005;30(11):1331-4.  
16  
17 49. Ostelo RW, Deyo, R.A., Stratford, P., Waddell, G., Croft, P., Von Korff, M., Bouter, L.M. and  
18 Henrica, C. Interpreting change scores for pain and functional status in low back pain:  
19 towards international consensus regarding minimal important change. *Spine* 2008;33(1):90-  
20 94.  
21  
22 50. Michener LA, Snyder AR, Leggin BG. Responsiveness of the numeric pain rating scale in patients  
23 with shoulder pain and the effect of surgical status. *J Sport Rehabil* 2011;20(1):115-28.  
24  
25 51. Masters Steedman S, Middaugh SJ, Kee WG, et al. Chronic-pain medications: equivalence levels  
26 and method of quantifying usage. *Clin J Pain* 1992;8(3):204-14.  
27  
28 52. Harden RN, Weinland SR, Remble TA, et al. Medication Quantification Scale Version III: update in  
29 medication classes and revised detriment weights by survey of American Pain Society  
30 Physicians. *J Pain* 2005;6(6):364-71. doi: 10.1016/j.jpain.2005.01.350  
31  
32 53. Gallizzi M GC, Harden RN, Stanos S, Khan A. Medication Quantification Scale Version III: internal  
33 validation of detriment weights using a chronic pain population. . *Pain Pract* 2008;8(1):1-4.  
34  
35 54. KJ S, WG K, S S, et al. Medication quantification scores and evaluation of patient pharmacology  
36 profiles. *Current Review of Pain* 1998;2(3):171-74.  
37  
38 55. Freynhagen R, Baron R, Gockel U, et al. painDETECT: a new screening questionnaire to identify  
39 neuropathic components in patients with back pain. *Curr Med Res Opin* 2006;22(10):1911-  
40 20. doi: 10.1185/030079906X132488  
41  
42 56. Cappelleri JC, Koduru V, Bienen EJ, et al. A cross-sectional study examining the psychometric  
43 properties of the painDETECT measure in neuropathic pain. *J Pain Res* 2015;8(8):159-67. doi:  
44 10.2147/JPR.S80046  
45  
46 57. Keller T, Freynhagen R, Tolle TR, et al. A retrospective analysis of the long-term test-retest  
47 stability of pain descriptors of the painDETECT questionnaire. *Curr Med Res Opin*  
48 2016;32(2):343-9. doi: 10.1185/03007995.2015.1125869  
49  
50 58. Tampin B, Bohne T, Callan M, et al. Reliability of the English version of the painDETECT  
51 questionnaire. *Curr Med Res Opin* 2017;33(4):741-48. doi: 10.1080/03007995.2017.1278682  
52  
53 59. Sadosky A, Koduru V, Bienen EJ, et al. Characterizing individual painDETECT symptoms by  
54 average pain severity. *Clinicoecon Outcomes Res* 2016;8:361-6. doi: 10.2147/CEOR.S105402  
55  
56 60. Cappelleri JC, Koduru V, Bienen EJ, et al. Mapping painDETECT, a neuropathic pain screening tool,  
57 to the EuroQol (EQ-5D-3L). *Qual Life Res* 2017;26(2):467-77. doi: 10.1007/s11136-016-1379-  
58 2  
59  
60 61. M OB. Aids to the Examination of the Peripheral Nervous System: Saunders (Elsevier) 2010.  
62. T. Palmer DJM, Wilma M. Steedman, John Ravey, S. C-and Aδ-fibre mediated thermal perception:  
response to rate of temperature change using method of limits. . *Somatosensory & motor  
research* 2000;17(4):325-33.  
63. Chesterton LS SJ, Wright CC, Foster NE. Interrater reliability of algometry in measuring pressure  
pain thresholds in healthy humans, using multiple raters. *Clin J Pain* 2007;23(9):760-6.  
64. Knutti IA SM, Opsommer E. Test-retest reliability of thermal quantitative sensory testing on two  
sites within the L5 dermatome of the lumbar spine and lower extremity. *Neurosci Lett*  
2014;5(579):157-62.

- 1  
2  
3 65. Greenspan JD, McGillis SL. Stimulus features relevant to the perception of sharpness and  
4 mechanically evoked cutaneous pain. *Somatosens Mot Res* 1991;8(2):137-47.  
5  
6 66. Sarlani E, Greenspan JD. Gender differences in temporal summation of mechanically evoked  
7 pain. *Pain* 2002;97(1-2):163-9.  
8  
9 67. Nie H, Arendt-Nielsen L, Andersen H, et al. Temporal summation of pain evoked by mechanical  
10 stimulation in deep and superficial tissue. *J Pain* 2005;6(6):348-55. doi:  
11 10.1016/j.jpain.2005.01.352  
12  
13 68. Nie H, Arendt-Nielsen L, Madeleine P, et al. Enhanced temporal summation of pressure pain in  
14 the trapezius muscle after delayed onset muscle soreness. *Exp Brain Res* 2006;170(2):182-  
15 90. doi: 10.1007/s00221-005-0196-6  
16  
17 69. Whicher JT ES. Acute phase proteins. *Hosp Update* 1990:899-905.  
18  
19 70. Gosling P, Dickson GR. Serum c-reactive protein in patients with serious trauma. *Injury*  
20 1992;23(7):483-6.  
21  
22 71. Sturmer T, Raum E, Buchner M, et al. Pain and high sensitivity C reactive protein in patients with  
23 chronic low back pain and acute sciatic pain. *Ann Rheum Dis* 2005;64(6):921-5. doi:  
24 10.1136/ard.2004.027045  
25  
26 72. Pepys MB, Hirschfield GM. C-reactive protein: a critical update. *J Clin Invest* 2003;111(12):1805-  
27 12. doi: 10.1172/JCI18921  
28  
29 73. Giannoudis PV HF, Pape HC. . Inflammatory serum markers in patients with multiple trauma. Can  
30 they predict outcome? *J Bone Joint Surg Br* 2004;86(3):313-23.  
31  
32 74. Barma M, Goodbrand, J.A., Donnan, P.T., McGilchrist, M.M., Frost, H., McMurdo, M.E. and  
33 Witham, M.D. Slower Decline in C-Reactive Protein after an Inflammatory Insult Is  
34 Associated with Longer Survival in Older Hospitalised Patients. . *PloS one*  
35 2016;11(7):e0159412.  
36  
37 75. Krysko DV, Agostinis P, Krysko O, et al. Emerging role of damage-associated molecular patterns  
38 derived from mitochondria in inflammation. *Trends Immunol* 2011;32(4):157-64. doi:  
39 10.1016/j.it.2011.01.005  
40  
41 76. Simmons JD, Lee YL, Mulekar S, et al. Elevated levels of plasma mitochondrial DNA DAMPs are  
42 linked to clinical outcome in severely injured human subjects. *Ann Surg* 2013;258(4):591-6;  
43 discussion 96-8. doi: 10.1097/SLA.0b013e3182a4ea46  
44  
45 77. Yamanouchi S, Kudo D, Yamada M, et al. Plasma mitochondrial DNA levels in patients with  
46 trauma and severe sepsis: time course and the association with clinical status. *J Crit Care*  
47 2013;28(6):1027-31. doi: 10.1016/j.jcrc.2013.05.006  
48  
49 78. MA F. Steroids and immunity from injury through to rehabilitation (SIR Study). University of  
50 Birmingham, 2013.  
51  
52  
53  
54  
55  
56  
57  
58  
59  
60



SPIRIT 2013 Checklist: Recommended items to address in a clinical trial protocol and related documents\*

| Section/item                      | Item No | Description                                                                                                                                                                                                                                                                                        |
|-----------------------------------|---------|----------------------------------------------------------------------------------------------------------------------------------------------------------------------------------------------------------------------------------------------------------------------------------------------------|
| <b>Administrative information</b> |         |                                                                                                                                                                                                                                                                                                    |
| Title                             | 1       | Descriptive title identifying the study design, population, interventions, and, if applicable, trial acronym – Page 1                                                                                                                                                                              |
| Trial registration                | 2a      | Trial identifier and registry name. If not yet registered, name of intended registry – N/A                                                                                                                                                                                                         |
|                                   | 2b      | All items from the World Health Organization Trial Registration Data Set – N/A                                                                                                                                                                                                                     |
| Protocol version                  | 3       | Date and version identifier – Page 1                                                                                                                                                                                                                                                               |
| Funding                           | 4       | Sources and types of financial, material, and other support – Page 25                                                                                                                                                                                                                              |
| Roles and responsibilities        | 5a      | Names, affiliations, and roles of protocol contributors – Pages 1, 25                                                                                                                                                                                                                              |
|                                   | 5b      | Name and contact information for the trial sponsor – Page 25                                                                                                                                                                                                                                       |
|                                   | 5c      | Role of study sponsor and funders, if any, in study design; collection, management, analysis, and interpretation of data; writing of the report; and the decision to submit the report for publication, including whether they will have ultimate authority over any of these activities – Page 25 |
|                                   | 5d      | Composition, roles, and responsibilities of the coordinating centre, steering committee, endpoint adjudication committee, data management team, and other individuals or groups overseeing the trial, if applicable (see Item 21a for data monitoring committee) – Page 25                         |
| <b>Introduction</b>               |         |                                                                                                                                                                                                                                                                                                    |
| Background and rationale          | 6a      | Description of research question and justification for undertaking the trial, including summary of relevant studies (published and unpublished) examining benefits and harms for each intervention – Page 5 (introduction, page 6 (aims and objectives)                                            |
|                                   | 6b      | Explanation for choice of comparators – Supplementary file                                                                                                                                                                                                                                         |
| Objectives                        | 7       | Specific objectives or hypotheses (Page 6)                                                                                                                                                                                                                                                         |

1 Trial design 8 Description of trial design including type of trial (eg, parallel group,  
2 crossover, factorial, single group), allocation ratio, and framework (eg,  
3 superiority, equivalence, noninferiority, exploratory) – Page 7  
4  
5  
6

7 **Methods: Participants, interventions, and outcomes**  
8

9 Study setting 9 Description of study settings (eg, community clinic, academic hospital)  
10 and list of countries where data will be collected. Reference to where  
11 list of study sites can be obtained – Page 7  
12

13 Eligibility criteria 10 Inclusion and exclusion criteria for participants. If applicable, eligibility  
14 criteria for study centres and individuals who will perform the  
15 interventions (eg, surgeons, psychotherapists) – Pages 8-10  
16

17 Interventions 11a Interventions for each group with sufficient detail to allow replication,  
18 including how and when they will be administered – N/A  
19

20 11b Criteria for discontinuing or modifying allocated interventions for a  
21 given trial participant (eg, drug dose change in response to harms,  
22 participant request, or improving/worsening disease) – N/A  
23

24 11c Strategies to improve adherence to intervention protocols, and any  
25 procedures for monitoring adherence (eg, drug tablet return,  
26 laboratory tests) – N/A  
27

28 11d Relevant concomitant care and interventions that are permitted or  
29 prohibited during the trial – N/A  
30

31 Outcomes 12 Primary, secondary, and other outcomes, including the specific  
32 measurement variable (eg, systolic blood pressure), analysis metric  
33 (eg, change from baseline, final value, time to event), method of  
34 aggregation (eg, median, proportion), and time point for each  
35 outcome. Explanation of the clinical relevance of chosen efficacy and  
36 harm outcomes is strongly recommended – Page 10 (primary  
37 outcome), Supplementary file (candidate predictors)  
38  
39

40 Participant 13 Time schedule of enrolment, interventions (including any run-ins and  
41 timeline washouts), assessments, and visits for participants. A schematic  
42 diagram is highly recommended (see Figure) – Pages 8-10  
43  
44

45 Sample size 14 Estimated number of participants needed to achieve study objectives  
46 and how it was determined, including clinical and statistical  
47 assumptions supporting any sample size calculations – Pages 14-15  
48

49 Recruitment 15 Strategies for achieving adequate participant enrolment to reach  
50 target sample size – Pages 14-15  
51

52 **Methods: Assignment of interventions (for controlled trials)**  
53

54 Allocation:  
55  
56  
57  
58  
59  
60

|    |                |     |                                                                         |
|----|----------------|-----|-------------------------------------------------------------------------|
| 1  |                |     |                                                                         |
| 2  | Sequence       | 16a | Method of generating the allocation sequence (eg, computer-             |
| 3  | generation     |     | generated random numbers), and list of any factors for stratification.  |
| 4  |                |     | To reduce predictability of a random sequence, details of any planned   |
| 5  |                |     | restriction (eg, blocking) should be provided in a separate document    |
| 6  |                |     | that is unavailable to those who enrol participants or assign           |
| 7  |                |     | interventions – N/A                                                     |
| 8  |                |     |                                                                         |
| 9  | Allocation     | 16b | Mechanism of implementing the allocation sequence (eg, central          |
| 10 | concealment    |     | telephone; sequentially numbered, opaque, sealed envelopes),            |
| 11 | mechanism      |     | describing any steps to conceal the sequence until interventions are    |
| 12 |                |     | assigned – N/A                                                          |
| 13 |                |     |                                                                         |
| 14 | Implementation | 16c | Who will generate the allocation sequence, who will enrol participants, |
| 15 |                |     | and who will assign participants to interventions – N/A                 |
| 16 |                |     |                                                                         |
| 17 | Blinding       | 17a | Who will be blinded after assignment to interventions (eg, trial        |
| 18 | (masking)      |     | participants, care providers, outcome assessors, data analysts), and    |
| 19 |                |     | how N/A                                                                 |
| 20 |                |     |                                                                         |
| 21 |                | 17b | If blinded, circumstances under which unblinding is permissible, and    |
| 22 |                |     | procedure for revealing a participant's allocated intervention during   |
| 23 |                |     | the trial – N/A                                                         |
| 24 |                |     |                                                                         |
| 25 |                |     |                                                                         |

### Methods: Data collection, management, and analysis

|    |                 |     |                                                                          |
|----|-----------------|-----|--------------------------------------------------------------------------|
| 26 |                 |     |                                                                          |
| 27 |                 |     |                                                                          |
| 28 | Data collection | 18a | Plans for assessment and collection of outcome, baseline, and other      |
| 29 | methods         |     | trial data, including any related processes to promote data quality (eg, |
| 30 |                 |     | duplicate measurements, training of assessors) and a description of      |
| 31 |                 |     | study instruments (eg, questionnaires, laboratory tests) along with      |
| 32 |                 |     | their reliability and validity, if known. Reference to where data        |
| 33 |                 |     | collection forms can be found, if not in the protocol – Pages 10-14,     |
| 34 |                 |     | Supplementary file                                                       |
| 35 |                 |     |                                                                          |
| 36 |                 | 18b | Plans to promote participant retention and complete follow-up,           |
| 37 |                 |     | including list of any outcome data to be collected for participants who  |
| 38 |                 |     | discontinue or deviate from intervention protocols – Page 9              |
| 39 |                 |     | (withdrawals)                                                            |
| 40 |                 |     |                                                                          |
| 41 |                 |     |                                                                          |
| 42 | Data            | 19  | Plans for data entry, coding, security, and storage, including any       |
| 43 | management      |     | related processes to promote data quality (eg, double data entry;        |
| 44 |                 |     | range checks for data values). Reference to where details of data        |
| 45 |                 |     | management procedures can be found, if not in the protocol – Page        |
| 46 |                 |     | 14                                                                       |
| 47 |                 |     |                                                                          |
| 48 | Statistical     | 20a | Statistical methods for analysing primary and secondary outcomes.        |
| 49 | methods         |     | Reference to where other details of the statistical analysis plan can be |
| 50 |                 |     | found, if not in the protocol – Page 15-16                               |
| 51 |                 |     |                                                                          |
| 52 |                 | 20b | Methods for any additional analyses (eg, subgroup and adjusted           |
| 53 |                 |     | analyses) – Page 16 (screening tool development and validation)          |
| 54 |                 |     |                                                                          |
| 55 |                 |     |                                                                          |
| 56 |                 |     |                                                                          |
| 57 |                 |     |                                                                          |
| 58 |                 |     |                                                                          |
| 59 |                 |     |                                                                          |
| 60 |                 |     |                                                                          |

1  
2  
3  
4  
5  
6  
7  
8  
9  
10  
11  
12  
13  
14  
15  
16  
17  
18  
19  
20  
21  
22  
23  
24  
25  
26  
27  
28  
29  
30  
31  
32  
33  
34  
35  
36  
37  
38  
39  
40  
41  
42  
43  
44  
45  
46  
47  
48  
49  
50  
51  
52  
53  
54  
55  
56  
57  
58  
59  
60

20c Definition of analysis population relating to protocol non-adherence (eg, as randomised analysis), and any statistical methods to handle missing data (eg, multiple imputation) – Page 15 (imputation)

### Methods: Monitoring

Data monitoring 21a Composition of data monitoring committee (DMC); summary of its role and reporting structure; statement of whether it is independent from the sponsor and competing interests; and reference to where further details about its charter can be found, if not in the protocol. Alternatively, an explanation of why a DMC is not needed – N/A

21b Description of any interim analyses and stopping guidelines, including who will have access to these interim results and make the final decision to terminate the trial – N/A

Harms 22 Plans for collecting, assessing, reporting, and managing solicited and spontaneously reported adverse events and other unintended effects of trial interventions or trial conduct – N/A

Auditing 23 Frequency and procedures for auditing trial conduct, if any, and whether the process will be independent from investigators and the sponsor – N/A

### Ethics and dissemination

Research ethics approval 24 Plans for seeking research ethics committee/institutional review board (REC/IRB) approval – Pages 19-20

Protocol amendments 25 Plans for communicating important protocol modifications (eg, changes to eligibility criteria, outcomes, analyses) to relevant parties (eg, investigators, REC/IRBs, trial participants, trial registries, journals, regulators) – N/A

Consent or assent 26a Who will obtain informed consent or assent from potential trial participants or authorised surrogates, and how (see Item 32) – Pages 9-10

26b Additional consent provisions for collection and use of participant data and biological specimens in ancillary studies, if applicable – N/A

Confidentiality 27 How personal information about potential and enrolled participants will be collected, shared, and maintained in order to protect confidentiality before, during, and after the trial – Page 14

Declaration of interests 28 Financial and other competing interests for principal investigators for the overall trial and each study site – Page 25

Access to data 29 Statement of who will have access to the final trial dataset, and disclosure of contractual agreements that limit such access for investigators – Not present

|    |                   |     |                                                                              |
|----|-------------------|-----|------------------------------------------------------------------------------|
| 1  |                   |     |                                                                              |
| 2  | Ancillary and     | 30  | Provisions, if any, for ancillary and post-trial care, and for               |
| 3  | post-trial care   |     | compensation to those who suffer harm from trial participation – N/A         |
| 4  |                   |     |                                                                              |
| 5  | Dissemination     | 31a | Plans for investigators and sponsor to communicate trial results to          |
| 6  | policy            |     | participants, healthcare professionals, the public, and other relevant       |
| 7  |                   |     | groups (eg, via publication, reporting in results databases, or other        |
| 8  |                   |     | data sharing arrangements), including any publication restrictions –         |
| 9  |                   |     | N/A                                                                          |
| 10 |                   |     |                                                                              |
| 11 |                   | 31b | Authorship eligibility guidelines and any intended use of professional       |
| 12 |                   |     | writers – N/A                                                                |
| 13 |                   |     |                                                                              |
| 14 |                   | 31c | Plans, if any, for granting public access to the full protocol, participant- |
| 15 |                   |     | level dataset, and statistical code – N/A                                    |
| 16 |                   |     |                                                                              |
| 17 | <b>Appendices</b> |     |                                                                              |
| 18 |                   |     |                                                                              |
| 19 | Informed consent  | 32  | Model consent form and other related documentation given to                  |
| 20 | materials         |     | participants and authorised surrogates – N/A                                 |
| 21 |                   |     |                                                                              |
| 22 | Biological        | 33  | Plans for collection, laboratory evaluation, and storage of biological       |
| 23 | specimens         |     | specimens for genetic or molecular analysis in the current trial and for     |
| 24 |                   |     | future use in ancillary studies, if applicable – N/A                         |
| 25 |                   |     |                                                                              |

---

26 \*It is strongly recommended that this checklist be read in conjunction with the SPIRIT 2013  
 27 Explanation & Elaboration for important clarification on the items. Amendments to the  
 28 protocol should be tracked and dated. The SPIRIT checklist is copyrighted by the SPIRIT  
 29 Group under the Creative Commons "[Attribution-NonCommercial-NoDerivs 3.0 Unported](#)"  
 30 license.  
 31  
 32  
 33  
 34  
 35  
 36  
 37  
 38  
 39  
 40  
 41  
 42  
 43  
 44  
 45  
 46  
 47  
 48  
 49  
 50  
 51  
 52  
 53  
 54  
 55  
 56  
 57  
 58  
 59  
 60

# BMJ Open

## DEVELOPMENT OF A SCREENING TOOL TO PREDICT THE RISK OF CHRONIC PAIN AND DISABILITY FOLLOWING MUSCULOSKELETAL TRAUMA: PROTOCOL FOR A PROSPECTIVE OBSERVATIONAL STUDY

|                                 |                                                                                                                                                                                                                                                                                                                                                                                                                                                                                                                                                                                                                                                                                                                                                                                                                                            |
|---------------------------------|--------------------------------------------------------------------------------------------------------------------------------------------------------------------------------------------------------------------------------------------------------------------------------------------------------------------------------------------------------------------------------------------------------------------------------------------------------------------------------------------------------------------------------------------------------------------------------------------------------------------------------------------------------------------------------------------------------------------------------------------------------------------------------------------------------------------------------------------|
| Journal:                        | <i>BMJ Open</i>                                                                                                                                                                                                                                                                                                                                                                                                                                                                                                                                                                                                                                                                                                                                                                                                                            |
| Manuscript ID                   | bmjopen-2017-017876.R2                                                                                                                                                                                                                                                                                                                                                                                                                                                                                                                                                                                                                                                                                                                                                                                                                     |
| Article Type:                   | Protocol                                                                                                                                                                                                                                                                                                                                                                                                                                                                                                                                                                                                                                                                                                                                                                                                                                   |
| Date Submitted by the Author:   | 20-Dec-2017                                                                                                                                                                                                                                                                                                                                                                                                                                                                                                                                                                                                                                                                                                                                                                                                                                |
| Complete List of Authors:       | Rushton, Alison; University of Birmingham, School of Sport, Exercise and Rehabilitation Sciences<br>Evans, David; University of Birmingham, School of Sport, Exercise and Rehabilitation Sciences<br>Middlebrook, Nicola; University of Birmingham, School of Sport, Exercise and Rehabilitation Sciences<br>Heneghan, Nicola; University of Birmingham, School of Sport, Exercise and Rehabilitation Sciences<br>Small, Charlotte; University of Birmingham, NIHR Surgical Reconstruction & Microbiology Research Centre<br>Lord, Janet; University of Birmingham, NIHR Surgical Reconstruction & Microbiology Research Centre<br>Patel, Jaimin; University of Birmingham, NIHR Surgical Reconstruction & Microbiology Research Centre<br>Falla, Deborah; University of Birmingham, School of Sport, Exercise and Rehabilitation Sciences |
| <b>Primary Subject Heading</b>: | Rehabilitation medicine                                                                                                                                                                                                                                                                                                                                                                                                                                                                                                                                                                                                                                                                                                                                                                                                                    |
| Secondary Subject Heading:      | Medical management                                                                                                                                                                                                                                                                                                                                                                                                                                                                                                                                                                                                                                                                                                                                                                                                                         |
| Keywords:                       | Musculoskeletal trauma, Precision rehabilitation, Pain mechanisms                                                                                                                                                                                                                                                                                                                                                                                                                                                                                                                                                                                                                                                                                                                                                                          |
|                                 |                                                                                                                                                                                                                                                                                                                                                                                                                                                                                                                                                                                                                                                                                                                                                                                                                                            |

SCHOLARONE™  
Manuscripts

**TITLE PAGE****DEVELOPMENT OF A SCREENING TOOL TO PREDICT THE RISK OF  
CHRONIC PAIN AND DISABILITY FOLLOWING MUSCULOSKELETAL  
TRAUMA: PROTOCOL FOR A PROSPECTIVE OBSERVATIONAL STUDY**

Rushton A<sup>1,2</sup>, Evans DW<sup>1,2</sup>, Middlebrook N<sup>1,2</sup>, Heneghan N<sup>1</sup>, Small C<sup>2</sup>, Lord J<sup>2</sup>, Patel JM<sup>2</sup>,  
Falla D<sup>1,2</sup>.

**Affiliations**

<sup>1</sup> Centre of Precision Rehabilitation for Spinal Pain  
School of Sport, Exercise and Rehabilitation Sciences  
College of Life and Environmental Sciences  
University of Birmingham  
Edgbaston  
Birmingham  
B15 2TT  
United Kingdom

<sup>2</sup> NIHR Surgical Reconstruction & Microbiology Research Centre  
University of Birmingham  
Edgbaston  
Birmingham  
B15 2TT  
United Kingdom

**Correspondence:**

Professor Deborah Falla  
Centre of Precision Rehabilitation for Spinal Pain  
School of Sport, Exercise and Rehabilitation Sciences,  
College of Life and Environmental Sciences,  
University of Birmingham,  
Birmingham, B15 2TT, UK.  
Tel: +44 121 415 4220  
Email: d.falla@bham.ac.uk

## 1 **ABSTRACT**

### 2 **Introduction**

3 Pain is an expected and appropriate experience following traumatic musculoskeletal injury.  
4 By contrast, chronic pain and disability are unhelpful yet common sequelae of trauma-related  
5 injuries. Presently, the mechanisms that underlie the transition from acute to chronic  
6 disabling post-traumatic pain are not fully understood. Such knowledge would facilitate the  
7 development and implementation of precision rehabilitation approaches that match  
8 interventions to projected risk of recovery, with the aim of preventing poor long-term  
9 outcomes. The aim of this study is to identify a set of predictive factors to identify patients at  
10 risk of developing ongoing post-traumatic pain and disability following acute  
11 musculoskeletal trauma. To achieve this, we will use a unique and comprehensive  
12 combination of patient-reported outcome measures, psychophysical testing and biomarkers.

### 14 **Methods/analysis**

15 A prospective observational study will recruit two temporally staggered cohorts [n=250 each  
16 cohort; at least 10 cases per candidate predictor] of consecutive acute musculoskeletal trauma  
17 patients aged  $\geq 16$  years, who are emergency admissions into a Major Trauma Centre in the  
18 United Kingdom, with an episode inception defined as the traumatic event. The first cohort  
19 will identify candidate predictors to develop a screening tool to predict development of  
20 chronic and disabling pain, and the second will allow evaluation of the predictive  
21 performance of the tool [validation]. The outcome being predicted is an individual's absolute  
22 risk of poor outcome measured at 6 months follow-up using the Chronic Pain Grade Scale  
23 [poor outcome  $\geq$  Grade II]. Candidate predictors encompass the four primary mechanisms of  
24 pain: *nociceptive* [e.g. injury location], *neuropathic* [e.g. painDETECT], *inflammatory*  
25 [biomarkers], and *nociplastic* [e.g. quantitative sensory testing]. Concurrently, patient-

1 reported outcome measures will assess general health and psychosocial factors [e.g. pain self-  
2 efficacy]. Risk of poor outcome will be calculated using multiple variable regression analysis.

#### 4 **Ethics and dissemination**

6 NHS Research Ethics Committee and institutional R&D approval are in progress.

#### 8 Keywords

9 Keywords: Pain mechanisms, Prediction, Precision rehabilitation, Musculoskeletal trauma

11 Funding: NIHR SRMRC

#### 13 Word count

14 4228 [excluding tables and references]

## STRENGTHS AND LIMITATIONS OF THIS STUDY

- A comprehensive array of candidate predictive factors will allow for the prediction of chronic and disabling pain following trauma
- These predictive factors will enable the development and validation of a predictive tool to predict good and poor outcome at 6 months post-injury
- The prospective design of the study enables control of unwarranted influences, and enables a stronger case for inferring causal relationships
- Identifying predictive factors related to poor outcome of pain and disability outcome will facilitate targeting of effective interventions
- Other candidate predictors may have been useful to include [e.g. vibration thresholds], but consideration of burden to participants of testing and sample size considerations necessitated prioritisation of candidate predictive factors.

## INTRODUCTION

Pain is an expected and appropriate experience that usually follows traumatic injury.<sup>1</sup> By contrast, chronic pain and disability are unhelpful but common sequelae of trauma-related injuries.<sup>2</sup> Gaining an understanding of why some people develop chronic and disabling post-traumatic pain is therefore a priority for individual patients, the military and society at large. Notwithstanding, the mechanisms that underlie the transition from acute to chronic disabling post-traumatic pain are not fully understood. Such knowledge would facilitate the development and implementation of a clinical pathway of care that matches interventions to projected risk of poor recovery, with the aim of preventing poor long-term outcomes. This project stems from advances in knowledge relating to the assessment and management of pain<sup>3</sup> and the quantification of potential predictive factors to inform personalised rehabilitation; identifying which patients to target with rehabilitation and when and how to target them.

Few studies have specifically explored predictive factors for recovery, whether poor or good, following physical trauma. Of those that have, psychosocial variables such as anxiety, depression and post-traumatic stress, have so far been identified as the strongest predictors of outcome.<sup>4-7</sup> However, only a limited number of variables have hitherto been evaluated as potential predictive factors. Indeed, current opinion regarding pain mechanisms<sup>8</sup> suggests that the development of chronic pain and disability cannot be entirely attributable to psychosocial factors. This is consistent with research in primary care that has identified predictive factors for poor outcome across a range of musculoskeletal pain conditions<sup>9</sup>, which include: widespread pain, high functional disability, high pain intensity, long pain duration,

1  
2  
3 high depression/anxiety, presence of previous pain episodes, movement restriction, and poor  
4 coping strategies. Moreover, developments in the mechanistic understanding of pain<sup>10-12</sup>  
5 suggest that other measures [e.g. indicators of central sensitisation, inflammatory activity]  
6  
7 may have potential predictive utility, especially in an acute trauma population.  
8  
9  
10

### 11 12 13 **Aims of study**

14  
15  
16  
17  
18 Using a unique combination of: 1) general patient characteristics including premorbid  
19 neuropsychological status, 2) quality of life and physical functioning, 3) psychosocial  
20 features, 4) injury characteristics, 5) pain characteristics, 6) quantitative sensory testing, and  
21  
22 7) biomarkers; we aim to find a set of predictive factors to identify patients at risk of  
23  
24 developing ongoing post-traumatic pain and disability following acute musculoskeletal  
25  
26 trauma. This will subsequently inform the feasibility of developing and evaluating a new  
27  
28 clinical care pathway of precision rehabilitation that matches interventions to the predicted  
29  
30 risk of poor recovery.  
31  
32  
33  
34  
35  
36

### 37 **Objectives**

- 38  
39  
40  
41 1) Identify predictive factors for poor outcome [chronic pain and disability at 6-months post-  
42 injury] following acute musculoskeletal trauma.  
43  
44 2) Develop a predictive model to inform a screening tool to identify the predicted risk of poor  
45 recovery [transition from acute post-traumatic pain to chronic pain and disability].  
46  
47 3) Estimate the predictive performance of the screening tool through validation of the model  
48  
49  
50  
51 in a separate data set.  
52  
53  
54  
55  
56  
57  
58  
59  
60

1  
2  
3 4) Document the clinical course of symptoms at 3 and 12 months following acute  
4  
5 musculoskeletal trauma.  
6  
7

## 8 9 **METHODS AND ANALYSIS**

### 10 11 12 13 **Source of data**

14  
15  
16  
17  
18 The study will be a prospective, observational study of two temporally staggered  
19 cohorts of trauma patients, who are emergency department admissions into a Major Trauma  
20 Centre in the United Kingdom, with an episode inception defined as the traumatic event  
21 [Figure 1]. The first cohort will facilitate development of the prediction model to inform the  
22 screening tool, and the second will enable validation of the prediction model through  
23 evaluation of the predictive performance of the model and tool.<sup>13 14</sup> There will be an interval  
24 of at least 6 months between recruitment into the two respective cohorts. The prospective  
25 design enables control of unwarranted influences, and enables a stronger case for inferring  
26 causal relationships. The nature of the study necessitates predictive statistical modelling.<sup>15</sup>  
27  
28 This protocol is written in line with the TRIPOD statement,<sup>16</sup> in which recommendations are  
29 given for the reporting of prediction model development and validation.  
30  
31  
32  
33  
34  
35  
36  
37  
38  
39  
40  
41  
42  
43

44 Self-reported and physical assessment predictive data will be collected at baseline  
45 over a period of up to 14 days [or duration of inpatient stay if shorter], which will commence  
46 immediately following recruitment. Biomarker data collection will occur throughout the same  
47 baseline period, but can commence prior to recruitment providing assent is gained from a  
48 legal consultee. The outcome data will be collected at 6-months post-injury [working  
49 definition of chronic pain];<sup>17</sup> ; the point of evaluation of an individual's absolute risk of poor  
50  
51  
52  
53  
54  
55  
56  
57  
58  
59  
60

1  
2  
3 outcome [objectives 1, 2 and 3]. In addition, selected data will be measured at 3 and 12-  
4  
5 months post-injury to explore the clinical course of recovery following injury in the shorter  
6  
7 and longer term [objective 4].  
8  
9

## 10 11 **Figure 1. Study design**

12  
13  
14  
15 [Insert Figure 1 here].  
16  
17  
18  
19

## 20 **Participants**

21  
22  
23  
24 Participants will be recruited from the register of a Major Trauma Centre in the  
25  
26 United Kingdom for a period of up to 24 months [planned start date January 2018]. All  
27  
28 consecutive eligible patients will be approached for recruitment until the sample size is  
29  
30 achieved.  
31  
32  
33  
34

## 35 *Eligibility criteria*

36  
37  
38  
39 Inclusion criteria: Adult patients aged  $\geq 16$  years who are emergency department  
40  
41 admissions into the Major Trauma Centre, with their main criteria for admission being acute  
42  
43 musculoskeletal trauma within the preceding 14 days, and a capacity to use and understand  
44  
45 written and verbal English language and a mental capacity to provide informed consent [e.g.  
46  
47 no confusion, delirium, severe cognitive impairment, or severe mental illness, defined by a  
48  
49 score of 6 or less on the Abbreviated Mental Test]<sup>18</sup>. The primary reason for including  
50  
51 patients with trauma occurring up to 14 days previously is to be inclusive of patients who are  
52  
53 critically ill and/or with diminished mental capacity initially following their trauma, and  
54  
55  
56  
57  
58  
59  
60

1  
2  
3 patients requiring surgery as a result of the trauma; representative of the broad trauma  
4  
5 population.  
6  
7  
8  
9

10 Exclusion criteria: Exclusions will be made where the patient has an acute intra-  
11 cranial lesion [e.g. bleed] combined with a score of  $\leq 14$  on the Glasgow Coma Scale<sup>19</sup> [a 15-  
12 item measure of consciousness impairment with adequate reliability<sup>20</sup> that is routinely taken  
13 in trauma patients at hospital admission], where there is evident brain or central nervous  
14 system injury or impairment, long-term neuro-cognitive disorders [such as brain tumour,  
15 multiple sclerosis, Alzheimer's and Parkinson's diseases, etc.], comorbid cancer, the presence  
16 of an ongoing rheumatological condition, prolonged use of corticosteroids, or terminal illness  
17 with short life expectancy.  
18  
19  
20  
21  
22  
23  
24  
25  
26  
27  
28  
29

30 Withdrawals: Participants will be informed that they are free to withdraw from the  
31 study at any time, without needing to provide reason. In the event of death within 3 months of  
32 being recruited, participants will be automatically withdrawn from the study and the primary  
33 predictive analysis. Baseline data of all withdrawn participants will be kept and compared to  
34 those of retained participants to assess for any differences.  
35  
36  
37  
38  
39  
40  
41  
42  
43  
44  
45  
46

## 47 **Recruitment**

48 Based on feasibility data [site data from the Trauma Audit and Research Network], it  
49 is estimated that at least 1,000 eligible trauma patients will be approachable for recruitment  
50 over a 24-month period, and that 50% would be expected to consent to participation. A  
51 dedicated team of research nurses will be available to recruit patients 7 days per week [from  
52 0700 to 1930].  
53  
54  
55  
56  
57  
58  
59  
60

1  
2  
3  
4  
5 Because of impairments resulting from their injuries, some otherwise eligible patients  
6  
7 will lack the mental capacity to provide informed consent when first approached to enrol in  
8  
9 the study. Recruitment into the study will therefore be undertaken under the guidance and  
10  
11 provision of the [UK] Mental Capacity Act 2005 for research in emergency situations. If the  
12  
13 patient lacks sufficient capacity to consent, written assent for study participation will be  
14  
15 sought from a legal consultee to begin biomarker data collection [blood samples], with  
16  
17 informed consent for full recruitment [and subsequent data collection] being sought from the  
18  
19 patient only if, and when, they regain sufficient capacity to provide this. If the patient does  
20  
21 not regain capacity to provide consent within 14 days of their trauma, they will not be  
22  
23 recruited into the study, biomarker data collection will cease, and any blood samples already  
24  
25 collected will be destroyed before analysis.  
26  
27  
28  
29  
30

31 Once informed consent is gained and the participant recruited, following a minimum  
32  
33 1 hour lead time after the informed consent process [to reduce patient burden], members of  
34  
35 the research team will visit the patient at their bedside to collect baseline self-reported data  
36  
37 via questionnaires [Table 1]. On the next available working day following completion of the  
38  
39 questionnaires [again, to reduce patient burden], members of the study team will return to the  
40  
41 patient to conduct the first physical [quantitative sensory testing] assessment. At each visit, if  
42  
43 deemed necessary the capacity of the participant will be checked using an Abbreviated  
44  
45 Mental Test<sup>18</sup> [a score of 6 or lower is indicative of reduced capacity], and asked if they are  
46  
47 happy to proceed with data collection.  
48  
49  
50  
51

## 52 **Outcome**

53  
54  
55  
56  
57  
58  
59  
60

1  
2  
3 The outcome for the prediction model is an individual's absolute risk of poor outcome  
4 [chronic pain and disability] at 6 months post-injury. Outcome will be measured using the  
5 Chronic Pain Grade Scale [CPGS],<sup>21</sup> which combines pain intensity and pain-related  
6 disability over the preceding 6-months into a single measure of pain *severity*. The CPGS has  
7 previously been used to assess the severity of body-wide chronic pain in general population,<sup>22</sup>  
8 primary care<sup>23</sup> and post-trauma<sup>24</sup> populations. Each item of the CPGS relates to at least one of  
9 the three categories of the International Classification of Functioning, Disability and Health  
10 [ICF]<sup>25</sup>: impairment, activity limitations and restricted participation. Furthermore, all ICF  
11 categories are encompassed by the CPGS.<sup>26</sup> The CPGS is a unidimensional scale, with good  
12 internal consistency across different pain populations; Cronbach's alpha of 0.84 to 0.91 in  
13 back pain, 0.79 for headache, and 0.84 for temporomandibular pain.<sup>21 27</sup> With regards to  
14 construct validity, cross-sectional and longitudinal studies of general practice patients have  
15 shown high scores on the CPGS, indicating greater chronic pain, to be associated with higher  
16 rates of unemployment, greater pain impact scale scores, greater use of opioid analgesics and  
17 physician visits, depressed mood, and lower self-rated health status.<sup>21 27 28</sup> For convergent  
18 validity, the CPGS has been found to have good correlation with equivalent dimensions of  
19 the SF-36.<sup>27 28</sup> In terms of responsiveness, changes in score over time in patients with chronic  
20 musculoskeletal pain correlated significantly with changes in SF-36 scores.<sup>29</sup> The CPGS has  
21 also been shown to have good test-retest reliability in primary care patients with back pain  
22 [weighted kappa 0.81, 95% CI 0.65, 0.98].<sup>27</sup>

23  
24  
25  
26  
27  
28  
29  
30  
31  
32  
33  
34  
35  
36  
37  
38  
39  
40  
41  
42  
43  
44  
45  
46 Although pain persistence is not used in assigning pain grade, a measure of pain days  
47 in the prior 6-months is included in the CPGS.<sup>30</sup> The responses on the remaining 7-items are  
48 used for computing scores for the 3 subscales of the CPGS:<sup>21</sup> characteristic pain intensity,  
49 disability score, and disability points. The characteristic pain intensity score [range: 0-100] is  
50 obtained by calculating the mean of 3 pain intensity measurements: 'at the present time', the  
51  
52  
53  
54  
55  
56  
57  
58  
59  
60

1  
2  
3 ‘worst pain’ in the preceding 6 months, and the ‘average’ pain over the preceding 6 months.

4  
5 The disability score [range: 0-100] is obtained through the mean ratings of how much the  
6  
7 pain has interfered in performing activities of daily living, recreational, social and family  
8  
9 activities, and work [including housework] activities in the last 6-months. The disability  
10  
11 points are scored 0-3 and are derived from a combination of ranked categories of the number  
12  
13 of disability days [the number of days that the respondent was away from usual activities in  
14  
15 the preceding 6 months due to pain] and disability score. Based on these scores, the  
16  
17 participant’s chronic pain and disability status can then be classified into one of the 5 ordinal  
18  
19 categories of chronic pain severity:<sup>21</sup> no pain [Grade 0], low disability and low intensity pain  
20  
21 [Grade I], low disability and high intensity pain [Grade II], high disability and moderately  
22  
23 limiting intensity pain [Grade III], and high disability and severely limiting intensity pain  
24  
25 [Grade IV]. As in previous studies, poor outcome will be defined as Grade  $\geq$ II.<sup>23 31-34</sup>  
26  
27  
28  
29  
30

### 31 **Candidate predictors**

32  
33  
34  
35 Candidate predictors have been selected that are: [1] reliable and valid measures of  
36  
37 their domain, and [2] have a theoretical association with the development of chronic pain.  
38  
39 Both modifiable and non-modifiable candidate predictors are included. Candidate predictors  
40  
41 are summarised in Table 1, with further detail in Supplementary file S1. Table 1 details  
42  
43 important data that will be measured at 3, 6 and 12-months post-injury to explore the clinical  
44  
45 course of recovery following injury in the shorter and longer term. All data collection will be  
46  
47 standardised through protocols and clinical report forms.  
48  
49  
50  
51  
52

53 **Table 1: Summary of data collection at different assessment points**

| 54 <b>Domain / Candidate predictor</b> | 55 <b>Measure / data item</b> | 56 <b>Baseline</b><br><i>Commencing</i><br><i><math>\leq</math>14 days</i> | 57 <b>3 months</b><br><i>Clinical</i><br><i>course</i> | 58 <b>6 months</b><br><i>Outcome</i><br><i>assessment</i> | 59 <b>12 months</b><br><i>Clinical</i><br><i>course</i> |
|----------------------------------------|-------------------------------|----------------------------------------------------------------------------|--------------------------------------------------------|-----------------------------------------------------------|---------------------------------------------------------|
|----------------------------------------|-------------------------------|----------------------------------------------------------------------------|--------------------------------------------------------|-----------------------------------------------------------|---------------------------------------------------------|

|                                                                                      |                                                                                                                                                                | <i>post-trauma</i> |   | <i>point / clinical course</i> |   |
|--------------------------------------------------------------------------------------|----------------------------------------------------------------------------------------------------------------------------------------------------------------|--------------------|---|--------------------------------|---|
| <b>General patient characteristics including premorbid neuropsychological status</b> |                                                                                                                                                                |                    |   |                                |   |
| Age                                                                                  | In years                                                                                                                                                       | √                  |   |                                |   |
| Gender                                                                               | Female / male / other                                                                                                                                          | √                  |   |                                |   |
| Body Mass Index [BMI]                                                                | Calculated from height and weight measurements                                                                                                                 | √                  |   |                                |   |
| Education                                                                            | Highest educational level attained                                                                                                                             | √                  |   |                                |   |
| Employment status                                                                    | Full-time/ part-time / not working / retired / student<br>Employed / self-employed                                                                             | √                  | √ | √                              | √ |
| Circumstance of trauma                                                               | Military / civilian                                                                                                                                            | √                  |   |                                |   |
| Previous history of musculoskeletal pain and injury                                  | Patient history data from patient recollection and medical records                                                                                             | √                  |   |                                |   |
| Comorbidity of other health problems                                                 | Patient history data from patient recollection and medical records                                                                                             | √                  |   |                                |   |
| Premorbid physical health                                                            | Patient history data from patient recollection and medical records                                                                                             | √                  |   |                                |   |
| Premorbid psychological health                                                       | Patient history data from medical records and patient recollection [including non-somatic items from the Subjective Health Complaints Inventory] <sup>35</sup> | √                  |   |                                |   |
| Number of days in hospital                                                           | Intensive care / ward / total                                                                                                                                  | √                  |   |                                |   |
| <b>Quality of life and physical functioning</b>                                      |                                                                                                                                                                |                    |   |                                |   |
| General health                                                                       | 36-item Short Form Health Survey, version 2 [SF-36v2] <sup>36</sup>                                                                                            | √                  | √ | √                              | √ |
| Health-related quality of life                                                       | EuroQol EQ-5D-5L <sup>37</sup>                                                                                                                                 | √                  | √ | √                              | √ |
| Self-care and mobility during activities of daily living                             | Barthel Index of Activities of Daily Living, <sup>38</sup> collected from hospital data                                                                        | √                  |   |                                |   |
| Sleep quality                                                                        | 11-point [0-10] Numerical Rating Scales, relating to current pain, from 'best possible sleep' to 'worst possible sleep' <sup>39</sup>                          | √                  | √ | √                              | √ |
| Brain/CNS impairment                                                                 | Glasgow Coma Scale <sup>19</sup>                                                                                                                               | √                  |   |                                |   |
| <b>Psychosocial features</b>                                                         |                                                                                                                                                                |                    |   |                                |   |
| Anxiety and depression                                                               | Hospital Anxiety and Depression Scales [HADS] <sup>40</sup>                                                                                                    | √                  | √ | √                              | √ |
| Coping strategies applied during a painful experience                                | Coping Strategies Questionnaire-24 [CSQ-24] <sup>41</sup>                                                                                                      | √                  | √ | √                              | √ |
| Fear of movement or fear of injury or re-injury during movement                      | Tampa Scale of Kinesiophobia, 11-item [TSK-11] <sup>42</sup>                                                                                                   | √                  | √ | √                              | √ |
| Confidence in ability to perform activities despite pain                             | Pain Self-Efficacy Questionnaire <sup>43</sup>                                                                                                                 | √                  | √ | √                              | √ |
| Subjective post-traumatic distress                                                   | Impact of Event Scale revised [IES-R] <sup>44</sup>                                                                                                            | √                  | √ | √                              | √ |

| <b>Injury characteristics</b>                    |                                                                                                                                                                   |                |   |   |   |
|--------------------------------------------------|-------------------------------------------------------------------------------------------------------------------------------------------------------------------|----------------|---|---|---|
| Time of injury/incident                          | Hospital record data                                                                                                                                              | √              |   |   |   |
| Injury location                                  | Adapted pain drawings, based on hospital record data                                                                                                              | √              |   |   |   |
| Tissues damaged                                  | Based on imaging data and hospital records<br>Fractures<br>Penetrating / non-penetrating injury / both                                                            | √              |   |   |   |
| Surgery required                                 | Location and post-injury timing of surgery, based on hospital record data                                                                                         | √              |   |   |   |
| Assisted mechanical ventilation required         | Yes / no / duration                                                                                                                                               | √              |   |   |   |
| Severity of injury                               | Injury Severity Scale <sup>45</sup>                                                                                                                               | √              |   |   |   |
| <b>Pain characteristics</b>                      |                                                                                                                                                                   |                |   |   |   |
| Chronic pain severity                            | Chronic Pain Grade Scale <sup>21</sup>                                                                                                                            |                |   | √ | √ |
| Pain intensity                                   | 11-point [0-10] Numerical Rating Scale, relating to current pain, from 'no pain' to 'pain as bad as could be' [collected as part of the Chronic Pain Grade Scale] | √ <sup>1</sup> | √ | √ | √ |
| Pain medication intake [type, dosage and timing] | Medication Quantification Scale, <sup>46-48</sup> based on hospital record data                                                                                   | √ <sup>1</sup> |   |   |   |
| Pain location                                    | Pain drawing                                                                                                                                                      | √ <sup>1</sup> | √ | √ | √ |
| Pain extent                                      | Electronic pain drawing <sup>49</sup>                                                                                                                             | √ <sup>1</sup> |   |   |   |
| Self-reported features of neuropathic pain       | painDETECT questionnaire <sup>50</sup>                                                                                                                            | √ <sup>1</sup> | √ | √ | √ |
| <b>Quantitative sensory testing</b>              |                                                                                                                                                                   |                |   |   |   |
| Heat pain threshold                              | Evaluation of pain threshold using a heat stimulus                                                                                                                | √ <sup>1</sup> |   |   |   |
| Cold pain threshold                              | Evaluation of pain threshold using a cold stimulus                                                                                                                | √ <sup>1</sup> |   |   |   |
| Pressure pain threshold                          | Evaluation of pain threshold using a pressure stimulus                                                                                                            | √ <sup>1</sup> |   |   |   |
| Temporal summation                               | Evaluation of pain intensity in response to repetitive pressure stimuli                                                                                           | √ <sup>1</sup> |   |   |   |
| <b>Biomarkers</b>                                |                                                                                                                                                                   |                |   |   |   |
| C-reactive protein [CRP]                         | Serum levels of CRP, a broad indicator of inflammation [via blood analysis]                                                                                       | √ <sup>2</sup> |   |   |   |
| Cell-free DNA [cfDNA]                            | Plasma levels of cell-free [nuclear and mitochondrial] DNA, indicators of tissue damage [via blood analysis]                                                      | √ <sup>2</sup> |   |   |   |

<sup>1</sup> Measurements to be taken repeatedly throughout the baseline period, which will commence immediately following recruitment via informed consent [up to 14 days post-trauma] for a period of up to 14 days [i.e. until a maximum of 28 days post-trauma], whilst the participant is in hospital

<sup>2</sup> Measurements to be taken repeatedly throughout the baseline period, but may be commenced prior to this, subject to assent from a legal consultee

## Data handling

1  
2  
3  
4  
5 Blood samples will be collected through the clinical and research nurse teams, whilst  
6  
7 the participant is in the hospital, and either analysed immediately [C-reactive protein] or  
8  
9 securely stored for subsequent analysis [cell-free DNA]. Baseline self-reported  
10  
11 questionnaires, pain and injury drawings, and physical assessments will be collected by one  
12  
13 of three trained assessors from the study team. Inter-rater reliability studies [across 2  
14  
15 assessors] will first be conducted in both healthy and trauma populations to inform definitive  
16  
17 testing protocols. The order of physical assessment data collection will be randomly assigned  
18  
19 [using computerised randomisation software] according to the modality of testing and by site,  
20  
21 to prevent order effects. Follow-up self-reported questionnaires will be posted to participants  
22  
23 at their home addresses; with up to two postal reminders and a telephone call for non-  
24  
25 response. All questionnaires will be formatted so that data can be scanned or entered directly  
26  
27 into an electronic database. Following data entry, data will be checked by a second researcher  
28  
29 for completeness and accuracy. In addition, regular audits of data collection and storage will  
30  
31 be performed by an independent study management committee. Participant identifiable  
32  
33 information will be securely stored within the hospital, in line with current United Kingdom  
34  
35 data protection legislation, and only accessible by the site Principal Investigator and Research  
36  
37 Nurse team who will not be involved in data analysis. All outcome measure data will be  
38  
39 securely transferred within an anonymised database file to physically secure servers at the  
40  
41 University of Birmingham, and stored for a period of 10-years in line with Research  
42  
43 Governance procedures. Participants will receive usual care, and interventions received will  
44  
45 be recorded for descriptive analysis. Anonymised data will be analysed using IBM SPSS  
46  
47 Statistics.  
48  
49  
50  
51  
52  
53  
54

## 55 **Sample size**

56  
57  
58  
59  
60

1  
2  
3  
4  
5 In predictive modelling, a larger sample size enables lower bias and variance, and  
6 permits the prospective prediction of new observations.<sup>15</sup> The number of predictors will be  
7 reduced using exploratory factor analysis. This process will ensure that the sample size  
8 provides at least 10 cases per candidate predictor, to adequately power the final regression  
9 analysis.<sup>51 52</sup> Data will be collected for an estimated 300 participants per cohort [n=600 total]  
10 to allow for withdrawals [primarily expected deaths within the first 3 months] and losses to  
11 follow-up, so that final data are available for 250 participants per cohort [n=500 total].  
12  
13  
14  
15  
16  
17  
18  
19  
20  
21

### 22 **Statistical analysis methods and management of missing data**

23  
24  
25

26 For each cohort, potentially eligible patients, numbers examined for eligibility,  
27 confirmed eligible, recruited into the study, completing follow-up, and analysed will be  
28 reported in a flow diagram. Reasons for non-participation, exclusion, drop-outs and  
29 withdrawal [e.g. death] will be reported at each stage. Participant characteristics will be  
30 descriptively presented. For each variable of interest, the number of participants with  
31 missing data will be reported.  
32  
33  
34  
35  
36  
37  
38  
39  
40

41 For the first cohort to develop the predictive model, an initial exploratory data analysis stage  
42 will summarise the data.<sup>15</sup> Correlations between candidate predictive factors will be  
43 calculated at baseline. Outcome [CPGS] scores will be dichotomised into good and poor  
44 categories as described previously. Data reduction will use exploratory factor analysis to  
45 assess factor loading of candidate predictors [summary scores] on poor outcome at 6 months.  
46 This will enable the number of candidate predictors entered into the final model to be reduced  
47 to 25, which can be supported by the cohort sample of 250. This process reduces the risk of  
48  
49  
50  
51  
52  
53  
54  
55  
56  
57  
58  
59  
60

1  
2  
3 over-fitting the model and the risk of selecting the wrong variables due to correlation between  
4  
5 predictor variables [multicollinearity].<sup>53</sup>  
6  
7  
8  
9

10 Statistical modelling for prediction has been planned *a priori*. To explore the  
11 influence of each predictive factor on poor outcome at 6 months, a logistic multivariable  
12 regression model will be fitted to the dichotomised outcome scores to calculate low and high  
13 risk of poor outcome. Odds ratios for each candidate predictive factor will be reported,  
14 adjusted for other factors and account for clustering [e.g. level of injury severity]. If  
15 necessary, multiple imputation<sup>54</sup> will be used to deal with missing outcome data. The  
16 characteristics of those patients with and without 6-month data will also be compared, to  
17 inform whether patients with no 6-month data were missing at random. Reduced  
18 multivariable analyses will be considered if necessary [e.g. removing one of two candidate  
19 predictive factors that are highly correlated at baseline], to examine the robustness of the  
20 conclusions.  
21  
22  
23  
24  
25  
26  
27  
28  
29  
30  
31  
32  
33  
34  
35

### 36 **Risk groups and development of the predictive screening tool**

37  
38  
39

40 The predictive model will be used to develop a risk stratification tool to inform an  
41 individual's absolute risk of poor outcome. The stratification tool will inform clinical  
42 decision-making for precision rehabilitation. Items will be selected for the model if they are  
43 statistically significantly [ $p < 0.05$ ] associated with poor outcome in the logistic regression  
44 analysis, and those deemed clinically important to retain using expert opinion [regardless of  
45 statistical significance, study steering group] to improve face validity for clinicians and avoid  
46 over-fitting of the model.<sup>53</sup> The regression model with included predictive factors will be  
47 fitted to the data from the first of the two cohorts to obtain a final set of parameter estimates  
48  
49  
50  
51  
52  
53  
54  
55  
56  
57  
58  
59  
60

1  
2  
3 [i.e. alpha and beta terms], which will be used to form the model. An important requirement  
4 of the stratification tool is that it should be sufficiently brief to facilitate use in clinical  
5 practice. Thus, we will look to simplify the model where possible to facilitate its use, but  
6 without important reduction in its predictive ability in terms of calibration and discrimination.  
7 For example, if multi-item questionnaire scores are included in the model, then we will  
8 evaluate whether just one of the questionnaire items is sufficient. Ideally, this process will  
9 result in a full and simplified model.  
10  
11  
12  
13  
14  
15  
16  
17  
18  
19

### 20 **Development versus validation**

21  
22  
23  
24 For validation of the model, data from the second of the two cohorts will be compared  
25 to that of the first to enable analysis of the distribution of important variables; inclusive of  
26 demographic, predictor and outcome variables. The predictive performance of the screening  
27 tool [discrimination, calibration, and goodness of fit] will be assessed using data from the  
28 second cohort. Data in both cohorts will be consistent in terms of setting, eligibility criteria,  
29 outcome, and predictors.  
30  
31  
32  
33  
34  
35  
36  
37  
38

### 39 **DISCUSSION**

40  
41  
42  
43  
44 There is an urgent need for a robust predictive study to predict the transition from  
45 acute to chronic pain in a musculoskeletal trauma population. Using such a comprehensive  
46 array of outcome measures will allow the development and validation of a predictive tool to  
47 predict development of chronic and disabling pain, and begin the process of identifying  
48 appropriate and precision interventions.  
49  
50  
51  
52  
53  
54  
55  
56  
57  
58  
59  
60

1  
2  
3 The candidate predictors used in this study have been chosen to be as comprehensive  
4 as possible, based on current knowledge of pain science. Other candidate predictors were  
5 considered [e.g. microRNA biomarkers], but their mechanistic functions and temporal  
6 progression are not yet sufficiently clear to justify the expense of their inclusion. The  
7 combination of patient reported outcome measures, psychophysical testing and biomarkers  
8 that are included are designed to act as surrogates for the four primary mechanisms of pain:<sup>55</sup>  
9  
10  
11  
12  
13  
14  
15  
16  
17  
18  
19  
20  
21  
22  
23  
24  
25  
26  
27  
28  
29  
30  
31  
32  
33  
34  
35  
36  
37  
38  
39  
40  
41  
42  
43  
44  
45  
46  
47  
48  
49  
50  
51  
52  
53  
54  
55  
56  
57  
58  
59  
60  
<sup>56 8</sup> *nociceptive* [injury location, severity and characteristics], *neuropathic* [painDETECT tool  
and pain extent, *inflammatory* [biomarkers], and *nociplastic* [quantitative sensory testing,  
painDETECT and pain location and extent]. In addition, other patient-reported outcome  
measures [e.g. pain intensity, post-traumatic stress, anxiety and depression, coping, and pain  
self-efficacy] are included as the domains that they measure have been shown to influence  
prognosis for long-term outcomes in populations with pain in a range of locations.<sup>9 23 24</sup>

31  
32  
33  
34  
35  
36  
37  
38  
39  
40  
41  
42  
43  
44  
45  
46  
47  
48  
49  
50  
51  
52  
53  
54  
55  
56  
57  
58  
59  
60  
Rehabilitation is widely regarded as an important component of post-trauma  
healthcare;<sup>57</sup> however, the current position of equipoise means that precision rehabilitation  
has not yet been identified. Understanding mechanisms that underlie the transition from acute  
to chronic pain is essential to moving beyond this position. Identifying predictive factors  
related to poor outcome of pain and disability outcome will facilitate targeting of effective  
interventions. This will inform rehabilitation decision making, and facilitate improvements in  
clinical and cost effectiveness of rehabilitation interventions.

48  
49  
50  
51  
52  
53  
54  
55  
56  
57  
58  
59  
60  
Limited research has identified criteria for quality in a predictive model, but authors  
have identified potential quality issues to ensure methodological rigour.<sup>58</sup> These issues are  
summarised in Table 2 and incorporated into the study design to ensure low risk of bias in  
development and validation of the predictive model.

**Table 2: Methodological decisions to improve study quality**

| <b>Criteria</b> <sup>58</sup>                                | <b>Methodological decisions to improve quality</b>                                                                                                                                                                                             |
|--------------------------------------------------------------|------------------------------------------------------------------------------------------------------------------------------------------------------------------------------------------------------------------------------------------------|
| <b>Study design</b>                                          |                                                                                                                                                                                                                                                |
| Inception cohort                                             | <ul style="list-style-type: none"> <li>• Clear description of population</li> <li>• Clear description of the participants at baseline</li> </ul>                                                                                               |
| Source population                                            | <ul style="list-style-type: none"> <li>• Clear description of population</li> <li>• Clear description of sampling frame and recruitment [method and timing]</li> </ul>                                                                         |
| Inclusion and exclusion criteria                             | <ul style="list-style-type: none"> <li>• Clarity of eligibility criteria</li> </ul>                                                                                                                                                            |
| Prospective design                                           | <ul style="list-style-type: none"> <li>• Clarity of study design</li> </ul>                                                                                                                                                                    |
| <b>Study attrition</b>                                       |                                                                                                                                                                                                                                                |
| Number of drop-outs                                          | <ul style="list-style-type: none"> <li>• Adequate participation rate</li> <li>• Clear description of attempts to collect information on participants who dropped out</li> <li>• Reporting numbers and reasons for loss to follow-up</li> </ul> |
| Information provided on method of management of missing data | <ul style="list-style-type: none"> <li>• Appropriate methods of imputation of missing data</li> </ul>                                                                                                                                          |
| <b>Predictive factors</b>                                    |                                                                                                                                                                                                                                                |
| All predictive factors described used to develop the model   | <ul style="list-style-type: none"> <li>• Clear definition of predictive factors</li> <li>• An adequate proportion of participants has complete data for the predictive factor</li> </ul>                                                       |
| Standardised or valid measurements                           | <ul style="list-style-type: none"> <li>• The measurement of the predictive factor is reliable and valid</li> <li>• The measurement of the predictive factor is the same for all participants</li> </ul>                                        |
| Linearity assumption studied                                 | <ul style="list-style-type: none"> <li>• Linearity of data will be reported</li> </ul>                                                                                                                                                         |
| No dichotomization of predictive variables                   | <ul style="list-style-type: none"> <li>• Continuous variables will be reported where possible</li> </ul>                                                                                                                                       |
| Data presentation all predictive factors                     | <ul style="list-style-type: none"> <li>• Complete data will be presented</li> </ul>                                                                                                                                                            |
| <b>Outcome measures</b>                                      |                                                                                                                                                                                                                                                |
| Description of outcome measures                              | <ul style="list-style-type: none"> <li>• The outcome is clearly defined</li> </ul>                                                                                                                                                             |
| Standardised or valid measurements                           | <ul style="list-style-type: none"> <li>• The measurement of the outcome is reliable and valid</li> <li>• The measurement of the outcome is the same for all participants</li> </ul>                                                            |
| Data presentation of most important outcome measures         | <ul style="list-style-type: none"> <li>• Complete data will be presented</li> </ul>                                                                                                                                                            |
| <b>Analysis</b>                                              |                                                                                                                                                                                                                                                |
| Presentation of univariate crude estimates                   | <ul style="list-style-type: none"> <li>• An appropriate strategy for model building is described</li> <li>• An adequate statistical model described</li> </ul>                                                                                 |
| Sufficient numbers of subjects per variable                  | <ul style="list-style-type: none"> <li>• Adequate data will be presented</li> </ul>                                                                                                                                                            |
| Selection method of variables explained                      | <ul style="list-style-type: none"> <li>• Sufficient data will be presented to enable assessment of the adequacy of the analytic strategy</li> </ul>                                                                                            |

|                                        |                                                                                                                                                                |
|----------------------------------------|----------------------------------------------------------------------------------------------------------------------------------------------------------------|
|                                        | <ul style="list-style-type: none"> <li>• All results will be reported</li> </ul>                                                                               |
| Presentation of multivariate estimates | <ul style="list-style-type: none"> <li>• An appropriate strategy for model building is described</li> <li>• An adequate statistical model described</li> </ul> |
| <b>Clinical performance / validity</b> |                                                                                                                                                                |
| Clinical performance                   | <ul style="list-style-type: none"> <li>• Clinical performance of the model will be reported</li> </ul>                                                         |
| Internal validation                    | <ul style="list-style-type: none"> <li>• Internal validation will be reported</li> </ul>                                                                       |
| External validation                    | Not a focus of this study                                                                                                                                      |

## ETHICS AND DISSEMINATION

Ethical approval will be obtained from the NHS Research Ethics Committee, and institutional R&D approval will also be obtained.

### Patient burden and potential distress

The primary ethical concern is to limit distress on participants. As such, to reduce the patient burden when collecting baseline data, the self-reported questionnaires will be administered by members of the study team shortly following obtaining fully informed consent, and physical assessment outcomes will be measured at least 24 hours later. Patients will be asked to consent to not only providing new data for the study, but also for the study team to access information that will have been routinely collected by the hospital staff since the time of admission [e.g. nature and circumstances of injury, previous medical history, medication details, blood test results]. This will be fully explained to patients and explicitly detailed in the participant information sheet.

### Mental capacity

1  
2  
3 Because of the nature of their injuries, the patient's mental capacity will be assessed  
4 on admission into hospital and thereafter by clinical staff and/or research nurses. The mental  
5 capacity of eligible patients at the time of being approached for recruitment will therefore fall  
6 into one of two groups: either they possess or are lacking mental capacity [in accordance with  
7 the Mental Capacity Act 2005] to provide informed consent to voluntarily participate in the  
8 study.  
9  
10  
11  
12  
13  
14  
15  
16  
17

18 For patients possessing mental capacity to provide consent, a research nurse or  
19 member of the research team will ask if they are interested in participating in the study. If  
20 they are interested, a copy of the participant information sheet will be provided [and if  
21 necessary read to them] to give them an outline of the study. Following an opportunity to  
22 seek additional information and ask questions, the patient will be asked if they wish to  
23 provide their written informed consent to participate in the study, at which point a consent  
24 form will need to be signed.  
25  
26  
27  
28  
29  
30  
31  
32  
33  
34

35 On admission to the hospital, an otherwise eligible patient may lack the mental  
36 capacity to decide whether to provide consent to participate in a research study [e.g. due to  
37 the severity of their injuries, because they are arriving intubated and ventilated, or as a side-  
38 effect of medication for their injuries]. They may or may not regain this capacity during their  
39 stay in the hospital. Due to our wish to begin measuring biomarkers as early as possible  
40 following the onset of trauma, for some otherwise eligible patients it would be necessary to  
41 take blood samples before the patient has regained the capacity to provide informed consent.  
42 Using the convention of previous studies in trauma populations,<sup>59</sup> recruitment into the study  
43 will be undertaken under the provision and guidance of the Mental Capacity Act 2005 for  
44 research in emergency situations, and in accordance with the Declaration of Helsinki. As  
45  
46  
47  
48  
49  
50  
51  
52  
53  
54  
55  
56  
57  
58  
59  
60

1  
2  
3 such, if a patient does not possess this capacity when first approached for recruitment, the  
4  
5 research team will request a mandate to collect blood samples from a legal consultee. This  
6  
7 mandate can continue until the patient gains sufficient capacity to make an informed decision  
8  
9 as to whether they wish to provide consent or not. We will use this mandate up to 14 days  
10  
11 from the date of the trauma. If the patient does not regain capacity within 14 days following  
12  
13 the trauma, or if informed consent is not provided by the patient once capacity to do so is  
14  
15 regained, any samples collected will be destroyed before any non-clinical biomarker analysis  
16  
17 [i.e. cell-free DNA] is performed. Furthermore, only once informed consent has been gained  
18  
19 from the patient would the research team proceed to collect any self-reported questionnaire or  
20  
21 physical assessment data. The legal consultee can either be a 'personal consultee' e.g. family  
22  
23 member, or a 'nominated consultee' e.g. intensive care consultant. Once a consultee [personal  
24  
25 or nominated] has been identified, they will be provided with the participant information  
26  
27 sheet, to inform them about the study. The consultee will be asked if they feel participating in  
28  
29 the study would be something to which the patient would agree or object to. If, in their  
30  
31 opinion, the patient would agree to participating in the study, the consultee will be asked to  
32  
33 sign a declaration form, and the research team can begin the schedule of blood sample  
34  
35 collections. If, at any time prior to the patient regaining capacity, the consultee decides to  
36  
37 withdraw assent, then no further samples will be collected until the patient can be approached  
38  
39 for formal recruitment [if appropriate].  
40  
41  
42  
43  
44  
45

#### 46 Other ethical issues

47  
48  
49

50 Participants will be informed that they are free to withdraw from the study at any  
51  
52 time, without needing to provide reason. At each data collection visit, the capacity of the  
53  
54 participant will be checked [using an Abbreviated Mental Test] and asked if they are happy to  
55  
56  
57  
58  
59  
60

1  
2  
3 proceed with data collection. Any concerns for a participant by the study team will be fed  
4  
5 back to clinical staff. All blood samples will be collected by hospital staff and the research  
6  
7 nurse team and will be stored, tested and disposed of in accordance with current United  
8  
9 Kingdom guidelines and regulations. In the event of death within 3 months of being recruited,  
10  
11 participants will be automatically withdrawn from the study and the primary predictive  
12  
13 analysis. Baseline characteristics of withdrawn participants will be compared to those of  
14  
15 retained participants to assess for any differences.  
16  
17  
18  
19  
20  
21  
22  
23  
24  
25  
26  
27  
28  
29  
30  
31  
32  
33  
34  
35  
36  
37  
38  
39  
40  
41  
42  
43  
44  
45  
46  
47  
48  
49  
50  
51  
52  
53  
54  
55  
56  
57  
58  
59  
60

Or peer review only

## REFERENCES

1. Berben SA, Schoonhoven L, Meijs TH, et al. Prevalence and relief of pain in trauma patients in emergency medical services. *Clin J Pain* 2011;27(7):587-92. doi: 10.1097/AJP.0b013e3182169036
2. Williamson OD, Epi GD, Gabbe BJ, et al. Predictors of moderate or severe pain 6 months after orthopaedic injury: a prospective cohort study. *J Orthop Trauma* 2009;23(2):139-44. doi: 10.1097/BOT.0b013e3181962e29
3. Mannion RJ, Woolf CJ. Pain mechanisms and management: a central perspective. *Clin J Pain* 2000;16(3 Suppl):S144-56.
4. Holbrook TL, Anderson JP, Sieber WJ, et al. Outcome after major trauma: discharge and 6-month follow-up results from the Trauma Recovery Project. *J Trauma* 1998;45(2):315-23; discussion 23-4.
5. Holbrook TL, Anderson JP, Sieber WJ, et al. Outcome after major trauma: 12-month and 18-month follow-up results from the Trauma Recovery Project. *J Trauma* 1999;46(5):765-71; discussion 71-3.
6. Harris IA, Young JM, Rae H, et al. Predictors of general health after major trauma. *J Trauma* 2008;64(4):969-74. doi: 10.1097/01.ta.0000245972.83948.1a
7. Ponsford J, Hill B, Karamitsios M, et al. Factors influencing outcome after orthopedic trauma. *J Trauma* 2008;64(4):1001-9. doi: 10.1097/TA.0b013e31809fec16
8. Vardeh D, Mannion RJ, Woolf CJ. Toward a Mechanism-Based Approach to Pain Diagnosis. *J Pain* 2016;17(9 Suppl):T50-69. doi: 10.1016/j.jpain.2016.03.001
9. Artus M, Campbell P, Mallen CD, et al. Generic prognostic factors for musculoskeletal pain in primary care: a systematic review. *BMJ Open* 2017;7(1):e012901. doi: 10.1136/bmjopen-2016-012901
10. Latremoliere A, Woolf CJ. Central sensitization: a generator of pain hypersensitivity by central neural plasticity. *J Pain* 2009;10(9):895-926. doi: 10.1016/j.jpain.2009.06.012
11. Linley JE, Rose K, Ooi L, et al. Understanding inflammatory pain: ion channels contributing to acute and chronic nociception. *Pflugers Arch* 2010;459(5):657-69. doi: 10.1007/s00424-010-0784-6
12. Woolf CJ. Central sensitization: implications for the diagnosis and treatment of pain. *Pain* 2011;152(3):S2-15.
13. Altman DG, Vergouwe Y, Royston P, et al. Prognosis and prognostic research: validating a prognostic model. *BMJ* 2009;338(338):b605. doi: 10.1136/bmj.b605
14. Moons KG, Kengne AP, Grobbee DE, et al. Risk prediction models: II. External validation, model updating, and impact assessment. *Heart* 2012;98(9):691-8. doi: 10.1136/heartjnl-2011-301247
15. Shmueli G. To explain or to predict? *Statistical Science* 2010;25(3):289-310.
16. Collins GS, Reitsma, J.B., Altman, D.G. and Moons, K.G., . Transparent reporting of a multivariable prediction model for individual prognosis or diagnosis (TRIPOD): the TRIPOD statement. *BMC Medicine* 2015;13(1)
17. Merskey H Bogduk N. Classification of chronic pain : descriptions of chronic pain syndromes and definitions of pain terms. USA: IASP Press 1994.
18. Hodgkinson HM. Evaluation of a mental test score for assessment of mental impairment in the elderly. *Age and Ageing* 1972;1(4):233-8.
19. Teasdale G, Jennett B. Assessment of coma and impaired consciousness. A practical scale. *Lancet* 1974;2(7872):81-4.
20. Reith FC, Van den Brande R, Synnot A, et al. The reliability of the Glasgow Coma Scale: a systematic review. *Intensive Care Med* 2016;42(1):3-15. doi: 10.1007/s00134-015-4124-3

- 1
- 2
- 3 21. Von Korff M, Ormel J, Keefe FJ, et al. Grading the severity of chronic pain. *Pain* 1992;50(2):133-
- 4 49.
- 5 22. Parsons S, Breen A, Foster NE, et al. Prevalence and comparative troublesomeness by age of
- 6 musculoskeletal pain in different body locations. *Fam Pract* 2007;24(4):308-16. doi:
- 7 10.1093/fampra/cmm027
- 8 23. Muller S, Thomas E, Dunn KM, et al. A prognostic approach to defining chronic pain across a
- 9 range of musculoskeletal pain sites. *Clin J Pain* 2013;29(5):411-6. doi:
- 10 10.1097/AJP.0b013e318257099e
- 11 24. Rivara FP, Mackenzie EJ, Jurkovich GJ, et al. Prevalence of pain in patients 1 year after major
- 12 trauma. *Arch Surg* 2008;143(3):282-7; discussion 88. doi: 10.1001/archsurg.2007.61
- 13 25. Organization WH. The International Classification of Functioning, Disability and Health (ICF).
- 14 Geneva: WHO 2001.
- 15 26. Dixon D PD, Johnston M. What does the chronic pain grade questionnaire measure? *Pain*
- 16 2007;130:249-53.
- 17 27. Smith BH, Penny KI, Purves AM, et al. The Chronic Pain Grade questionnaire: validation and
- 18 reliability in postal research. *Pain* 1997;71(2):141-7.
- 19 28. Penny KI PA, Smith BH, Chambers WA, Smith WC. Relationship between the chronic pain grade
- 20 and measures of physical, social and psychological well-being. *pain* 1999;79:275-9.
- 21 29. Elliott AM SB, Smith WC, Chambers WA. Changes in chronic pain severity over time: The Chronic
- 22 Pain Grade as a valid measure. *Pain* 2000;88:303.
- 23 30. Von Korff M, Jensen MP, Karoly P. Assessing global pain severity by self-report in clinical and
- 24 health services research. *Spine (Phila Pa 1976)* 2000;25(24):3140-51.
- 25 31. Von Korff M, Miglioretti DL. A prognostic approach to defining chronic pain. *Pain*
- 26 2005;117(3):304-13. doi: 10.1016/j.pain.2005.06.017
- 27 32. Von Korff M, Dunn KM. Chronic pain reconsidered. *Pain* 2008;138(2):267-76. doi:
- 28 10.1016/j.pain.2007.12.010
- 29 33. Dunn KM, Croft PR, Main CJ, et al. A prognostic approach to defining chronic pain: replication in a
- 30 UK primary care low back pain population. *Pain* 2008;135(1-2):48-54. doi:
- 31 10.1016/j.pain.2007.05.001
- 32 34. Thomas E, Dunn KM, Mallen C, et al. A prognostic approach to defining chronic pain: application
- 33 to knee pain in older adults. *Pain* 2008;139(2):389-97. doi: 10.1016/j.pain.2008.05.010
- 34 35. Eriksen HR, Ihlebaek C, Ursin H. A scoring system for subjective health complaints (SHC). *Scand J*
- 35 *Public Health* 1999;27(1):63-72.
- 36 36. Ware J. SF-36 Health Survey Updated. *Spine* 2000;25(24):3130-39.
- 37 37. Brooks R. EuroQol: the current state of play. *Health Policy* 1996;37(1):53-72.
- 38 38. Mahoney FI, Barthel DW. Functional Evaluation: The Barthel Index. *Md State Med J* 1965;14:61-5.
- 39 39. Cappelleri JC BA, McDermott AM, Sadosky AB, Petrie CD, Martin S. Psychometric properties of a
- 40 single-item scale to assess sleep quality among individuals with fibromyalgia. *Health Qual*
- 41 *Life Outcomes* 2009;17(7):54.
- 42 40. Zigmond AS, Snaith RP. The hospital anxiety and depression scale. *Acta Psychiatr Scand*
- 43 1983;67(6):361-70.
- 44 41. Harland NJ Georgieff K. Development of the coping strategies questionnaire 24, a clinically
- 45 utilitarian version of the coping strategies questionnaire. *Rehabilitation Psychology*
- 46 2003;48(4):296-300.
- 47 42. Woby SR, Roach NK, Urmston M, et al. Psychometric properties of the TSK-11: a shortened
- 48 version of the Tampa Scale for Kinesiophobia. *Pain* 2005;117(1-2):137-44. doi:
- 49 10.1016/j.pain.2005.05.029
- 50 43. Nicholas MK. The pain self-efficacy questionnaire: Taking pain into account. *Eur J Pain*
- 51 2007;11(2):153-63.
- 52
- 53
- 54
- 55
- 56
- 57
- 58
- 59
- 60

- 1  
2  
3 44. Beck JG, Grant DM, Read JP, et al. The impact of event scale-revised: psychometric properties in  
4 a sample of motor vehicle accident survivors. *J Anxiety Disord* 2008;22(2):187-98. doi:  
5 10.1016/j.janxdis.2007.02.007
- 6 45. Baker SP, O'Neill B, Haddon W, Jr., et al. The injury severity score: a method for describing  
7 patients with multiple injuries and evaluating emergency care. *J Trauma* 1974;14(3):187-96.
- 8 46. Masters Steedman S, Middaugh SJ, Kee WG, et al. Chronic-pain medications: equivalence levels  
9 and method of quantifying usage. *Clin J Pain* 1992;8(3):204-14.
- 10 47. Harden RN, Weinland SR, Remble TA, et al. Medication Quantification Scale Version III: update in  
11 medication classes and revised detriment weights by survey of American Pain Society  
12 Physicians. *J Pain* 2005;6(6):364-71. doi: 10.1016/j.jpain.2005.01.350
- 13 48. Gallizzi M GC, Harden RN, Stanos S, Khan A. Medication Quantification Scale Version III: internal  
14 validation of detriment weights using a chronic pain population. *Pain Pract* 2008;8(1):1-4.
- 15 49. Barbero M, Mores, F., Leoni, D., Gatti, R., Egloff, M., Falla, D. Test-retest reliability of pain extent  
16 and pain location using a novel method for pain drawing analysis. *European Journal of Pain*  
17 2015;19:1129-38.
- 18 50. Freynhagen R, Baron R, Gockel U, et al. painDETECT: a new screening questionnaire to identify  
19 neuropathic components in patients with back pain. *Curr Med Res Opin* 2006;22(10):1911-  
20 20. doi: 10.1185/030079906X132488
- 21 51. Peduzzi P, Concato J, Kemper E, et al. A simulation study of the number of events per variable in  
22 logistic regression analysis. *J Clin Epidemiol* 1996;49(12):1373-9.
- 23 52. Vittinghoff E, McCulloch CE. Relaxing the rule of ten events per variable in logistic and Cox  
24 regression. *Am J Epidemiol* 2007;165(6):710-8. doi: 10.1093/aje/kwk052
- 25 53. Sainani KL. Multivariate Regression: The Pitfalls of Automated Variable Selection. *Physical*  
26 *Medicine and Rehabilitation* 2013;5:791-94,.
- 27 54. Sterne JA, White IR, Carlin JB, et al. Multiple imputation for missing data in epidemiological and  
28 clinical research: potential and pitfalls. *BMJ* 2009;338:b2393. doi: 10.1136/bmj.b2393
- 29 55. Woolf CJ, Bennett GJ, Doherty M, et al. Towards a mechanism-based classification of pain? *Pain*  
30 1998;77(3):227-9.
- 31 56. Kosek E CM, Baron R, Gebhart GF, Mico JA, Rice AS, Rief W, Sluka AK. Do we need a third  
32 mechanistic descriptor for chronic pain states? *Pain* 2016;157(7):1382-6.
- 33 57. NICE. Rehabilitation after critical illness in adults Clinical guideline [CG83]. 2009
- 34 58. van Oort L, van den Berg T, Koes BW, et al. Preliminary state of development of prediction  
35 models for primary care physical therapy: a systematic review. *J Clin Epidemiol*  
36 2012;65(12):1257-66. doi: 10.1016/j.jclinepi.2012.05.007
- 37 59. Hazeldine J, Naumann DN, Toman E, et al. Prehospital immune responses and development of  
38 multiple organ dysfunction syndrome following traumatic injury: A prospective cohort study.  
39 *PLoS Med* 2017;14(7):e1002338. doi: 10.1371/journal.pmed.1002338
- 40  
41  
42  
43  
44

#### 45 **Authors' contributions**

46 DF is Chief Investigator and guarantor. DF and AR led protocol development are leading  
47 data analysis and dissemination. DE is the Research Fellow with responsibility for study  
48 management. NM is a Doctoral Researcher focused to this study. NH is the lead for Patient  
49 and Public Involvement. JP is the Principal Investigator at the Major Trauma Centre. JP and  
50  
51 CS are clinical representatives at the Major Trauma Centre. JL is the lead for biomarker  
52  
53  
54  
55  
56  
57

1  
2  
3 evaluation. All authors will contribute to data interpretation, conclusions, and dissemination.

4 AR drafted the initial manuscript with DF. Subsequent drafts were developed with DE. All

5  
6  
7 reviewers have read, contributed to, and agreed upon the final manuscript.  
8  
9

### 10 11 **Funding statement** 12

13  
14  
15 This work was supported by the National Institute for Health Research Surgical  
16  
17 Reconstruction and Microbiology Research Centre [NIHR SRMRC] to DF and AR.  
18  
19  
20

### 21 22 **Competing interests** 23

24 There are no competing interests.  
25  
26  
27

### 28 29 **Data sharing statement** 30

31 No additional data are available.  
32  
33  
34  
35  
36  
37  
38  
39  
40  
41  
42  
43  
44  
45  
46  
47  
48  
49  
50  
51  
52  
53  
54  
55  
56  
57  
58  
59  
60

1  
2  
3  
4  
5  
6  
7  
8  
9  
10  
11  
12  
13  
14  
15  
16  
17  
18  
19  
20  
21  
22  
23  
24  
25  
26  
27  
28  
29  
30  
31  
32  
33  
34  
35  
36  
37  
38  
39  
40  
41  
42  
43  
44  
45  
46  
47  
48  
49  
50  
51  
52  
53  
54  
55  
56  
57  
58  
59  
60



Study design

500x521mm (300 x 300 DPI)

## Supplementary file 1. Candidate predictors

### *General participant characteristics*

Several participant demographic features will be recorded at baseline, based on available hospital records and patient self-reported recollection, including smoking status, age, gender, height and weight to calculate body mass index [BMI], education [highest attained educational level], employment status [at the time of trauma], circumstance of trauma [military or civilian], previous history of musculoskeletal pain and injury, comorbidity of other current health problems.

### *Quality of life and physical functioning*

#### 36-Item Short Form Health Survey, Version 2.0 [SF-36v2]

The SF-36v2 is a self-reported measure of health-related quality of life, modified from the original SF-36, which was developed as part of the Medical Outcomes Study.<sup>1</sup> The 36-item questionnaire has subscales that assess physical function, social and psychological wellbeing.<sup>2 3</sup> The scores can be divided into physical and mental component summary scales.<sup>4</sup> The SF-36 has been shown to be valid and has been tested extensively in a trauma population.<sup>5</sup> Ware<sup>6</sup> reports multiple studies showing internal consistency above 0.70, with physical and mental scores exceeding 0.90. Minimal clinically important difference has been reported as 5.5 in a musculoskeletal trauma population.<sup>7</sup> Introduced in 1996, version 2.0 of the SF-36 is comparable to the original, retaining all subscales, with improvements to layout, presentation, response scales, wording and scoring.<sup>6</sup> The 'acute' [1 week recall period] version will be used, since the 4 week recall would not be appropriate for post-injury recall at baseline.

### EuroQol Five Dimension Scale, 5-level [EQ-5D-5L]

Health-related quality of life will be quantified using the EQ-5D-5L through which 243 possible health states are converted to a single index value of range 0 to 1 where 1 is perfect health, and a visual analogue scale range 0–100, representing ‘worst’ to ‘best’ imaginable health state, respectively.<sup>8</sup> The EQ-5D-5L, with each item having 5 possible responses, has improved inter-observer [ICC 2,1 0.57] and test-retest [ICC 2,1 0.69] reliability compared to the previous EQ-5D-3L.<sup>9</sup> In addition, it has less ceiling effects [20.8% reduction] and adequate convergent validity when compared with the WHO-5 [spearman rank 0.38-0.51].<sup>10</sup>

### Barthel Index of Activities of Daily Living

The Barthel Index of Activities of Daily Living is routinely collected by clinical staff at the hospital, and will be used to evaluate self-care and mobility during activities of daily living.<sup>11</sup> It is a 10-item ordinal scale encompassing a range of mobility physical activity tasks. Each item is related to a specific task and rated with a given number of points. A score of ‘0’ is given for least independence/function on that item and scores above that [1 or 2] are given for increasing independence/function [range: 0-20]. The amount of time and physical assistance required to perform each task are used in determining the assigned value of each item. A higher score is associated with a greater likelihood of being able to live at home with a degree of independence following discharge from hospital. With most measurement testing performed in the stroke population, the Barthel Index has demonstrated excellent internal consistency [0.89-0.90]<sup>13</sup> and is highly responsive in detecting changes<sup>14</sup> with a minimal detectable change of 4.02 and minimally clinically important difference of 1.85.<sup>15</sup> High correlations have been demonstrated with the Functional Independence Measure [FIM], indicating convergent validity of the instrument.<sup>16</sup>

### Subjective Health Complaints Inventory

Premorbid subjective health complaints will be assessed for the 6 months preceding the traumatic injury, using the single-item questions for non-somatic domains from the Subjective Health Complaints Inventory.<sup>17</sup> The Subjective Health Complaints Inventory has been shown to be a reliable measure of recording subjective health complaints for a 30 day recall period,<sup>17</sup> although psychometric properties have not been reported for an extended 6 month recall period.

### Sleep quality

Current sleep quality [over the previous 24 hour period] will be assessed using an 11-point Numerical Rating Scale [NRS], ranging from 0 [‘best possible sleep’] to 10 [‘worst possible sleep’]. This scale has been shown to possess moderate psychometric properties in fibromyalgia patients using a symptom diary.<sup>18</sup> We will aim to assess current pain intensity at baseline, as frequently as every 48-hours while the patient is in hospital up to a maximum of 14 days following recruitment [depending upon patient accessibility and assessor availability], to gain accurate average and rate-of-change data. In addition, we will use the 0-10 NRS to assess average sleep quality, related to the preceding 6-months at the 6 and 12-month assessment points, although no psychometric properties have previously been reported for this recall period.

### *Psychosocial features*

The predictive strength of psychosocial factors demonstrated in both primary care,<sup>19 20</sup> and post-trauma pain literature<sup>21-24</sup> demonstrates the importance of including these domains as candidate predictors.

### The Hospital Anxiety and Depression Scales [HADS]

The HADS will be used to measure depression and anxiety, and their role in the manifestation of somatic symptoms.<sup>25</sup> There are 7 items which produce a cumulative score [range 0–21] for the anxiety [HADS-A] and depression [HADS-D] subscales, with a higher score indicative of greater anxiety and depression.<sup>26</sup> HADS has been tested in multiple populations demonstrating adequate to excellent internal consistency of HADS-A [0.68-0.93] and HADS-D [0.67-0.90].<sup>26</sup> Standard measurement of error in a coronary heart disease population was identified as 1.37 and 1.44 for anxiety and depression scales respectively, and minimal detectable change as 3.80 and 3.99 respectively.<sup>27</sup> The HADS has also demonstrated excellent concurrent validity when compared to various other depression/anxiety scales.<sup>26</sup>

### Coping Strategies Questionnaire 24 [CSQ-24]

The CSQ-24 will be used to provide an indication of coping strategies used by participants when they are in pain.<sup>28</sup> Developed from items from the earlier, much larger Coping Strategies Questionnaire,<sup>29</sup> the CSQ-24 is a 23-item scale, composed of 4 subscales: *catastrophizing* [6 items], *diversion* [6 items], *reinterpreting* [6 items], and *cognitive coping* [5 items]. Participants are asked to indicate if they have particular thoughts and feelings when they are experiencing pain. A score on each item is summed to yield an aggregate score for each subscale, with a higher score reflecting greater attribution of that particular coping strategy. The CSQ-24 has demonstrated good internal consistency in populations with low back pain patients [Chronbach's alpha for the 4 factors ranged from 0.75 to 0.85] and work-related pain [0.80 to 0.86].<sup>30</sup> Harland & Georgieff<sup>28</sup> suggested that, since individuals may have a positive score on more than one subscale, the highest scoring subscale should be deemed the dominant coping strategy.<sup>28</sup> However, a recent study in a low back pain cohort,<sup>31</sup>

1  
2  
3 in which individual items from multiple questionnaires were factorised, suggested that  
4 *diversion, reinterpreting* and *cognitive coping* clustered together as a single factor,  
5  
6 *diversion, reinterpreting* and *cognitive coping* clustered together as a single factor,  
7  
8 representing coping cognitions. By contrast, *catastrophizing* clustered with pain-related  
9  
10 distress items.  
11  
12  
13

#### 14 Tampa Scale of Kinesiophobia [TSK-11]

15  
16  
17 The TSK-11 will be used to assess fear of movement or fear of injury or re-injury during  
18  
19 movement.<sup>32</sup> It is an 11-item questionnaire, eliminating psychometrically poor items from its  
20  
21 original 17-item version,<sup>33</sup> thus creating a shorter questionnaire with comparable internal  
22  
23 consistency and a 2-factor structure [activity avoidance and harm]. Each of the 11 items is  
24  
25 measured using a 4-point scale using the end points 1 [‘totally agree’] and 4 [‘totally  
26  
27 disagree’] [scoring range 11–44]. Higher scores indicate more fear-avoidance behaviour. The  
28  
29 TSK-11 has demonstrated acceptable to good internal consistency in acute and chronic  
30  
31 musculoskeletal pain populations.<sup>32 34</sup> Test-retest reliability has been reported as excellent  
32  
33 with a high standardised response mean; with good construct validity in relation to changes in  
34  
35 disability and pain.<sup>32</sup>  
36  
37  
38  
39  
40  
41

#### 42 Pain Self-Efficacy Questionnaire [PSEQ]

43  
44 The patient’s confidence in their ability to perform activities despite their pain will be  
45  
46 evaluated using the PSEQ. Developed from the Self-Efficacy Scale,<sup>35</sup> the PSEQ consists of  
47  
48 10 physical and psychosocial activity items measuring from 0 [‘not at all confident’] to 6  
49  
50 [‘completely confident’] thus generating a total score from 0-60.<sup>36</sup> The PSEQ has  
51  
52 demonstrated excellent internal consistency [0.92], internal reliability [0.93], and test-re-test  
53  
54 correlations [r=0.73] and has demonstrated validity when compared to other self-efficacy  
55  
56  
57  
58  
59  
60

1  
2  
3 measurements.<sup>36</sup> It has been used in several large population studies, for example Campbell  
4  
5 et al.<sup>31</sup>  
6  
7  
8  
9

### 10 Impact of Event Scale Revised [IES-R]

11  
12 The IES-R will be used to measure the subjective stress experienced by the participant  
13  
14 following their traumatic event. The IES-R is a 22-item tool [range: 0-88] that consists of 8  
15  
16 intrusion and 8 avoidance items that are derived from the original IES,<sup>37</sup> with an additional 7-  
17  
18 items assessing hyperarousal.<sup>38</sup> Accordingly, items correspond directly to symptoms of post-  
19  
20 traumatic stress disorder.<sup>38</sup> Respondents are asked to identify a specific stressful life event  
21  
22 and then indicate how much they were distressed or bothered during the past seven days by  
23  
24 each 'difficulty' listed. Each item is rated on a 5-point scale ranging from 0 ['not at all'] to 4  
25  
26 ['extremely']. The IES-R yields a total score ranging 0 to 88 and subscale scores can also be  
27  
28 calculated for the Intrusion, Avoidance, and Hyperarousal sub-scales. The IES-R has  
29  
30 demonstrated good internal consistency for all subscales [intrusion 0.87-0.94, avoidance  
31  
32 0.84-0.97, hyperarousal 0.79-0.91].<sup>39</sup> High correlations have been found between the IES-R  
33  
34 and the original scale, supporting the concurrent validity of both measures.<sup>38</sup>  
35  
36  
37  
38  
39  
40  
41  
42

### 43 *Injury characteristics*

44  
45 Several measures relating to the characteristics of the sustained injury will be taken at  
46  
47 baseline, since it is plausible that some of these should possess predictive value.<sup>40</sup> The time of  
48  
49 the injury will be gained from hospital records. The location of the injury/injuries will be  
50  
51 recorded using an adapted version of previously developed pain drawing software, via a  
52  
53 tablet computer.<sup>41</sup> Information relating to the tissues damaged from the injury [e.g. fractures  
54  
55 sustained, whether the injury was penetrating, non-penetrating or both, review of available  
56  
57 imaging data] will be gathered from hospital records, where possible. Whether the participant  
58  
59  
60

1  
2  
3 received surgery following their admission [where, for what and when], and whether the  
4  
5 participant received assisted mechanical ventilation will also be recorded.  
6  
7  
8  
9

### 10 11 Injury Severity Scale [ISS]

12  
13  
14  
15 The ISS will be retrospectively calculated for each participant, including those who  
16  
17 withdraw. The ISS is a numerical score with a range 0-75, that is used to describe the overall  
18  
19 severity of injury, and can be used for both multiple and single injuries. The score is  
20  
21 calculated, based on the Abbreviated Injury Scale [AIS] scores.<sup>42 43</sup> Higher ISS scores have  
22  
23 been associated with increased rates of mortality<sup>42 44 45</sup> and length/cost of hospital stay.<sup>46</sup> It is  
24  
25 the recommended tool for summarising injury severity by the Trauma Audit and Research  
26  
27 Network [TARN]. Both TARN and the National Institute for Clinical Excellence<sup>47</sup>  
28  
29 recommend any participant with a score of >8 to be referred for rehabilitation.  
30  
31  
32  
33  
34  
35  
36  
37  
38  
39  
40

### 36 *Pain characteristics*

41 Pain characteristics [e.g. pain intensity, multi-site pain] have long been reported to hold  
42  
43 predictive value for long-term pain across a variety of conditions.<sup>19-21 48 49</sup> It is therefore  
44  
45 sensible that we include these domains as candidate predictors for post-trauma pain.  
46  
47  
48  
49

### 50 Pain intensity

51  
52 Pain intensity will be measured using an 11-point [0-10] Numerical Rating Scale [NRS],  
53  
54 measuring current pain from 'no pain' to 'pain as bad as could be', from the Chronic Pain  
55  
56 Grade Scale.<sup>50</sup> We will aim to assess *current* pain intensity at baseline, as frequently as every  
57  
58 48-hours while the participant is in hospital [depending upon participant accessibility and  
59  
60

1  
2  
3 assessor availability], to gain accurate mean and rate-of-change data. At the 6 and 12 month  
4  
5 assessment points, *current* pain intensity, as well as *average* and *worst* pain intensity related  
6  
7 to the preceding 6 months, will be collected as part of the Chronic Pain Grade Scale. NRS  
8  
9 scales are sensitive, reliable and valid instruments for pain intensity measurement,<sup>51-54</sup> and  
10  
11 have been recommended for use in clinical populations in preference to visual analogue  
12  
13 scales or verbal rating scales.<sup>55</sup> A 30% change on a pain NRS score is considered clinically  
14  
15 meaningful.<sup>56-60</sup>

### 21 Pain medication

22  
23 The patient's pain medication [type, dosage and time since trauma] intake will be noted and  
24  
25 the Medication Quantification Score [MQS], which is a reliable and validated score for  
26  
27 quantifying analgesics, will be calculated to obtain a comparable metric for all different  
28  
29 analgesics.<sup>61-63</sup> It enables characterisation of analgesics when many different medications are  
30  
31 involved and doses are irregular. It will be calculated for each non-opioid and opioid, based  
32  
33 on weights assigned by medication class and dosage level [level 1 = sub-therapeutic dosage  
34  
35 and/or on demand, level 2 = lower 50% of the therapeutic dose range, level 3 = upper 50% of  
36  
37 the therapeutic dose range, level 4 = supra-therapeutic dose] using the 1998 detriment  
38  
39 weights.<sup>64</sup> The detriment weights are summed by the dosage level to provide the final score.  
40  
41 These scores will be summed to provide a quantitative index for analgesic usage suitable for  
42  
43 statistical analysis.  
44  
45  
46  
47  
48  
49

### 51 Pain drawing

52  
53 All participants will be requested to complete a pain drawing, indicating the spatial  
54  
55 distribution of their pain, over two body charts; one reporting a frontal view of the body and  
56  
57 one a dorsal view. We will also ask patients to mark their single 'most painful' site on one of  
58  
59  
60

1  
2  
3 these body charts. Pain drawing data will be collected using a custom software application on  
4 a tablet computer, and will be analysed with Matlab software, as described previously.<sup>41</sup> The  
5 software automatically calculates the number of shaded pixels from the pain drawing, which  
6 is defined as *pain extent*. Summaries of, and relationships between, pre-defined painful body  
7 regions will also be evaluated. Conventional pain drawing data will also be collected on  
8 paper follow-up questionnaires to assess painful body regions.  
9  
10  
11  
12  
13  
14  
15  
16  
17  
18

### 19 The painDETECT questionnaire

20  
21 It is assumed that all post-trauma patients will have significant nociception at baseline, but  
22 given the relatively high proportion of neuropathic pain following traumatic injury,<sup>65</sup> the  
23 contribution of other pain-related mechanistic pathways should also be assessed. The  
24 painDETECT questionnaire<sup>66</sup> will be used to facilitate the identification of neuropathic pain.  
25  
26 It consists of 9 items [7 evaluating pain quality, 1 evaluating pain pattern, and 1 evaluating  
27 pain radiation], all of which contribute to an aggregate score [range: -1-38]. This aggregate  
28 score can be divided into three classifications that represent the likelihood of neuropathic  
29 pain: ‘unlikely’ [0-12], ‘ambiguous’ [13–18] and ‘likely’ [19–38].<sup>66</sup> Although developed as a  
30 screening questionnaire for neuropathic pain, painDETECT may also function as a measure  
31 of characteristics that indicate augmented central pain processing.<sup>66</sup> The painDETECT  
32 questionnaire has demonstrated good internal consistency [0.76]<sup>67</sup> and excellent test-re-test  
33 reliability<sup>68</sup> within 1-hour of consultation [ICC{model not reported} 0.911] and 1-week post  
34 consultation [ICC{model not reported} 0.79].<sup>69</sup> Convergent validity has been demonstrated in  
35 comparison to pain severity,<sup>67 70</sup> health-related quality of life<sup>71</sup> and similar neuropathic pain  
36 screening tools.<sup>66</sup> As such, painDETECT outcomes will be measured at regular intervals  
37 while the participant is an inpatient in the hospital [subject to participant accessibility and  
38  
39  
40  
41  
42  
43  
44  
45  
46  
47  
48  
49  
50  
51  
52  
53  
54  
55  
56  
57  
58  
59  
60

1  
2  
3 assessor availability] to assess for emerging neuropathic pain and sensitization.

4  
5 Measurements will also be taken at all follow-up assessment points.  
6  
7  
8  
9

### 10 *Quantitative sensory testing [QST]*

11  
12  
13

14 QST methods will be used to assess pain sensibility, throughout which measurements will be  
15 concealed from participants. Owing to the clinical heterogeneity of the post-trauma  
16 population, precise standardisation of test sites between participants will not be possible.  
17 Instead, we have developed a standardised protocol that will be used to evaluate pain  
18 thresholds for multiple stimulus modalities [mechanical pressure, heat and cold] at the same  
19 sites in each participant. Each site where multi-modality pain threshold testing is performed  
20 will be within the receptive field of the same nerve root using described regions,<sup>72</sup> so that  
21 segmental cross-modality excitability may be compared. All pain thresholds will be measured  
22 at the same ‘local’ and ‘remote’ sites for each participant. We define local sites as being  
23 uninjured but within [or, if not accessible, as close as possible to] the same receptive field as  
24 the most painful injured tissue [e.g. skin over gastrocnemius in a participant with an ankle  
25 fracture]. By contrast, we define remote sites as a distant, accessible, site from the receptive  
26 fields in which tissues are injured [e.g. skin over tibialis anterior in a participant without  
27 lower limb injury], and on the contralateral side of the body where injured tissue is unilateral.  
28 Where possible, remote sites will be a mirror-image of the local site [to allow for comparison  
29 of absolute values], but in a trauma population we are aware that this may not always be  
30 possible. For all threshold testing modalities, an ascending method of limits design<sup>73</sup> will be  
31 used, whereby stimulus intensity will begin at a low level and gradually increase until the  
32 participant first perceives pain. Participants will be instructed to push a button or tell the  
33 assessor when the sensation has changed from one of the stimulus alone [e.g. just pressure] to  
34  
35  
36  
37  
38  
39  
40  
41  
42  
43  
44  
45  
46  
47  
48  
49  
50  
51  
52  
53  
54  
55  
56  
57  
58  
59  
60

1  
2  
3 a sensation of both the stimulus and pain [e.g. pressure and pain]. Following a brief  
4  
5 demonstration of equipment to familiarise participants, two consecutive assessments will be  
6  
7 performed for each modality at each site, and the means used for further analysis.<sup>74</sup> A  
8  
9 minimum of 30-seconds inter-stimulus interval will be given between each threshold  
10  
11 measurement within a single session. Measurements will be taken at baseline, while the  
12  
13 participant is an inpatient in the hospital; we will aim to collect data as frequently as every 48  
14  
15 hours to gain accurate rate-of-change data, but this will depend upon participant accessibility  
16  
17 and assessor availability. To ensure pain thresholds are consistently measured at the same  
18  
19 sites every session, sites will be labelled using a sterile, skin marking pen [Schuco Ltd, UK].  
20  
21 Because sites cannot be standardised between participants, the rates-of-change of these values  
22  
23 will be used as candidate predictive variables, to allow for comparisons between participants.  
24  
25 The order of pain threshold testing will be randomly assigned by modality at each session to  
26  
27 avoid order effects.  
28  
29  
30  
31  
32  
33  
34

35 Thermal [heat and cold] pain thresholds will be measured using skin-contact stimulation,  
36  
37 using the same thermode at the same sites, within specified local and remote dermatomes.  
38  
39 Thermal pain threshold assessments will be performed by delivering thermal stimuli directly  
40  
41 to the skin through a metal 30x30 mm Peltier thermode, using a TSA-II NeuroSensory  
42  
43 Analyzer thermal stimulator and accompanying software [Medoc Ltd, Israel]. To evaluate  
44  
45 heat pain threshold, temperature will be gradually increased, at a rate of 1°C/s from a  
46  
47 ‘neutral’ baseline of 32°C, to a maximum temperature of 50.5°C to avoid thermal injury.<sup>75</sup>  
48  
49 During each measurement, participants will be instructed to press a button when the stimulus  
50  
51 becomes painful, and this will be documented as the threshold value. Once pain threshold is  
52  
53 achieved [and recorded], the temperature will return to the baseline value at the same rate  
54  
55 [1°C/s]. For cold pain threshold measurements, the temperature will be gradually reduced, at  
56  
57  
58  
59  
60

1  
2  
3 a rate of 1°C/s from the baseline of 32°C, to a minimum temperature of 0°C,<sup>75</sup> before also  
4  
5 returning to baseline at a rate of 1°C/s.  
6  
7  
8  
9

10 Pressure pain thresholds will be measured using a digital pressure algometer [Series 7 force  
11 gauge, Mark-10 Corporation, USA], providing real-time force measurement and an analogue  
12 output that can be linked to a computer. Skin and muscle tissue are simultaneously stimulated  
13 during pressure threshold testing; sites will therefore be chosen where a dermatome and  
14 myotome are likely to share a common nerve root innervation [e.g. skin over tibialis  
15 anterior]. The algometer has a hard rubber circular contact tip of 1.2cm<sup>2</sup> area, with no sharp  
16 edges so to avoid an uneven pressure stimulus.<sup>76</sup> In order to preserve hygiene and attend to  
17 infection control measures in trauma patients, the contact tip will be covered with a clean,  
18 thin disposable covering. The tip will be applied perpendicular to the skin at a constant rate of  
19 pressure increase of 50kPa/s [6.0N/s using the 1.2cm<sup>2</sup> tip], until the first onset of pain. For  
20 each measurement, pressure will be unloaded immediately once the participant indicates that  
21 their pain threshold has been reached.<sup>74</sup>  
22  
23  
24  
25  
26  
27  
28  
29  
30  
31  
32  
33  
34  
35  
36  
37  
38  
39

40 To measure excitability of nociceptive pathways in response to mechanical stimuli, a series of  
41 repetitive, pressure stimulus 'pulses' will be applied via the digital algometer, with the aim of  
42 provoking temporal summation responses.<sup>77-79</sup> A minimum of 2 minutes after all threshold  
43 tests have been completed, a series of 10 consecutive pressure pulses will be applied at the  
44 remote and local sites [the order of site being randomly assigned]. The peak pressure reached  
45 during each pulse will be the mean pressure pain threshold that was measured for that  
46 particular site, as described previously. For each pulse, pressure will be gradually increased to  
47 the peak value over a period of 5 seconds, maintained at that peak value for 1 second, and  
48 then immediately released. A 5 second inter-stimulus interval will be used between pulses,  
49  
50  
51  
52  
53  
54  
55  
56  
57  
58  
59  
60

1  
2  
3 during which the tip of the algometer will remain in contact with the skin.<sup>78 79</sup> Pain intensity  
4 from the pulses will be rated on a numerical rating scale [0 being 'no pain' to 10 being 'pain  
5 as bad as could be']. In the event that participants indicate that pain has become intolerable,  
6 the sequence will be stopped immediately, and the NRS score and number of impulses  
7 performed at that point will be noted.  
8  
9  
10  
11  
12  
13  
14  
15  
16

### 17 *Biomarkers*

18  
19  
20  
21 Serum levels of C-reactive protein [CRP] will be used as a biomarker for inflammation; one  
22 of the primary mechanistic pathways that can evoke pain.<sup>80</sup> CRP is an acute-phase response  
23 protein produced by hepatocytes and is usually found in concentrations of 0.3 to 1.7 mg/l<sup>81</sup>.  
24 Increased production is due to cytokine-dependent induction of synthesis and elevated levels  
25 may be detected within eight hours of a stimulus and can reach 500 mg/l.<sup>28</sup> Besides  
26 trauma,<sup>82</sup> elevated levels of CRP may be seen in conditions such as autoimmune disease,  
27 infection and malignancy. It has also been associated with acute sciatica.<sup>83</sup> The level of CRP  
28 usually peaks within 48 hours of the stimulus. In contrast, when the stimulus for increased  
29 production completely ceases, the circulating CRP concentration falls rapidly, at almost the  
30 rate of plasma CRP clearance.<sup>84</sup> A fall in serial measurements usually indicates resolution of  
31 the underlying process, while persisting elevated levels indicates ongoing inflammation.<sup>85</sup>  
32  
33 Where possible, measurements of serum CRP will be repeatedly taken on a 48 hour schedule  
34 while the participant is an inpatient; absolute and rates of change of CRP values will be used  
35 as candidate predictive factors.<sup>86</sup>  
36  
37  
38  
39  
40  
41  
42  
43  
44  
45  
46  
47  
48  
49  
50  
51  
52  
53  
54  
55

56 Plasma cell-free DNA [cfDNA] will be used as an indicator of tissue damage. This includes  
57 both nuclear DNA [nDNA] and mitochondrial DNA [mtDNA], which circulate after being  
58  
59  
60

1  
2  
3 released from cells when they are damaged and are thought to be amongst the important  
4  
5 initiators of systemic inflammatory responses following tissue injury known as Damage  
6  
7 Associated Molecular Patterns [DAMPs].<sup>87</sup> Clinical outcomes in trauma patients have been  
8  
9 related to plasma mtDNA concentration.<sup>88 89</sup> Other work with severe trauma patients has  
10  
11 shown that cfDNA values rise to their peak value in the second week post-trauma, and then  
12  
13 gradually return to baseline values after approximately 2 months.<sup>90</sup> Where possible,  
14  
15 measurements of circulating cfDNA will be repeatedly taken on a 48 hour schedule while the  
16  
17 participant is an inpatient; absolute values and rates of change of cfDNA values will be used  
18  
19 as candidate predictive factors.  
20  
21  
22  
23  
24  
25  
26  
27  
28  
29  
30  
31  
32  
33  
34  
35  
36  
37  
38  
39  
40  
41  
42  
43  
44  
45  
46  
47  
48  
49  
50  
51  
52  
53  
54  
55  
56  
57  
58  
59  
60

## References

1. Stewart AL, Greenfield S, Hays RD, et al. Functional status and well-being of patients with chronic conditions. Results from the Medical Outcomes Study. *JAMA* 1989;262(7):907-13.
2. Ware JE, Jr., Sherbourne CD. The MOS 36-item short-form health survey (SF-36). I. Conceptual framework and item selection. *Med Care* 1992;30(6):473-83.
3. Hays RD, Sherbourne CD, Mazel RM. The RAND 36-Item Health Survey 1.0. *Health Econ* 1993;2(3):217-27.
4. McHorney CA, Ware JE, Jr., Raczek AE. The MOS 36-Item Short-Form Health Survey (SF-36): II. Psychometric and clinical tests of validity in measuring physical and mental health constructs. *Med Care* 1993;31(3):247-63.
5. Revell MP, Pynsent, P.B., Abudu, A., Fairbank, J.C.T. . Trauma Scores and Trauma Outcome Measures *Trauma* 2003;5:61-70.
6. Ware J. SF-36 Health Survey Updated. *Spine* 2000;25(24):3130-39.
7. Dattani R, Slobogean, G.P., O'Brien, P.J., Broekhuysse, H.M., Blachut, P.A., Guy, P., Lefavre, K.A. Psychometric Analysis of Measuring Functional Outcomes in Tibial Plateau Fractures using the Short Form (SF-36), Short Musculoskeletal Function Assessment (SMFA) and the Western Ontario McMaster Osteoarthritis (WOMAC) Questionnaires. *Injury Int J Care Injured* 2013;44:825-29.
8. Brooks R. EuroQol: the current state of play. *Health Policy* 1996;37(1):53-72.
9. Janssen MF, Birnie E, Haagsma JA, et al. Comparing the standard EQ-5D three-level system with a five-level version. *Value Health* 2008;11(2):275-84. doi: 10.1111/j.1524-4733.2007.00230.x
10. Janssen MF, Pickard AS, Golicki D, et al. Measurement properties of the EQ-5D-5L compared to the EQ-5D-3L across eight patient groups: a multi-country study. *Qual Life Res* 2013;22(7):1717-27. doi: 10.1007/s11136-012-0322-4
11. Mahoney FI, Barthel DW. Functional Evaluation: The Barthel Index. *Md State Med J* 1965;14:61-5.
12. Shah S, Vanclay F, Cooper B. Improving the sensitivity of the Barthel Index for stroke rehabilitation. *J Clin Epidemiol* 1989;42(8):703-9.
13. Hseuh IP, Lee, M.M., Hsieh, C.L. . Psychometric Characteristics of the Barthel Activities of Daily Living Index in Stroke Patients *J Formos Med Assoc* 2001;100(526-532)
14. Hseuh IP, Lin, J.H., Jeng, J.S., Hsieh, C.L. Comparison of the Psychometric Characteristics of the Functional Independence Measure, 5 Item Barthel Index and 10 Item Barthel Index in Patients with Stroke. *J Neurol Neurosurg Psychiatry* 2002;73:188-90.
15. Hsieh YW, Wang, C.H., Wu, S.C., Chen, P.C., Sheu, C.F., Hsieh, C.L. . Establishing the Minimally Clinically Important Difference of the Barthel Index in Stroke Patients. *Neurorehabilitation and Neural Repair* 2007;21(3):233-38.
16. Hobart JC, Thompson AJ. The five item Barthel index. *J Neurol Neurosurg Psychiatry* 2001;71(2):225-30.
17. Eriksen HR, Ihlebaek C, Ursin H. A scoring system for subjective health complaints (SHC). *Scand J Public Health* 1999;27(1):63-72.
18. Cappelleri JC BA, McDermott AM, Sadosky AB, Petrie CD, Martin S. Psychometric properties of a single-item scale to assess sleep quality among individuals with fibromyalgia. *Health Qual Life Outcomes* 2009;17(7):54.
19. Mallen CD, Peat G, Thomas E, et al. Prognostic factors for musculoskeletal pain in primary care: a systematic review. *Br J Gen Pract* 2007;57(541):655-61.
20. Artus M, Campbell P, Mallen CD, et al. Generic prognostic factors for musculoskeletal pain in primary care: a systematic review. *BMJ Open* 2017;7(1):e012901. doi: 10.1136/bmjopen-2016-012901

- 1
- 2
- 3
- 4 21. Clay FJ, Newstead SV, Watson WL, et al. Bio-psychosocial determinants of persistent pain 6
- 5 months after non-life-threatening acute orthopaedic trauma. *J Pain* 2010;11(5):420-30. doi:
- 6 10.1016/j.jpain.2009.12.002
- 7 22. Archer KR, Castillo RC, Wegener ST, et al. Pain and satisfaction in hospitalized trauma patients:
- 8 the importance of self-efficacy and psychological distress. *J Trauma Acute Care Surg*
- 9 2012;72(4):1068-77. doi: 10.1097/TA.0b013e3182452df5
- 10 23. Rosenbloom BN, Khan S, McCartney C, et al. Systematic review of persistent pain and
- 11 psychological outcomes following traumatic musculoskeletal injury. *J Pain Res* 2013;6:39-51.
- 12 doi: 10.2147/JPR.S38878
- 13 24. Vranceanu AM, Bachoura A, Weening A, et al. Psychological factors predict disability and pain
- 14 intensity after skeletal trauma. *J Bone Joint Surg Am* 2014;96(3):e20. doi:
- 15 10.2106/JBJS.L.00479
- 16 25. Zigmond AS, Snaith RP. The hospital anxiety and depression scale. *Acta Psychiatr Scand*
- 17 1983;67(6):361-70.
- 18 26. Bjelland I, Dahl AA, Haug TT, et al. The validity of the Hospital Anxiety and Depression Scale. An
- 19 updated literature review. *J Psychosom Res* 2002;52(2):69-77.
- 20 27. Wang W, Chair, S.Y., Thompson, D.R., Twinn, S.F. A Psychometric Evaluation of the Chinese
- 21 Version of the Hospital Anxiety and Depression Scale in Patients with Coronary Heart
- 22 Disease *Journal of Clinical Nursing* 2009;18:1908-15.
- 23 28. Harland NJ Georgieff K. Development of the coping strategies questionnaire 24, a clinically
- 24 utilitarian version of the coping strategies questionnaire. *Rehabilitation Psychology*
- 25 2003;48(4):296-300.
- 26 29. Rosenstiel AK KF. The use of coping strategies in chronic low back pain patients: Relationship to
- 27 patient characteristics and current adjustment. . *Pain* 1983;17: 33-44.
- 28 30. Chiu C JJ, Fujikawa M, Strand D, Cheing G, Lee G, Chan F Measurement Structure of the Coping
- 29 Strategies Questionnaire-24 in a Sample of Individuals with Musculoskeletal Pain: A
- 30 Confirmatory Factor Analysis. . *Rehabilitation Research, Policy, and Education* 2014;28(2):80-
- 31 90.
- 32 31. Campbell P, Foster NF, Thomas E, Dunn KM. Prognostic Indicators of Low Back Pain in Primary
- 33 Care: Five-Year Prospective Study. *J Pain* 2013;14(8):873-83.
- 34 32. Woby SR, Roach NK, Urmston M, et al. Psychometric properties of the TSK-11: a shortened
- 35 version of the Tampa Scale for Kinesiophobia. *Pain* 2005;117(1-2):137-44. doi:
- 36 10.1016/j.pain.2005.05.029
- 37 33. Miller RP KS, Todd D. The Tampa Scale: a measure of kinesiophobia. *Clin J Pain* 1991;7(1):51-52.
- 38 34. Swinkels-Meewisse EJCM, Swinkels RAHM, Verbeek ALM, Vlaeyen JWS. Psychometric Propertieis
- 39 of the Tampa Scale for Kinesiophobia and the Fear Avoidance Beliecs Questionnaire in Acute
- 40 Low Back Pain *Manual Therapy* 2003;8(1):29-36.
- 41 35. Kall LB. Psychological determinants of quality of life in patients with whiplash associated
- 42 disorders-a prospective study. *Disabil Rehabil* 2009;31(3):227-36. doi:
- 43 10.1080/09638280801912030
- 44 36. Nicholas MK. The pain self-efficacy questionnaire: Taking pain into account. *Eur J Pain*
- 45 2007;11(2):153-63.
- 46 37. Horowitz M, Wilner N, Alvarez W. Impact of Event Scale: a measure of subjective stress.
- 47 *Psychosom Med* 1979;41(3):209-18.
- 48 38. Beck JG, Grant DM, Read JP, et al. The impact of event scale-revised: psychometric properties in
- 49 a sample of motor vehicle accident survivors. *J Anxiety Disord* 2008;22(2):187-98. doi:
- 50 10.1016/j.janxdis.2007.02.007
- 51 39. Creamer M, Bell R, Failla S. Psychometric properties of the Impact of Event Scale - Revised. *Behav*
- 52 *Res Ther* 2003;41(12):1489-96.
- 53
- 54
- 55
- 56
- 57
- 58
- 59
- 60

- 1
- 2
- 3
- 4 40. Walker-Bone K HN, Ntani G, Tinati T, Jones GT, Smith BH, Macfarlane GJ, Cooper C. . Chronic
- 5 widespread bodily pain is increased among individuals with history of fracture: findings from
- 6 UK Biobank. . *Arch Osteoporos* 2016;11:1.
- 7 41. Barbero M, Mores, Leoni D, Gatti R, Egloff M, Falla D. Test-retest reliability of pain extent and
- 8 pain location using a novel method for pain drawing analysis. *European Journal of Pain*
- 9 2015;19:1129-38.
- 10 42. Baker SP, O'Neill B. The injury severity score: an update. *J Trauma* 1976;16(11):882-5.
- 11 43. Akmal M, Trivedi R, Sutcliffe J. Functional outcome in trauma patients with spinal injury. *Spine*
- 12 (*Phila Pa 1976*) 2003;28(2):180-5. doi: 10.1097/01.BRS.0000041577.12233.96
- 13 44. Baker SP, O'Neill B, Haddon W, Jr., et al. The injury severity score: a method for describing
- 14 patients with multiple injuries and evaluating emergency care. *J Trauma* 1974;14(3):187-96.
- 15 45. Linn S. The injury severity score--importance and uses. *Ann Epidemiol* 1995;5(6):440-6.
- 16 46. Sears JM, Blonar L, Bowman SM. Predicting work-related disability and medical cost outcomes: a
- 17 comparison of injury severity scoring methods. *Injury* 2014;45(1):16-22. doi:
- 18 10.1016/j.injury.2012.12.024
- 19 47. NICE. Low back pain and sciatica in over 16s: assessment and management, NICE guideline
- 20 [NG59]: National Institute for Health and Care Excellence, 2016.
- 21 48. Kamaleri Y, Natvig B, Ihlebaek CM, et al. Change in the number of musculoskeletal pain sites: A
- 22 14-year prospective study. *Pain* 2009;141(1-2):25-30. doi: 10.1016/j.pain.2008.09.013
- 23 49. Clay FJ, Watson WL, Newstead SV, et al. A systematic review of early prognostic factors for
- 24 persisting pain following acute orthopedic trauma. *Pain Res Manag* 2012;17(1):35-44.
- 25 50. Von Korff M, Ormel J, Keefe FJ, et al. Grading the severity of chronic pain. *Pain* 1992;50(2):133-
- 26 49.
- 27 51. Jensen MP, McFarland CA. Increasing the reliability and validity of pain intensity measurement in
- 28 chronic pain patients. *Pain* 1993;55(2):195-203.
- 29 52. Jensen MP, Turner, J.A. and Romano, J.M. . What is the maximum number of levels needed in
- 30 pain intensity measurement? . *Pain* 1994;58:387-92.
- 31 53. Jensen MP, Turner, L.R., Turner, J.A. and Romano, J.M. The use of multiple-item scales for pain
- 32 intensity measurement in chronic pain patients. *Pain* 1996;67:35-40.
- 33 54. Jensen MP, Turner JA, Romano JM, et al. Comparative reliability and validity of chronic pain
- 34 intensity measures. *Pain* 1999;83(2):157-62.
- 35 55. Von Korff M. Epidemiological and survey methods – assessment of chronic pain. In Turk, D.C. and
- 36 Melzack, R., editors, *Handbook of Pain Assessment*. . New York, USA: Guildford Press
- 37 2001:603-18.
- 38 56. Farrar JT, Young JP, Jr., LaMoreaux L, et al. Clinical importance of changes in chronic pain
- 39 intensity measured on an 11-point numerical pain rating scale. *Pain* 2001;94(2):149-58.
- 40 57. Salaffi F, Stancati A, Silvestri CA, et al. Minimal clinically important changes in chronic
- 41 musculoskeletal pain intensity measured on a numerical rating scale. *Eur J Pain*
- 42 2004;8(4):283-91. doi: 10.1016/j.ejpain.2003.09.004
- 43 58. Childs JD, Piva SR, Fritz JM. Responsiveness of the numeric pain rating scale in patients with low
- 44 back pain. *Spine (Phila Pa 1976)* 2005;30(11):1331-4.
- 45 59. Ostelo RW, Deyo RA, Stratford P, Waddell G, Croft P, Von Korff M, Bouter LM, Henrica C.
- 46 Interpreting change scores for pain and functional status in low back pain: towards
- 47 international consensus regarding minimal important change. *Spine* 2008;33(1):90-94.
- 48 60. Michener LA, Snyder AR, Leggin BG. Responsiveness of the numeric pain rating scale in patients
- 49 with shoulder pain and the effect of surgical status. *J Sport Rehabil* 2011;20(1):115-28.
- 50 61. Masters Steedman S, Middaugh SJ, Kee WG, et al. Chronic-pain medications: equivalence levels
- 51 and method of quantifying usage. *Clin J Pain* 1992;8(3):204-14.
- 52 62. Harden RN, Weiland SR, Remble TA, et al. Medication Quantification Scale Version III: update in
- 53 medication classes and revised detriment weights by survey of American Pain Society
- 54 Physicians. *J Pain* 2005;6(6):364-71. doi: 10.1016/j.jpain.2005.01.350
- 55
- 56
- 57
- 58
- 59
- 60

- 1  
2  
3 63. Gallizzi M GC, Harden RN, Stanos S, Khan A. Medication Quantification Scale Version III: internal  
4 validation of detriment weights using a chronic pain population. . *Pain Pract* 2008;8(1):1-4.  
5  
6 64. Stormo KJ, Kee WG, Steedham S, et al. Medication quantification scores and evaluation of  
7 patient pharmacology profiles. *Current Review of Pain* 1998;2(3):171–74.  
8  
9 65. Rosenbloom BN, Katz J, Chin KY, et al. Predicting pain outcomes after traumatic musculoskeletal  
10 injury. *Pain* 2016;157(8):1733-43. doi: 10.1097/j.pain.0000000000000580  
11  
12 66. Freynhagen R, Baron R, Gockel U, et al. painDETECT: a new screening questionnaire to identify  
13 neuropathic components in patients with back pain. *Curr Med Res Opin* 2006;22(10):1911-  
14 20. doi: 10.1185/030079906X132488  
15  
16 67. Cappelleri JC, Koduru V, Bienen EJ, et al. A cross-sectional study examining the psychometric  
17 properties of the painDETECT measure in neuropathic pain. *J Pain Res* 2015;8(8):159-67. doi:  
18 10.2147/JPR.S80046  
19  
20 68. Keller T, Freynhagen R, Tolle TR, et al. A retrospective analysis of the long-term test-retest  
21 stability of pain descriptors of the painDETECT questionnaire. *Curr Med Res Opin*  
22 2016;32(2):343-9. doi: 10.1185/03007995.2015.1125869  
23  
24 69. Tampin B, Bohne T, Callan M, et al. Reliability of the English version of the painDETECT  
25 questionnaire. *Curr Med Res Opin* 2017;33(4):741-48. doi: 10.1080/03007995.2017.1278682  
26  
27 70. Sadosky A, Koduru V, Bienen EJ, et al. Characterizing individual painDETECT symptoms by  
28 average pain severity. *Clinicoecon Outcomes Res* 2016;8:361-6. doi: 10.2147/CEOR.S105402  
29  
30 71. Cappelleri JC, Koduru V, Bienen EJ, et al. Mapping painDETECT, a neuropathic pain screening tool,  
31 to the EuroQol (EQ-5D-3L). *Qual Life Res* 2017;26(2):467-77. doi: 10.1007/s11136-016-1379-  
32 2  
33  
34 72. O'Brien M. Aids to the Examination of the Peripheral Nervous System, 5<sup>th</sup> Edition: Saunders  
35 (Elsevier) 2010.  
36  
37 73. Palmer ST, Martin DJ, Steedman WM, Ravey J, S. C-and A $\delta$ -fibre mediated thermal perception:  
38 response to rate of temperature change using method of limits. . *Somatosensory & motor*  
39 *research* 2000;17(4):325-33.  
40  
41 74. Chesterton LS SJ, Wright CC, Foster NE. Interrater reliability of algometry in measuring pressure  
42 pain thresholds in healthy humans, using multiple raters. *Clin J Pain* 2007;23(9):760-6.  
43  
44 75. Knutti IA SM, Opsommer E. Test-retest reliability of thermal quantitative sensory testing on two  
45 sites within the L5 dermatome of the lumbar spine and lower extremity. *Neurosci Lett*  
46 2014;5(579):157-62.  
47  
48 76. Greenspan JD, McGillis SL. Stimulus features relevant to the perception of sharpness and  
49 mechanically evoked cutaneous pain. *Somatosens Mot Res* 1991;8(2):137-47.  
50  
51 77. Sarlani E, Greenspan JD. Gender differences in temporal summation of mechanically evoked  
52 pain. *Pain* 2002;97(1-2):163-9.  
53  
54 78. Nie H, Arendt-Nielsen L, Andersen H, et al. Temporal summation of pain evoked by mechanical  
55 stimulation in deep and superficial tissue. *J Pain* 2005;6(6):348-55. doi:  
56 10.1016/j.jpain.2005.01.352  
57  
58 79. Nie H, Arendt-Nielsen L, Madeleine P, et al. Enhanced temporal summation of pressure pain in  
59 the trapezius muscle after delayed onset muscle soreness. *Exp Brain Res* 2006;170(2):182-  
60 90. doi: 10.1007/s00221-005-0196-6  
61  
62 80. Woolf CJ, Bennett GJ, Doherty M, et al. Towards a mechanism-based classification of pain? *Pain*  
63 1998;77(3):227-9.  
64  
65 81. Whicher JT ES. Acute phase proteins. *Hosp Update* 1990:899-905.  
66  
67 82. Gosling P, Dickson GR. Serum c-reactive protein in patients with serious trauma. *Injury*  
68 1992;23(7):483-6.  
69  
70 83. Sturmer T, Raum E, Buchner M, et al. Pain and high sensitivity C reactive protein in patients with  
71 chronic low back pain and acute sciatic pain. *Ann Rheum Dis* 2005;64(6):921-5. doi:  
72 10.1136/ard.2004.027045

- 1  
2  
3 84. Pepys MB, Hirschfield GM. C-reactive protein: a critical update. *J Clin Invest* 2003;111(12):1805-  
4 12. doi: 10.1172/JCI18921  
5  
6 85. Giannoudis PV HF, Pape HC. . Inflammatory serum markers in patients with multiple trauma. Can  
7 they predict outcome? *J Bone Joint Surg Br* 2004;86(3):313-23.  
8  
9 86. Barma M, Goodbrand, J.A., Donnan, P.T., McGilchrist, M.M., Frost, H., McMurdo, M.E. and  
10 Witham, M.D. Slower Decline in C-Reactive Protein after an Inflammatory Insult Is  
11 Associated with Longer Survival in Older Hospitalised Patients. . *PloS one*  
12 2016;11(7):e0159412.  
13  
14 87. Krysko DV, Agostinis P, Krysko O, et al. Emerging role of damage-associated molecular patterns  
15 derived from mitochondria in inflammation. *Trends Immunol* 2011;32(4):157-64. doi:  
16 10.1016/j.it.2011.01.005  
17  
18 88. Simmons JD, Lee YL, Mulekar S, et al. Elevated levels of plasma mitochondrial DNA DAMPs are  
19 linked to clinical outcome in severely injured human subjects. *Ann Surg* 2013;258(4):591-6;  
20 discussion 96-8. doi: 10.1097/SLA.0b013e3182a4ea46  
21  
22 89. Yamanouchi S, Kudo D, Yamada M, et al. Plasma mitochondrial DNA levels in patients with  
23 trauma and severe sepsis: time course and the association with clinical status. *J Crit Care*  
24 2013;28(6):1027-31. doi: 10.1016/j.jcrc.2013.05.006  
25  
26 90. Foster MA. Steroids and immunity from injury through to rehabilitation (SIR Study). University of  
27 Birmingham, 2013.



SPIRIT 2013 Checklist: Recommended items to address in a clinical trial protocol and related documents\*

| Section/item                      | Item No | Description                                                                                                                                                                                                                                                                                        |
|-----------------------------------|---------|----------------------------------------------------------------------------------------------------------------------------------------------------------------------------------------------------------------------------------------------------------------------------------------------------|
| <b>Administrative information</b> |         |                                                                                                                                                                                                                                                                                                    |
| Title                             | 1       | Descriptive title identifying the study design, population, interventions, and, if applicable, trial acronym – Page 1                                                                                                                                                                              |
| Trial registration                | 2a      | Trial identifier and registry name. If not yet registered, name of intended registry – N/A                                                                                                                                                                                                         |
|                                   | 2b      | All items from the World Health Organization Trial Registration Data Set – N/A                                                                                                                                                                                                                     |
| Protocol version                  | 3       | Date and version identifier – Page 1                                                                                                                                                                                                                                                               |
| Funding                           | 4       | Sources and types of financial, material, and other support – Page 25                                                                                                                                                                                                                              |
| Roles and responsibilities        | 5a      | Names, affiliations, and roles of protocol contributors – Pages 1, 25                                                                                                                                                                                                                              |
|                                   | 5b      | Name and contact information for the trial sponsor – Page 25                                                                                                                                                                                                                                       |
|                                   | 5c      | Role of study sponsor and funders, if any, in study design; collection, management, analysis, and interpretation of data; writing of the report; and the decision to submit the report for publication, including whether they will have ultimate authority over any of these activities – Page 25 |
|                                   | 5d      | Composition, roles, and responsibilities of the coordinating centre, steering committee, endpoint adjudication committee, data management team, and other individuals or groups overseeing the trial, if applicable (see Item 21a for data monitoring committee) – Page 25                         |
| <b>Introduction</b>               |         |                                                                                                                                                                                                                                                                                                    |
| Background and rationale          | 6a      | Description of research question and justification for undertaking the trial, including summary of relevant studies (published and unpublished) examining benefits and harms for each intervention – Page 5 (introduction, page 6 (aims and objectives)                                            |
|                                   | 6b      | Explanation for choice of comparators – Supplementary file                                                                                                                                                                                                                                         |
| Objectives                        | 7       | Specific objectives or hypotheses (Page 6)                                                                                                                                                                                                                                                         |

1  
2  
3  
4  
5  
6  
7  
8  
9  
10  
11  
12  
13  
14  
15  
16  
17  
18  
19  
20  
21  
22  
23  
24  
25  
26  
27  
28  
29  
30  
31  
32  
33  
34  
35  
36  
37  
38  
39  
40  
41  
42  
43  
44  
45  
46  
47  
48  
49  
50  
51  
52  
53  
54  
55  
56  
57  
58  
59  
60

|              |   |                                                                                                                                                                                                                    |
|--------------|---|--------------------------------------------------------------------------------------------------------------------------------------------------------------------------------------------------------------------|
| Trial design | 8 | Description of trial design including type of trial (eg, parallel group, crossover, factorial, single group), allocation ratio, and framework (eg, superiority, equivalence, noninferiority, exploratory) – Page 7 |
|--------------|---|--------------------------------------------------------------------------------------------------------------------------------------------------------------------------------------------------------------------|

### **Methods: Participants, interventions, and outcomes**

|               |   |                                                                                                                                                                                             |
|---------------|---|---------------------------------------------------------------------------------------------------------------------------------------------------------------------------------------------|
| Study setting | 9 | Description of study settings (eg, community clinic, academic hospital) and list of countries where data will be collected. Reference to where list of study sites can be obtained – Page 7 |
|---------------|---|---------------------------------------------------------------------------------------------------------------------------------------------------------------------------------------------|

|                      |    |                                                                                                                                                                                                           |
|----------------------|----|-----------------------------------------------------------------------------------------------------------------------------------------------------------------------------------------------------------|
| Eligibility criteria | 10 | Inclusion and exclusion criteria for participants. If applicable, eligibility criteria for study centres and individuals who will perform the interventions (eg, surgeons, psychotherapists) – Pages 8-10 |
|----------------------|----|-----------------------------------------------------------------------------------------------------------------------------------------------------------------------------------------------------------|

|               |     |                                                                                                                                  |
|---------------|-----|----------------------------------------------------------------------------------------------------------------------------------|
| Interventions | 11a | Interventions for each group with sufficient detail to allow replication, including how and when they will be administered – N/A |
|---------------|-----|----------------------------------------------------------------------------------------------------------------------------------|

|  |     |                                                                                                                                                                                                      |
|--|-----|------------------------------------------------------------------------------------------------------------------------------------------------------------------------------------------------------|
|  | 11b | Criteria for discontinuing or modifying allocated interventions for a given trial participant (eg, drug dose change in response to harms, participant request, or improving/worsening disease) – N/A |
|--|-----|------------------------------------------------------------------------------------------------------------------------------------------------------------------------------------------------------|

|  |     |                                                                                                                                                         |
|--|-----|---------------------------------------------------------------------------------------------------------------------------------------------------------|
|  | 11c | Strategies to improve adherence to intervention protocols, and any procedures for monitoring adherence (eg, drug tablet return, laboratory tests) – N/A |
|--|-----|---------------------------------------------------------------------------------------------------------------------------------------------------------|

|  |     |                                                                                                     |
|--|-----|-----------------------------------------------------------------------------------------------------|
|  | 11d | Relevant concomitant care and interventions that are permitted or prohibited during the trial – N/A |
|--|-----|-----------------------------------------------------------------------------------------------------|

|          |    |                                                                                                                                                                                                                                                                                                                                                                                                                                                       |
|----------|----|-------------------------------------------------------------------------------------------------------------------------------------------------------------------------------------------------------------------------------------------------------------------------------------------------------------------------------------------------------------------------------------------------------------------------------------------------------|
| Outcomes | 12 | Primary, secondary, and other outcomes, including the specific measurement variable (eg, systolic blood pressure), analysis metric (eg, change from baseline, final value, time to event), method of aggregation (eg, median, proportion), and time point for each outcome. Explanation of the clinical relevance of chosen efficacy and harm outcomes is strongly recommended – Page 10 (primary outcome), Supplementary file (candidate predictors) |
|----------|----|-------------------------------------------------------------------------------------------------------------------------------------------------------------------------------------------------------------------------------------------------------------------------------------------------------------------------------------------------------------------------------------------------------------------------------------------------------|

|                      |    |                                                                                                                                                                                               |
|----------------------|----|-----------------------------------------------------------------------------------------------------------------------------------------------------------------------------------------------|
| Participant timeline | 13 | Time schedule of enrolment, interventions (including any run-ins and washouts), assessments, and visits for participants. A schematic diagram is highly recommended (see Figure) – Pages 8-10 |
|----------------------|----|-----------------------------------------------------------------------------------------------------------------------------------------------------------------------------------------------|

|             |    |                                                                                                                                                                                                     |
|-------------|----|-----------------------------------------------------------------------------------------------------------------------------------------------------------------------------------------------------|
| Sample size | 14 | Estimated number of participants needed to achieve study objectives and how it was determined, including clinical and statistical assumptions supporting any sample size calculations – Pages 14-15 |
|-------------|----|-----------------------------------------------------------------------------------------------------------------------------------------------------------------------------------------------------|

|             |    |                                                                                                   |
|-------------|----|---------------------------------------------------------------------------------------------------|
| Recruitment | 15 | Strategies for achieving adequate participant enrolment to reach target sample size – Pages 14-15 |
|-------------|----|---------------------------------------------------------------------------------------------------|

### **Methods: Assignment of interventions (for controlled trials)**

Allocation:

|    |                |     |                                                                         |
|----|----------------|-----|-------------------------------------------------------------------------|
| 1  |                |     |                                                                         |
| 2  | Sequence       | 16a | Method of generating the allocation sequence (eg, computer-             |
| 3  | generation     |     | generated random numbers), and list of any factors for stratification.  |
| 4  |                |     | To reduce predictability of a random sequence, details of any planned   |
| 5  |                |     | restriction (eg, blocking) should be provided in a separate document    |
| 6  |                |     | that is unavailable to those who enrol participants or assign           |
| 7  |                |     | interventions – N/A                                                     |
| 8  |                |     |                                                                         |
| 9  | Allocation     | 16b | Mechanism of implementing the allocation sequence (eg, central          |
| 10 | concealment    |     | telephone; sequentially numbered, opaque, sealed envelopes),            |
| 11 | mechanism      |     | describing any steps to conceal the sequence until interventions are    |
| 12 |                |     | assigned – N/A                                                          |
| 13 |                |     |                                                                         |
| 14 | Implementation | 16c | Who will generate the allocation sequence, who will enrol participants, |
| 15 |                |     | and who will assign participants to interventions – N/A                 |
| 16 |                |     |                                                                         |
| 17 | Blinding       | 17a | Who will be blinded after assignment to interventions (eg, trial        |
| 18 | (masking)      |     | participants, care providers, outcome assessors, data analysts), and    |
| 19 |                |     | how N/A                                                                 |
| 20 |                |     |                                                                         |
| 21 |                | 17b | If blinded, circumstances under which unblinding is permissible, and    |
| 22 |                |     | procedure for revealing a participant's allocated intervention during   |
| 23 |                |     | the trial – N/A                                                         |
| 24 |                |     |                                                                         |
| 25 |                |     |                                                                         |

### Methods: Data collection, management, and analysis

|    |                 |     |                                                                          |
|----|-----------------|-----|--------------------------------------------------------------------------|
| 26 |                 |     |                                                                          |
| 27 |                 |     |                                                                          |
| 28 | Data collection | 18a | Plans for assessment and collection of outcome, baseline, and other      |
| 29 | methods         |     | trial data, including any related processes to promote data quality (eg, |
| 30 |                 |     | duplicate measurements, training of assessors) and a description of      |
| 31 |                 |     | study instruments (eg, questionnaires, laboratory tests) along with      |
| 32 |                 |     | their reliability and validity, if known. Reference to where data        |
| 33 |                 |     | collection forms can be found, if not in the protocol – Pages 10-14,     |
| 34 |                 |     | Supplementary file                                                       |
| 35 |                 |     |                                                                          |
| 36 |                 | 18b | Plans to promote participant retention and complete follow-up,           |
| 37 |                 |     | including list of any outcome data to be collected for participants who  |
| 38 |                 |     | discontinue or deviate from intervention protocols – Page 9              |
| 39 |                 |     | (withdrawals)                                                            |
| 40 |                 |     |                                                                          |
| 41 |                 |     |                                                                          |
| 42 | Data            | 19  | Plans for data entry, coding, security, and storage, including any       |
| 43 | management      |     | related processes to promote data quality (eg, double data entry;        |
| 44 |                 |     | range checks for data values). Reference to where details of data        |
| 45 |                 |     | management procedures can be found, if not in the protocol – Page        |
| 46 |                 |     | 14                                                                       |
| 47 |                 |     |                                                                          |
| 48 | Statistical     | 20a | Statistical methods for analysing primary and secondary outcomes.        |
| 49 | methods         |     | Reference to where other details of the statistical analysis plan can be |
| 50 |                 |     | found, if not in the protocol – Page 15-16                               |
| 51 |                 |     |                                                                          |
| 52 |                 | 20b | Methods for any additional analyses (eg, subgroup and adjusted           |
| 53 |                 |     | analyses) – Page 16 (screening tool development and validation)          |
| 54 |                 |     |                                                                          |
| 55 |                 |     |                                                                          |
| 56 |                 |     |                                                                          |
| 57 |                 |     |                                                                          |
| 58 |                 |     |                                                                          |
| 59 |                 |     |                                                                          |
| 60 |                 |     |                                                                          |

1  
2  
3  
4  
5  
6  
7  
8  
9  
10  
11  
12  
13  
14  
15  
16  
17  
18  
19  
20  
21  
22  
23  
24  
25  
26  
27  
28  
29  
30  
31  
32  
33  
34  
35  
36  
37  
38  
39  
40  
41  
42  
43  
44  
45  
46  
47  
48  
49  
50  
51  
52  
53  
54  
55  
56  
57  
58  
59  
60

20c Definition of analysis population relating to protocol non-adherence (eg, as randomised analysis), and any statistical methods to handle missing data (eg, multiple imputation) – Page 15 (imputation)

### Methods: Monitoring

Data monitoring 21a Composition of data monitoring committee (DMC); summary of its role and reporting structure; statement of whether it is independent from the sponsor and competing interests; and reference to where further details about its charter can be found, if not in the protocol. Alternatively, an explanation of why a DMC is not needed – N/A

21b Description of any interim analyses and stopping guidelines, including who will have access to these interim results and make the final decision to terminate the trial – N/A

Harms 22 Plans for collecting, assessing, reporting, and managing solicited and spontaneously reported adverse events and other unintended effects of trial interventions or trial conduct – N/A

Auditing 23 Frequency and procedures for auditing trial conduct, if any, and whether the process will be independent from investigators and the sponsor – N/A

### Ethics and dissemination

Research ethics approval 24 Plans for seeking research ethics committee/institutional review board (REC/IRB) approval – Pages 19-20

Protocol amendments 25 Plans for communicating important protocol modifications (eg, changes to eligibility criteria, outcomes, analyses) to relevant parties (eg, investigators, REC/IRBs, trial participants, trial registries, journals, regulators) – N/A

Consent or assent 26a Who will obtain informed consent or assent from potential trial participants or authorised surrogates, and how (see Item 32) – Pages 9-10

26b Additional consent provisions for collection and use of participant data and biological specimens in ancillary studies, if applicable – N/A

Confidentiality 27 How personal information about potential and enrolled participants will be collected, shared, and maintained in order to protect confidentiality before, during, and after the trial – Page 14

Declaration of interests 28 Financial and other competing interests for principal investigators for the overall trial and each study site – Page 25

Access to data 29 Statement of who will have access to the final trial dataset, and disclosure of contractual agreements that limit such access for investigators – Not present

|    |                   |     |                                                                              |
|----|-------------------|-----|------------------------------------------------------------------------------|
| 1  |                   |     |                                                                              |
| 2  | Ancillary and     | 30  | Provisions, if any, for ancillary and post-trial care, and for               |
| 3  | post-trial care   |     | compensation to those who suffer harm from trial participation – N/A         |
| 4  |                   |     |                                                                              |
| 5  | Dissemination     | 31a | Plans for investigators and sponsor to communicate trial results to          |
| 6  | policy            |     | participants, healthcare professionals, the public, and other relevant       |
| 7  |                   |     | groups (eg, via publication, reporting in results databases, or other        |
| 8  |                   |     | data sharing arrangements), including any publication restrictions –         |
| 9  |                   |     | N/A                                                                          |
| 10 |                   |     |                                                                              |
| 11 |                   | 31b | Authorship eligibility guidelines and any intended use of professional       |
| 12 |                   |     | writers – N/A                                                                |
| 13 |                   |     |                                                                              |
| 14 |                   | 31c | Plans, if any, for granting public access to the full protocol, participant- |
| 15 |                   |     | level dataset, and statistical code – N/A                                    |
| 16 |                   |     |                                                                              |
| 17 | <b>Appendices</b> |     |                                                                              |
| 18 |                   |     |                                                                              |
| 19 | Informed consent  | 32  | Model consent form and other related documentation given to                  |
| 20 | materials         |     | participants and authorised surrogates – N/A                                 |
| 21 |                   |     |                                                                              |
| 22 | Biological        | 33  | Plans for collection, laboratory evaluation, and storage of biological       |
| 23 | specimens         |     | specimens for genetic or molecular analysis in the current trial and for     |
| 24 |                   |     | future use in ancillary studies, if applicable – N/A                         |
| 25 |                   |     |                                                                              |

---

26 \*It is strongly recommended that this checklist be read in conjunction with the SPIRIT 2013  
 27 Explanation & Elaboration for important clarification on the items. Amendments to the  
 28 protocol should be tracked and dated. The SPIRIT checklist is copyrighted by the SPIRIT  
 29 Group under the Creative Commons "[Attribution-NonCommercial-NoDerivs 3.0 Unported](https://creativecommons.org/licenses/by-nc-nd/3.0/)"  
 30 license.  
 31  
 32  
 33  
 34  
 35  
 36  
 37  
 38  
 39  
 40  
 41  
 42  
 43  
 44  
 45  
 46  
 47  
 48  
 49  
 50  
 51  
 52  
 53  
 54  
 55  
 56  
 57  
 58  
 59  
 60

# BMJ Open

## DEVELOPMENT OF A SCREENING TOOL TO PREDICT THE RISK OF CHRONIC PAIN AND DISABILITY FOLLOWING MUSCULOSKELETAL TRAUMA: PROTOCOL FOR A PROSPECTIVE OBSERVATIONAL STUDY IN THE UNITED KINGDOM

|                                 |                                                                                                                                                                                                                                                                                                                                                                                                                                                                                                                                                                                                                                                                                                                                                                                                                                            |
|---------------------------------|--------------------------------------------------------------------------------------------------------------------------------------------------------------------------------------------------------------------------------------------------------------------------------------------------------------------------------------------------------------------------------------------------------------------------------------------------------------------------------------------------------------------------------------------------------------------------------------------------------------------------------------------------------------------------------------------------------------------------------------------------------------------------------------------------------------------------------------------|
| Journal:                        | <i>BMJ Open</i>                                                                                                                                                                                                                                                                                                                                                                                                                                                                                                                                                                                                                                                                                                                                                                                                                            |
| Manuscript ID                   | bmjopen-2017-017876.R3                                                                                                                                                                                                                                                                                                                                                                                                                                                                                                                                                                                                                                                                                                                                                                                                                     |
| Article Type:                   | Protocol                                                                                                                                                                                                                                                                                                                                                                                                                                                                                                                                                                                                                                                                                                                                                                                                                                   |
| Date Submitted by the Author:   | 01-Feb-2018                                                                                                                                                                                                                                                                                                                                                                                                                                                                                                                                                                                                                                                                                                                                                                                                                                |
| Complete List of Authors:       | Rushton, Alison; University of Birmingham, School of Sport, Exercise and Rehabilitation Sciences<br>Evans, David; University of Birmingham, School of Sport, Exercise and Rehabilitation Sciences<br>Middlebrook, Nicola; University of Birmingham, School of Sport, Exercise and Rehabilitation Sciences<br>Heneghan, Nicola; University of Birmingham, School of Sport, Exercise and Rehabilitation Sciences<br>Small, Charlotte; University of Birmingham, NIHR Surgical Reconstruction & Microbiology Research Centre<br>Lord, Janet; University of Birmingham, NIHR Surgical Reconstruction & Microbiology Research Centre<br>Patel, Jaimin; University of Birmingham, NIHR Surgical Reconstruction & Microbiology Research Centre<br>Falla, Deborah; University of Birmingham, School of Sport, Exercise and Rehabilitation Sciences |
| <b>Primary Subject Heading</b>: | Rehabilitation medicine                                                                                                                                                                                                                                                                                                                                                                                                                                                                                                                                                                                                                                                                                                                                                                                                                    |
| Secondary Subject Heading:      | Medical management                                                                                                                                                                                                                                                                                                                                                                                                                                                                                                                                                                                                                                                                                                                                                                                                                         |
| Keywords:                       | Musculoskeletal trauma, Precision rehabilitation, Pain mechanisms                                                                                                                                                                                                                                                                                                                                                                                                                                                                                                                                                                                                                                                                                                                                                                          |
|                                 |                                                                                                                                                                                                                                                                                                                                                                                                                                                                                                                                                                                                                                                                                                                                                                                                                                            |

SCHOLARONE™  
Manuscripts

**TITLE PAGE****DEVELOPMENT OF A SCREENING TOOL TO PREDICT THE RISK OF CHRONIC PAIN AND DISABILITY FOLLOWING MUSCULOSKELETAL TRAUMA: PROTOCOL FOR A PROSPECTIVE OBSERVATIONAL STUDY IN THE UNITED KINGDOM**

Rushton A<sup>1,2</sup>, Evans DW<sup>1,2</sup>, Middlebrook N<sup>1,2</sup>, Heneghan N<sup>1</sup>, Small C<sup>2</sup>, Lord J<sup>2</sup>, Patel JM<sup>2</sup>, Falla D<sup>1,2</sup>.

**Affiliations**

<sup>1</sup> Centre of Precision Rehabilitation for Spinal Pain  
School of Sport, Exercise and Rehabilitation Sciences  
College of Life and Environmental Sciences  
University of Birmingham  
Edgbaston  
Birmingham  
B15 2TT  
United Kingdom

<sup>2</sup> NIHR Surgical Reconstruction & Microbiology Research Centre  
University of Birmingham  
Edgbaston  
Birmingham  
B15 2TT  
United Kingdom

**Correspondence:**

Professor Deborah Falla  
Centre of Precision Rehabilitation for Spinal Pain  
School of Sport, Exercise and Rehabilitation Sciences,  
College of Life and Environmental Sciences,  
University of Birmingham,  
Birmingham, B15 2TT, UK.  
Tel: +44 121 415 4220  
Email: d.falla@bham.ac.uk

## 1 **ABSTRACT**

### 2 **Introduction**

3 Pain is an expected and appropriate experience following traumatic musculoskeletal injury.  
4 By contrast, chronic pain and disability are unhelpful yet common sequelae of trauma-related  
5 injuries. Presently, the mechanisms that underlie the transition from acute to chronic  
6 disabling post-traumatic pain are not fully understood. Such knowledge would facilitate the  
7 development and implementation of precision rehabilitation approaches that match  
8 interventions to projected risk of recovery, with the aim of preventing poor long-term  
9 outcomes. The aim of this study is to identify a set of predictive factors to identify patients at  
10 risk of developing ongoing post-traumatic pain and disability following acute  
11 musculoskeletal trauma. To achieve this, we will use a unique and comprehensive  
12 combination of patient-reported outcome measures, psychophysical testing and biomarkers.

### 14 **Methods/analysis**

15 A prospective observational study will recruit two temporally staggered cohorts [n=250 each  
16 cohort; at least 10 cases per candidate predictor] of consecutive acute musculoskeletal trauma  
17 patients aged  $\geq 16$  years, who are emergency admissions into a Major Trauma Centre in the  
18 United Kingdom, with an episode inception defined as the traumatic event. The first cohort  
19 will identify candidate predictors to develop a screening tool to predict development of  
20 chronic and disabling pain, and the second will allow evaluation of the predictive  
21 performance of the tool [validation]. The outcome being predicted is an individual's absolute  
22 risk of poor outcome measured at 6 months follow-up using the Chronic Pain Grade Scale  
23 [poor outcome  $\geq$  Grade II]. Candidate predictors encompass the four primary mechanisms of  
24 pain: *nociceptive* [e.g. injury location], *neuropathic* [e.g. painDETECT], *inflammatory*  
25 [biomarkers], and *nociplastic* [e.g. quantitative sensory testing]. Concurrently, patient-

1  
2  
3  
4  
5  
6  
7  
8  
9  
10  
11  
12  
13  
14  
15  
16  
17  
18  
19  
20  
21  
22  
23  
24  
25  
26  
27  
28  
29  
30  
31  
32  
33  
34  
35  
36  
37  
38  
39  
40  
41  
42  
43  
44  
45  
46  
47  
48  
49  
50  
51  
52  
53  
54  
55  
56  
57  
58  
59  
60

1 reported outcome measures will assess general health and psychosocial factors [e.g. pain self-  
2 efficacy]. Risk of poor outcome will be calculated using multiple variable regression analysis.

3

#### 4 **Ethics and dissemination**

5

6 Approved by the NHS Research Ethics Committee (17/WA/0421).

#### 7 Keywords

8 Keywords: Pain mechanisms, Prediction, Precision rehabilitation, Musculoskeletal trauma

9

10 Funding: NIHR SRMRC

11

#### 12 Word count

13 4228 [excluding tables and references]

For peer review only

## STRENGTHS AND LIMITATIONS OF THIS STUDY

- A comprehensive array of candidate predictive factors will allow for the prediction of chronic and disabling pain following trauma
- These predictive factors will enable the development and validation of a predictive tool to predict good and poor outcome at 6 months post-injury
- The prospective design of the study enables control of unwarranted influences, and enables a stronger case for inferring causal relationships
- Identifying predictive factors related to poor outcome of pain and disability outcome will facilitate targeting of effective interventions
- Other candidate predictors may have been useful to include [e.g. vibration thresholds], but consideration of burden to participants of testing and sample size considerations necessitated prioritisation of candidate predictive factors.

## INTRODUCTION

Pain is an expected and appropriate experience that usually follows traumatic injury.<sup>1</sup> By contrast, chronic pain and disability are unhelpful but common sequelae of trauma-related injuries.<sup>2</sup> Gaining an understanding of why some people develop chronic and disabling post-traumatic pain is therefore a priority for individual patients, the military and society at large. Notwithstanding, the mechanisms that underlie the transition from acute to chronic disabling post-traumatic pain are not fully understood. Such knowledge would facilitate the development and implementation of a clinical pathway of care that matches interventions to projected risk of poor recovery, with the aim of preventing poor long-term outcomes. This project stems from advances in knowledge relating to the assessment and management of pain<sup>3</sup> and the quantification of potential predictive factors to inform personalised rehabilitation; identifying which patients to target with rehabilitation and when and how to target them.

Few studies have specifically explored predictive factors for recovery, whether poor or good, following physical trauma. Of those that have, psychosocial variables such as anxiety, depression and post-traumatic stress, have so far been identified as the strongest predictors of outcome.<sup>4-7</sup> However, only a limited number of variables have hitherto been evaluated as potential predictive factors. Indeed, current opinion regarding pain mechanisms<sup>8</sup> suggests that the development of chronic pain and disability cannot be entirely attributable to psychosocial factors. This is consistent with research in primary care that has identified predictive factors for poor outcome across a range of musculoskeletal pain conditions<sup>9</sup>, which include: widespread pain, high functional disability, high pain intensity, long pain duration,

1  
2  
3 high depression/anxiety, presence of previous pain episodes, movement restriction, and poor  
4 coping strategies. Moreover, developments in the mechanistic understanding of pain<sup>10-12</sup>  
5 suggest that other measures [e.g. indicators of central sensitisation, inflammatory activity]  
6  
7 may have potential predictive utility, especially in an acute trauma population.  
8  
9  
10

### 11 12 13 **Aims of study**

14  
15  
16  
17  
18 Using a unique combination of: 1) general patient characteristics including premorbid  
19 neuropsychological status, 2) quality of life and physical functioning, 3) psychosocial  
20 features, 4) injury characteristics, 5) pain characteristics, 6) quantitative sensory testing, and  
21  
22 7) biomarkers; we aim to find a set of predictive factors to identify patients at risk of  
23  
24 developing ongoing post-traumatic pain and disability following acute musculoskeletal  
25  
26 trauma. This will subsequently inform the feasibility of developing and evaluating a new  
27  
28 clinical care pathway of precision rehabilitation that matches interventions to the predicted  
29  
30 risk of poor recovery.  
31  
32  
33  
34  
35  
36

### 37 **Objectives**

- 38  
39  
40  
41 1) Identify predictive factors for poor outcome [chronic pain and disability at 6-months post-  
42 injury] following acute musculoskeletal trauma.  
43  
44 2) Develop a predictive model to inform a screening tool to identify the predicted risk of poor  
45 recovery [transition from acute post-traumatic pain to chronic pain and disability].  
46  
47 3) Estimate the predictive performance of the screening tool through validation of the model  
48  
49  
50  
51  
52 in a separate data set.  
53  
54  
55  
56  
57  
58  
59  
60

1  
2  
3 4) Document the clinical course of symptoms at 3 and 12 months following acute  
4  
5 musculoskeletal trauma.  
6  
7

## 8 9 **METHODS AND ANALYSIS**

### 10 11 12 13 **Source of data**

14  
15  
16  
17  
18 The study will be a prospective, observational study of two temporally staggered  
19 cohorts of trauma patients, who are emergency department admissions into a Major Trauma  
20 Centre in the United Kingdom, with an episode inception defined as the traumatic event  
21 [Figure 1]. The first cohort will facilitate development of the prediction model to inform the  
22 screening tool, and the second will enable validation of the prediction model through  
23 evaluation of the predictive performance of the model and tool.<sup>13 14</sup> There will be an interval  
24 of at least 6 months between recruitment into the two respective cohorts. The prospective  
25 design enables control of unwarranted influences, and enables a stronger case for inferring  
26 causal relationships. The nature of the study necessitates predictive statistical modelling.<sup>15</sup>  
27  
28 This protocol is written in line with the TRIPOD statement,<sup>16</sup> in which recommendations are  
29 given for the reporting of prediction model development and validation.  
30  
31  
32  
33  
34  
35  
36  
37  
38  
39  
40  
41  
42  
43

44 Self-reported and physical assessment predictive data will be collected at baseline  
45 over a period of up to 14 days [or duration of inpatient stay if shorter], which will commence  
46 immediately following recruitment. Biomarker data collection will occur throughout the same  
47 baseline period, but can commence prior to recruitment providing assent is gained from a  
48 legal consultee. The outcome data will be collected at 6-months post-injury [working  
49 definition of chronic pain];<sup>17</sup> ; the point of evaluation of an individual's absolute risk of poor  
50  
51  
52  
53  
54  
55  
56  
57  
58  
59  
60

1  
2  
3 outcome [objectives 1, 2 and 3]. In addition, selected data will be measured at 3 and 12-  
4  
5 months post-injury to explore the clinical course of recovery following injury in the shorter  
6  
7 and longer term [objective 4].  
8  
9

## 10 11 **Figure 1. Study design**

12  
13  
14  
15 [Insert Figure 1 here].  
16  
17  
18  
19

## 20 **Participants**

21  
22  
23  
24 Participants will be recruited from the register of a Major Trauma Centre in the  
25  
26 United Kingdom for a period of up to 24 months [planned start date January 2018]. All  
27  
28 consecutive eligible patients will be approached for recruitment until the sample size is  
29  
30 achieved.  
31  
32  
33  
34

## 35 *Eligibility criteria*

36  
37  
38  
39 Inclusion criteria: Adult patients aged  $\geq 16$  years who are emergency department  
40  
41 admissions into the Major Trauma Centre, with their main criteria for admission being acute  
42  
43 musculoskeletal trauma within the preceding 14 days, and a capacity to use and understand  
44  
45 written and verbal English language and a mental capacity to provide informed consent [e.g.  
46  
47 no confusion, delirium, severe cognitive impairment, or severe mental illness, defined by a  
48  
49 score of 6 or less on the Abbreviated Mental Test]<sup>18</sup>. The primary reason for including  
50  
51 patients with trauma occurring up to 14 days previously is to be inclusive of patients who are  
52  
53 critically ill and/or with diminished mental capacity initially following their trauma, and  
54  
55  
56  
57  
58  
59  
60

1  
2  
3 patients requiring surgery as a result of the trauma; representative of the broad trauma  
4  
5 population.  
6  
7  
8  
9

10 Exclusion criteria: Exclusions will be made where the patient has an acute intra-  
11 cranial lesion [e.g. bleed] combined with a score of  $\leq 14$  on the Glasgow Coma Scale<sup>19</sup> [a 15-  
12 item measure of consciousness impairment with adequate reliability<sup>20</sup> that is routinely taken  
13 in trauma patients at hospital admission], where there is evident brain or central nervous  
14 system injury or impairment, long-term neuro-cognitive disorders [such as brain tumour,  
15 multiple sclerosis, Alzheimer's and Parkinson's diseases, etc.], comorbid cancer, the presence  
16 of an ongoing rheumatological condition, prolonged use of corticosteroids, or terminal illness  
17 with short life expectancy.  
18  
19  
20  
21  
22  
23  
24  
25  
26  
27  
28  
29

30 Withdrawals: Participants will be informed that they are free to withdraw from the  
31 study at any time, without needing to provide reason. In the event of death within 3 months of  
32 being recruited, participants will be automatically withdrawn from the study and the primary  
33 predictive analysis. Baseline data of all withdrawn participants will be kept and compared to  
34 those of retained participants to assess for any differences.  
35  
36  
37  
38  
39  
40  
41  
42  
43  
44  
45  
46

## 47 **Recruitment**

48 Based on feasibility data [site data from the Trauma Audit and Research Network], it  
49 is estimated that at least 1,000 eligible trauma patients will be approachable for recruitment  
50 over a 24-month period, and that 50% would be expected to consent to participation. A  
51 dedicated team of research nurses will be available to recruit patients 7 days per week [from  
52 0700 to 1930].  
53  
54  
55  
56  
57  
58  
59  
60

1  
2  
3  
4  
5 Because of impairments resulting from their injuries, some otherwise eligible patients  
6  
7 will lack the mental capacity to provide informed consent when first approached to enrol in  
8  
9 the study. Recruitment into the study will therefore be undertaken under the guidance and  
10  
11 provision of the [UK] Mental Capacity Act 2005 for research in emergency situations. If the  
12  
13 patient lacks sufficient capacity to consent, written assent for study participation will be  
14  
15 sought from a legal consultee to begin biomarker data collection [blood samples], with  
16  
17 informed consent for full recruitment [and subsequent data collection] being sought from the  
18  
19 patient only if, and when, they regain sufficient capacity to provide this. If the patient does  
20  
21 not regain capacity to provide consent within 14 days of their trauma, they will not be  
22  
23 recruited into the study, biomarker data collection will cease, and any blood samples already  
24  
25 collected will be destroyed before analysis.  
26  
27  
28  
29  
30

31 Once informed consent is gained and the participant recruited, following a minimum  
32  
33 1 hour lead time after the informed consent process [to reduce patient burden], members of  
34  
35 the research team will visit the patient at their bedside to collect baseline self-reported data  
36  
37 via questionnaires [Table 1]. On the next available working day following completion of the  
38  
39 questionnaires [again, to reduce patient burden], members of the study team will return to the  
40  
41 patient to conduct the first physical [quantitative sensory testing] assessment. At each visit, if  
42  
43 deemed necessary the capacity of the participant will be checked using an Abbreviated  
44  
45 Mental Test<sup>18</sup> [a score of 6 or lower is indicative of reduced capacity], and asked if they are  
46  
47 happy to proceed with data collection.  
48  
49  
50  
51

## 52 **Outcome**

53  
54  
55  
56  
57  
58  
59  
60

1  
2  
3 The outcome for the prediction model is an individual's absolute risk of poor outcome  
4 [chronic pain and disability] at 6 months post-injury. Outcome will be measured using the  
5 Chronic Pain Grade Scale [CPGS],<sup>21</sup> which combines pain intensity and pain-related  
6 disability over the preceding 6-months into a single measure of pain *severity*. The CPGS has  
7 previously been used to assess the severity of body-wide chronic pain in general population,<sup>22</sup>  
8 primary care<sup>23</sup> and post-trauma<sup>24</sup> populations. Each item of the CPGS relates to at least one of  
9 the three categories of the International Classification of Functioning, Disability and Health  
10 [ICF]<sup>25</sup>: impairment, activity limitations and restricted participation. Furthermore, all ICF  
11 categories are encompassed by the CPGS.<sup>26</sup> The CPGS is a unidimensional scale, with good  
12 internal consistency across different pain populations; Cronbach's alpha of 0.84 to 0.91 in  
13 back pain, 0.79 for headache, and 0.84 for temporomandibular pain.<sup>21 27</sup> With regards to  
14 construct validity, cross-sectional and longitudinal studies of general practice patients have  
15 shown high scores on the CPGS, indicating greater chronic pain, to be associated with higher  
16 rates of unemployment, greater pain impact scale scores, greater use of opioid analgesics and  
17 physician visits, depressed mood, and lower self-rated health status.<sup>21 27 28</sup> For convergent  
18 validity, the CPGS has been found to have good correlation with equivalent dimensions of  
19 the SF-36.<sup>27 28</sup> In terms of responsiveness, changes in score over time in patients with chronic  
20 musculoskeletal pain correlated significantly with changes in SF-36 scores.<sup>29</sup> The CPGS has  
21 also been shown to have good test-retest reliability in primary care patients with back pain  
22 [weighted kappa 0.81, 95% CI 0.65, 0.98].<sup>27</sup>

23  
24  
25  
26  
27  
28  
29  
30  
31  
32  
33  
34  
35  
36  
37  
38  
39  
40  
41  
42  
43  
44  
45  
46 Although pain persistence is not used in assigning pain grade, a measure of pain days  
47 in the prior 6-months is included in the CPGS.<sup>30</sup> The responses on the remaining 7-items are  
48 used for computing scores for the 3 subscales of the CPGS:<sup>21</sup> characteristic pain intensity,  
49 disability score, and disability points. The characteristic pain intensity score [range: 0-100] is  
50 obtained by calculating the mean of 3 pain intensity measurements: 'at the present time', the  
51  
52  
53  
54  
55  
56  
57  
58  
59  
60

1  
2  
3 ‘worst pain’ in the preceding 6 months, and the ‘average’ pain over the preceding 6 months.

4  
5 The disability score [range: 0-100] is obtained through the mean ratings of how much the  
6  
7 pain has interfered in performing activities of daily living, recreational, social and family  
8  
9 activities, and work [including housework] activities in the last 6-months. The disability  
10  
11 points are scored 0-3 and are derived from a combination of ranked categories of the number  
12  
13 of disability days [the number of days that the respondent was away from usual activities in  
14  
15 the preceding 6 months due to pain] and disability score. Based on these scores, the  
16  
17 participant’s chronic pain and disability status can then be classified into one of the 5 ordinal  
18  
19 categories of chronic pain severity:<sup>21</sup> no pain [Grade 0], low disability and low intensity pain  
20  
21 [Grade I], low disability and high intensity pain [Grade II], high disability and moderately  
22  
23 limiting intensity pain [Grade III], and high disability and severely limiting intensity pain  
24  
25 [Grade IV]. As in previous studies, poor outcome will be defined as Grade  $\geq$ II.<sup>23 31-34</sup>  
26  
27  
28  
29  
30

### 31 **Candidate predictors**

32  
33  
34  
35 Candidate predictors have been selected that are: [1] reliable and valid measures of  
36  
37 their domain, and [2] have a theoretical association with the development of chronic pain.  
38  
39 Both modifiable and non-modifiable candidate predictors are included. Candidate predictors  
40  
41 are summarised in Table 1, with further detail in Supplementary file S1. Table 1 details  
42  
43 important data that will be measured at 3, 6 and 12-months post-injury to explore the clinical  
44  
45 course of recovery following injury in the shorter and longer term. All data collection will be  
46  
47 standardised through protocols and clinical report forms.  
48  
49  
50  
51  
52

53 **Table 1: Summary of data collection at different assessment points**

| 54<br>55 <b>Domain / Candidate predictor</b> | 56<br>57 <b>Measure / data item</b> | 58<br>59 <b>Baseline Commencing <math>\leq</math>14 days</b> | 60<br><b>3 months Clinical course</b> | <b>6 months Outcome assessment</b> | <b>12 months Clinical course</b> |
|----------------------------------------------|-------------------------------------|--------------------------------------------------------------|---------------------------------------|------------------------------------|----------------------------------|
|----------------------------------------------|-------------------------------------|--------------------------------------------------------------|---------------------------------------|------------------------------------|----------------------------------|

|                                                                                      |                                                                                                                                                                | <i>post-trauma</i> |   | <i>point / clinical course</i> |   |
|--------------------------------------------------------------------------------------|----------------------------------------------------------------------------------------------------------------------------------------------------------------|--------------------|---|--------------------------------|---|
| <b>General patient characteristics including premorbid neuropsychological status</b> |                                                                                                                                                                |                    |   |                                |   |
| Age                                                                                  | In years                                                                                                                                                       | √                  |   |                                |   |
| Gender                                                                               | Female / male / other                                                                                                                                          | √                  |   |                                |   |
| Body Mass Index [BMI]                                                                | Calculated from height and weight measurements                                                                                                                 | √                  |   |                                |   |
| Education                                                                            | Highest educational level attained                                                                                                                             | √                  |   |                                |   |
| Employment status                                                                    | Full-time/ part-time / not working / retired / student<br>Employed / self-employed                                                                             | √                  | √ | √                              | √ |
| Circumstance of trauma                                                               | Military / civilian                                                                                                                                            | √                  |   |                                |   |
| Previous history of musculoskeletal pain and injury                                  | Patient history data from patient recollection and medical records                                                                                             | √                  |   |                                |   |
| Comorbidity of other health problems                                                 | Patient history data from patient recollection and medical records                                                                                             | √                  |   |                                |   |
| Premorbid physical health                                                            | Patient history data from patient recollection and medical records                                                                                             | √                  |   |                                |   |
| Premorbid psychological health                                                       | Patient history data from medical records and patient recollection [including non-somatic items from the Subjective Health Complaints Inventory] <sup>35</sup> | √                  |   |                                |   |
| Number of days in hospital                                                           | Intensive care / ward / total                                                                                                                                  | √                  |   |                                |   |
| <b>Quality of life and physical functioning</b>                                      |                                                                                                                                                                |                    |   |                                |   |
| General health                                                                       | 36-item Short Form Health Survey, version 2 [SF-36v2] <sup>36</sup>                                                                                            | √                  | √ | √                              | √ |
| Health-related quality of life                                                       | EuroQol EQ-5D-5L <sup>37</sup>                                                                                                                                 | √                  | √ | √                              | √ |
| Self-care and mobility during activities of daily living                             | Barthel Index of Activities of Daily Living, <sup>38</sup> collected from hospital data                                                                        | √                  |   |                                |   |
| Sleep quality                                                                        | 11-point [0-10] Numerical Rating Scales, relating to current pain, from 'best possible sleep' to 'worst possible sleep' <sup>39</sup>                          | √                  | √ | √                              | √ |
| Brain/CNS impairment                                                                 | Glasgow Coma Scale <sup>19</sup>                                                                                                                               | √                  |   |                                |   |
| <b>Psychosocial features</b>                                                         |                                                                                                                                                                |                    |   |                                |   |
| Anxiety and depression                                                               | Hospital Anxiety and Depression Scales [HADS] <sup>40</sup>                                                                                                    | √                  | √ | √                              | √ |
| Coping strategies applied during a painful experience                                | Coping Strategies Questionnaire-24 [CSQ-24] <sup>41</sup>                                                                                                      | √                  | √ | √                              | √ |
| Fear of movement or fear of injury or re-injury during movement                      | Tampa Scale of Kinesiophobia, 11-item [TSK-11] <sup>42</sup>                                                                                                   | √                  | √ | √                              | √ |
| Confidence in ability to perform activities despite pain                             | Pain Self-Efficacy Questionnaire <sup>43</sup>                                                                                                                 | √                  | √ | √                              | √ |
| Subjective post-traumatic distress                                                   | Impact of Event Scale revised [IES-R] <sup>44</sup>                                                                                                            | √                  | √ | √                              | √ |

| <b>Injury characteristics</b>                    |                                                                                                                                                                   |                |   |   |   |
|--------------------------------------------------|-------------------------------------------------------------------------------------------------------------------------------------------------------------------|----------------|---|---|---|
| Time of injury/incident                          | Hospital record data                                                                                                                                              | √              |   |   |   |
| Injury location                                  | Adapted pain drawings, based on hospital record data                                                                                                              | √              |   |   |   |
| Tissues damaged                                  | Based on imaging data and hospital records<br>Fractures<br>Penetrating / non-penetrating injury / both                                                            | √              |   |   |   |
| Surgery required                                 | Location and post-injury timing of surgery, based on hospital record data                                                                                         | √              |   |   |   |
| Assisted mechanical ventilation required         | Yes / no / duration                                                                                                                                               | √              |   |   |   |
| Severity of injury                               | Injury Severity Scale <sup>45</sup>                                                                                                                               | √              |   |   |   |
| <b>Pain characteristics</b>                      |                                                                                                                                                                   |                |   |   |   |
| Chronic pain severity                            | Chronic Pain Grade Scale <sup>21</sup>                                                                                                                            |                |   | √ | √ |
| Pain intensity                                   | 11-point [0-10] Numerical Rating Scale, relating to current pain, from 'no pain' to 'pain as bad as could be' [collected as part of the Chronic Pain Grade Scale] | √ <sup>1</sup> | √ | √ | √ |
| Pain medication intake [type, dosage and timing] | Medication Quantification Scale, <sup>46-48</sup> based on hospital record data                                                                                   | √ <sup>1</sup> |   |   |   |
| Pain location                                    | Pain drawing                                                                                                                                                      | √ <sup>1</sup> | √ | √ | √ |
| Pain extent                                      | Electronic pain drawing <sup>49</sup>                                                                                                                             | √ <sup>1</sup> |   |   |   |
| Self-reported features of neuropathic pain       | painDETECT questionnaire <sup>50</sup>                                                                                                                            | √ <sup>1</sup> | √ | √ | √ |
| <b>Quantitative sensory testing</b>              |                                                                                                                                                                   |                |   |   |   |
| Heat pain threshold                              | Evaluation of pain threshold using a heat stimulus                                                                                                                | √ <sup>1</sup> |   |   |   |
| Cold pain threshold                              | Evaluation of pain threshold using a cold stimulus                                                                                                                | √ <sup>1</sup> |   |   |   |
| Pressure pain threshold                          | Evaluation of pain threshold using a pressure stimulus                                                                                                            | √ <sup>1</sup> |   |   |   |
| Temporal summation                               | Evaluation of pain intensity in response to repetitive pressure stimuli                                                                                           | √ <sup>1</sup> |   |   |   |
| <b>Biomarkers</b>                                |                                                                                                                                                                   |                |   |   |   |
| C-reactive protein [CRP]                         | Serum levels of CRP, a broad indicator of inflammation [via blood analysis]                                                                                       | √ <sup>2</sup> |   |   |   |
| Cell-free DNA [cfDNA]                            | Plasma levels of cell-free [nuclear and mitochondrial] DNA, indicators of tissue damage [via blood analysis]                                                      | √ <sup>2</sup> |   |   |   |

<sup>1</sup> Measurements to be taken repeatedly throughout the baseline period, which will commence immediately following recruitment via informed consent [up to 14 days post-trauma] for a period of up to 14 days [i.e. until a maximum of 28 days post-trauma], whilst the participant is in hospital

<sup>2</sup> Measurements to be taken repeatedly throughout the baseline period, but may be commenced prior to this, subject to assent from a legal consultee

## Data handling

1  
2  
3  
4  
5 Blood samples will be collected through the clinical and research nurse teams, whilst  
6  
7 the participant is in the hospital, and either analysed immediately [C-reactive protein] or  
8  
9 securely stored for subsequent analysis [cell-free DNA]. Baseline self-reported  
10  
11 questionnaires, pain and injury drawings, and physical assessments will be collected by one  
12  
13 of three trained assessors from the study team. Inter-rater reliability studies [across 2  
14  
15 assessors] will first be conducted in both healthy and trauma populations to inform definitive  
16  
17 testing protocols. The order of physical assessment data collection will be randomly assigned  
18  
19 [using computerised randomisation software] according to the modality of testing and by site,  
20  
21 to prevent order effects. Follow-up self-reported questionnaires will be posted to participants  
22  
23 at their home addresses; with up to two postal reminders and a telephone call for non-  
24  
25 response. All questionnaires will be formatted so that data can be scanned or entered directly  
26  
27 into an electronic database. Following data entry, data will be checked by a second researcher  
28  
29 for completeness and accuracy. In addition, regular audits of data collection and storage will  
30  
31 be performed by an independent study management committee. Participant identifiable  
32  
33 information will be securely stored within the hospital, in line with current United Kingdom  
34  
35 data protection legislation, and only accessible by the site Principal Investigator and Research  
36  
37 Nurse team who will not be involved in data analysis. All outcome measure data will be  
38  
39 securely transferred within an anonymised database file to physically secure servers at the  
40  
41 University of Birmingham, and stored for a period of 10-years in line with Research  
42  
43 Governance procedures. Participants will receive usual care, and interventions received will  
44  
45 be recorded for descriptive analysis. Anonymised data will be analysed using IBM SPSS  
46  
47 Statistics.  
48  
49  
50  
51  
52  
53  
54

## 55 **Sample size**

56  
57  
58  
59  
60

1  
2  
3  
4  
5 In predictive modelling, a larger sample size enables lower bias and variance, and  
6  
7 permits the prospective prediction of new observations.<sup>15</sup> The number of predictors will be  
8  
9 reduced using exploratory factor analysis. This process will ensure that the sample size  
10  
11 provides at least 10 cases per candidate predictor, to adequately power the final regression  
12  
13 analysis.<sup>51 52</sup> Data will be collected for an estimated 300 participants per cohort [n=600 total]  
14  
15 to allow for withdrawals [primarily expected deaths within the first 3 months] and losses to  
16  
17 follow-up, so that final data are available for 250 participants per cohort [n=500 total].  
18  
19  
20  
21

### 22 **Statistical analysis methods and management of missing data**

23  
24  
25

26 For each cohort, potentially eligible patients, numbers examined for eligibility,  
27  
28 confirmed eligible, recruited into the study, completing follow-up, and analysed will be  
29  
30 reported in a flow diagram. Reasons for non-participation, exclusion, drop-outs and  
31  
32 withdrawal [e.g. death] will be reported at each stage. Participant characteristics will be  
33  
34 descriptively presented. For each variable of interest, the number of participants with  
35  
36 missing data will be reported.  
37  
38  
39  
40

41 For the first cohort to develop the predictive model, an initial exploratory data analysis stage  
42  
43 will summarise the data.<sup>15</sup> Correlations between candidate predictive factors will be  
44  
45 calculated at baseline. Outcome [CPGS] scores will be dichotomised into good and poor  
46  
47 categories as described previously. Data reduction will use exploratory factor analysis to  
48  
49 assess factor loading of candidate predictors [summary scores] on poor outcome at 6 months.  
50  
51 This will enable the number of candidate predictors entered into the final model to be reduced  
52  
53 to 25, which can be supported by the cohort sample of 250. This process reduces the risk of  
54  
55  
56  
57  
58  
59  
60

1  
2  
3 over-fitting the model and the risk of selecting the wrong variables due to correlation between  
4  
5 predictor variables [multicollinearity].<sup>53</sup>  
6  
7  
8  
9

10 Statistical modelling for prediction has been planned *a priori*. To explore the  
11 influence of each predictive factor on poor outcome at 6 months, a logistic multivariable  
12 regression model will be fitted to the dichotomised outcome scores to calculate low and high  
13 risk of poor outcome. Odds ratios for each candidate predictive factor will be reported,  
14 adjusted for other factors and account for clustering [e.g. level of injury severity]. If  
15 necessary, multiple imputation<sup>54</sup> will be used to deal with missing outcome data. The  
16 characteristics of those patients with and without 6-month data will also be compared, to  
17 inform whether patients with no 6-month data were missing at random. Reduced  
18 multivariable analyses will be considered if necessary [e.g. removing one of two candidate  
19 predictive factors that are highly correlated at baseline], to examine the robustness of the  
20 conclusions.  
21  
22  
23  
24  
25  
26  
27  
28  
29  
30  
31  
32  
33  
34  
35

### 36 **Risk groups and development of the predictive screening tool**

37  
38  
39

40 The predictive model will be used to develop a risk stratification tool to inform an  
41 individual's absolute risk of poor outcome. The stratification tool will inform clinical  
42 decision-making for precision rehabilitation. Items will be selected for the model if they are  
43 statistically significantly [ $p < 0.05$ ] associated with poor outcome in the logistic regression  
44 analysis, and those deemed clinically important to retain using expert opinion [regardless of  
45 statistical significance, study steering group] to improve face validity for clinicians and avoid  
46 over-fitting of the model.<sup>53</sup> The regression model with included predictive factors will be  
47 fitted to the data from the first of the two cohorts to obtain a final set of parameter estimates  
48  
49  
50  
51  
52  
53  
54  
55  
56  
57  
58  
59  
60

1  
2  
3 [i.e. alpha and beta terms], which will be used to form the model. An important requirement  
4 of the stratification tool is that it should be sufficiently brief to facilitate use in clinical  
5 practice. Thus, we will look to simplify the model where possible to facilitate its use, but  
6 without important reduction in its predictive ability in terms of calibration and discrimination.  
7 For example, if multi-item questionnaire scores are included in the model, then we will  
8 evaluate whether just one of the questionnaire items is sufficient. Ideally, this process will  
9 result in a full and simplified model.  
10  
11  
12  
13  
14  
15  
16  
17  
18  
19

### 20 **Development versus validation**

21  
22  
23  
24 For validation of the model, data from the second of the two cohorts will be compared  
25 to that of the first to enable analysis of the distribution of important variables; inclusive of  
26 demographic, predictor and outcome variables. The predictive performance of the screening  
27 tool [discrimination, calibration, and goodness of fit] will be assessed using data from the  
28 second cohort. Data in both cohorts will be consistent in terms of setting, eligibility criteria,  
29 outcome, and predictors.  
30  
31  
32  
33  
34  
35  
36  
37  
38

### 39 **DISCUSSION**

40  
41  
42  
43  
44 There is an urgent need for a robust predictive study to predict the transition from  
45 acute to chronic pain in a musculoskeletal trauma population. Using such a comprehensive  
46 array of outcome measures will allow the development and validation of a predictive tool to  
47 predict development of chronic and disabling pain, and begin the process of identifying  
48 appropriate and precision interventions.  
49  
50  
51  
52  
53  
54  
55  
56  
57  
58  
59  
60

1  
2  
3 The candidate predictors used in this study have been chosen to be as comprehensive  
4 as possible, based on current knowledge of pain science. Other candidate predictors were  
5 considered [e.g. microRNA biomarkers], but their mechanistic functions and temporal  
6 progression are not yet sufficiently clear to justify the expense of their inclusion. The  
7 combination of patient reported outcome measures, psychophysical testing and biomarkers  
8 that are included are designed to act as surrogates for the four primary mechanisms of pain:<sup>55</sup>  
9  
10  
11  
12  
13  
14  
15  
16  
17  
18  
19  
20  
21  
22  
23  
24  
25  
26  
27  
28  
29  
30  
31  
32  
33  
34  
35  
36  
37  
38  
39  
40  
41  
42  
43  
44  
45  
46  
47  
48  
49  
50  
51  
52  
53  
54  
55  
56  
57  
58  
59  
60  
<sup>56 8</sup> *nociceptive* [injury location, severity and characteristics], *neuropathic* [painDETECT tool  
and pain extent, *inflammatory* [biomarkers], and *nociplastic* [quantitative sensory testing,  
painDETECT and pain location and extent]. In addition, other patient-reported outcome  
measures [e.g. pain intensity, post-traumatic stress, anxiety and depression, coping, and pain  
self-efficacy] are included as the domains that they measure have been shown to influence  
prognosis for long-term outcomes in populations with pain in a range of locations.<sup>9 23 24</sup>

31  
32  
33  
34  
35  
36  
37  
38  
39  
40  
41  
42  
43  
44  
45  
46  
47  
48  
49  
50  
51  
52  
53  
54  
55  
56  
57  
58  
59  
60  
Rehabilitation is widely regarded as an important component of post-trauma  
healthcare;<sup>57</sup> however, the current position of equipoise means that precision rehabilitation  
has not yet been identified. Understanding mechanisms that underlie the transition from acute  
to chronic pain is essential to moving beyond this position. Identifying predictive factors  
related to poor outcome of pain and disability outcome will facilitate targeting of effective  
interventions. This will inform rehabilitation decision making, and facilitate improvements in  
clinical and cost effectiveness of rehabilitation interventions.

48  
49  
50  
51  
52  
53  
54  
55  
56  
57  
58  
59  
60  
Limited research has identified criteria for quality in a predictive model, but authors  
have identified potential quality issues to ensure methodological rigour.<sup>58</sup> These issues are  
summarised in Table 2 and incorporated into the study design to ensure low risk of bias in  
development and validation of the predictive model.

**Table 2: Methodological decisions to improve study quality**

| Criteria <sup>58</sup>                                       | Methodological decisions to improve quality                                                                                                                                                                                                    |
|--------------------------------------------------------------|------------------------------------------------------------------------------------------------------------------------------------------------------------------------------------------------------------------------------------------------|
| <b>Study design</b>                                          |                                                                                                                                                                                                                                                |
| Inception cohort                                             | <ul style="list-style-type: none"> <li>• Clear description of population</li> <li>• Clear description of the participants at baseline</li> </ul>                                                                                               |
| Source population                                            | <ul style="list-style-type: none"> <li>• Clear description of population</li> <li>• Clear description of sampling frame and recruitment [method and timing]</li> </ul>                                                                         |
| Inclusion and exclusion criteria                             | <ul style="list-style-type: none"> <li>• Clarity of eligibility criteria</li> </ul>                                                                                                                                                            |
| Prospective design                                           | <ul style="list-style-type: none"> <li>• Clarity of study design</li> </ul>                                                                                                                                                                    |
| <b>Study attrition</b>                                       |                                                                                                                                                                                                                                                |
| Number of drop-outs                                          | <ul style="list-style-type: none"> <li>• Adequate participation rate</li> <li>• Clear description of attempts to collect information on participants who dropped out</li> <li>• Reporting numbers and reasons for loss to follow-up</li> </ul> |
| Information provided on method of management of missing data | <ul style="list-style-type: none"> <li>• Appropriate methods of imputation of missing data</li> </ul>                                                                                                                                          |
| <b>Predictive factors</b>                                    |                                                                                                                                                                                                                                                |
| All predictive factors described used to develop the model   | <ul style="list-style-type: none"> <li>• Clear definition of predictive factors</li> <li>• An adequate proportion of participants has complete data for the predictive factor</li> </ul>                                                       |
| Standardised or valid measurements                           | <ul style="list-style-type: none"> <li>• The measurement of the predictive factor is reliable and valid</li> <li>• The measurement of the predictive factor is the same for all participants</li> </ul>                                        |
| Linearity assumption studied                                 | <ul style="list-style-type: none"> <li>• Linearity of data will be reported</li> </ul>                                                                                                                                                         |
| No dichotomization of predictive variables                   | <ul style="list-style-type: none"> <li>• Continuous variables will be reported where possible</li> </ul>                                                                                                                                       |
| Data presentation all predictive factors                     | <ul style="list-style-type: none"> <li>• Complete data will be presented</li> </ul>                                                                                                                                                            |
| <b>Outcome measures</b>                                      |                                                                                                                                                                                                                                                |
| Description of outcome measures                              | <ul style="list-style-type: none"> <li>• The outcome is clearly defined</li> </ul>                                                                                                                                                             |
| Standardised or valid measurements                           | <ul style="list-style-type: none"> <li>• The measurement of the outcome is reliable and valid</li> <li>• The measurement of the outcome is the same for all participants</li> </ul>                                                            |
| Data presentation of most important outcome measures         | <ul style="list-style-type: none"> <li>• Complete data will be presented</li> </ul>                                                                                                                                                            |
| <b>Analysis</b>                                              |                                                                                                                                                                                                                                                |
| Presentation of univariate crude estimates                   | <ul style="list-style-type: none"> <li>• An appropriate strategy for model building is described</li> <li>• An adequate statistical model described</li> </ul>                                                                                 |
| Sufficient numbers of subjects per variable                  | <ul style="list-style-type: none"> <li>• Adequate data will be presented</li> </ul>                                                                                                                                                            |
| Selection method of variables explained                      | <ul style="list-style-type: none"> <li>• Sufficient data will be presented to enable assessment of the adequacy of the analytic strategy</li> </ul>                                                                                            |

|                                        |                                                                                                                                                                |
|----------------------------------------|----------------------------------------------------------------------------------------------------------------------------------------------------------------|
|                                        | <ul style="list-style-type: none"> <li>• All results will be reported</li> </ul>                                                                               |
| Presentation of multivariate estimates | <ul style="list-style-type: none"> <li>• An appropriate strategy for model building is described</li> <li>• An adequate statistical model described</li> </ul> |
| <b>Clinical performance / validity</b> |                                                                                                                                                                |
| Clinical performance                   | <ul style="list-style-type: none"> <li>• Clinical performance of the model will be reported</li> </ul>                                                         |
| Internal validation                    | <ul style="list-style-type: none"> <li>• Internal validation will be reported</li> </ul>                                                                       |
| External validation                    | Not a focus of this study                                                                                                                                      |

## ETHICS AND DISSEMINATION

The project has been approved by a NHS Research Ethics Committee (17/WA/0421).

### Patient burden and potential distress

The primary ethical concern is to limit distress on participants. As such, to reduce the patient burden when collecting baseline data, the self-reported questionnaires will be administered by members of the study team shortly following obtaining fully informed consent, and physical assessment outcomes will be measured at least 24 hours later. Patients will be asked to consent to not only providing new data for the study, but also for the study team to access information that will have been routinely collected by the hospital staff since the time of admission [e.g. nature and circumstances of injury, previous medical history, medication details, blood test results]. This will be fully explained to patients and explicitly detailed in the participant information sheet.

### Mental capacity

1  
2  
3 Because of the nature of their injuries, the patient's mental capacity will be assessed  
4 on admission into hospital and thereafter by clinical staff and/or research nurses. The mental  
5 capacity of eligible patients at the time of being approached for recruitment will therefore fall  
6 into one of two groups: either they possess or are lacking mental capacity [in accordance with  
7 the Mental Capacity Act 2005] to provide informed consent to voluntarily participate in the  
8 study.  
9  
10  
11  
12  
13  
14  
15  
16  
17

18 For patients possessing mental capacity to provide consent, a research nurse or  
19 member of the research team will ask if they are interested in participating in the study. If  
20 they are interested, a copy of the participant information sheet will be provided [and if  
21 necessary read to them] to give them an outline of the study. Following an opportunity to  
22 seek additional information and ask questions, the patient will be asked if they wish to  
23 provide their written informed consent to participate in the study, at which point a consent  
24 form will need to be signed.  
25  
26  
27  
28  
29  
30  
31  
32  
33  
34

35 On admission to the hospital, an otherwise eligible patient may lack the mental  
36 capacity to decide whether to provide consent to participate in a research study [e.g. due to  
37 the severity of their injuries, because they are arriving intubated and ventilated, or as a side-  
38 effect of medication for their injuries]. They may or may not regain this capacity during their  
39 stay in the hospital. Due to our wish to begin measuring biomarkers as early as possible  
40 following the onset of trauma, for some otherwise eligible patients it would be necessary to  
41 take blood samples before the patient has regained the capacity to provide informed consent.  
42 Using the convention of previous studies in trauma populations,<sup>59</sup> recruitment into the study  
43 will be undertaken under the provision and guidance of the Mental Capacity Act 2005 for  
44 research in emergency situations, and in accordance with the Declaration of Helsinki. As  
45  
46  
47  
48  
49  
50  
51  
52  
53  
54  
55  
56  
57  
58  
59  
60

1  
2  
3 such, if a patient does not possess this capacity when first approached for recruitment, the  
4  
5 research team will request a mandate to collect blood samples from a legal consultee. This  
6  
7 mandate can continue until the patient gains sufficient capacity to make an informed decision  
8  
9 as to whether they wish to provide consent or not. We will use this mandate up to 14 days  
10  
11 from the date of the trauma. If the patient does not regain capacity within 14 days following  
12  
13 the trauma, or if informed consent is not provided by the patient once capacity to do so is  
14  
15 regained, any samples collected will be destroyed before any non-clinical biomarker analysis  
16  
17 [i.e. cell-free DNA] is performed. Furthermore, only once informed consent has been gained  
18  
19 from the patient would the research team proceed to collect any self-reported questionnaire or  
20  
21 physical assessment data. The legal consultee can either be a 'personal consultee' e.g. family  
22  
23 member, or a 'nominated consultee' e.g. intensive care consultant. Once a consultee [personal  
24  
25 or nominated] has been identified, they will be provided with the participant information  
26  
27 sheet, to inform them about the study. The consultee will be asked if they feel participating in  
28  
29 the study would be something to which the patient would agree or object to. If, in their  
30  
31 opinion, the patient would agree to participating in the study, the consultee will be asked to  
32  
33 sign a declaration form, and the research team can begin the schedule of blood sample  
34  
35 collections. If, at any time prior to the patient regaining capacity, the consultee decides to  
36  
37 withdraw assent, then no further samples will be collected until the patient can be approached  
38  
39 for formal recruitment [if appropriate].  
40  
41  
42  
43  
44  
45

#### 46 Other ethical issues

47  
48  
49

50 Participants will be informed that they are free to withdraw from the study at any  
51  
52 time, without needing to provide reason. At each data collection visit, the capacity of the  
53  
54 participant will be checked [using an Abbreviated Mental Test] and asked if they are happy to  
55  
56  
57  
58  
59  
60

1  
2  
3 proceed with data collection. Any concerns for a participant by the study team will be fed  
4  
5 back to clinical staff. All blood samples will be collected by hospital staff and the research  
6  
7 nurse team and will be stored, tested and disposed of in accordance with current United  
8  
9 Kingdom guidelines and regulations. In the event of death within 3 months of being recruited,  
10  
11 participants will be automatically withdrawn from the study and the primary predictive  
12  
13 analysis. Baseline characteristics of withdrawn participants will be compared to those of  
14  
15 retained participants to assess for any differences.  
16  
17  
18  
19  
20  
21  
22  
23  
24  
25  
26  
27  
28  
29  
30  
31  
32  
33  
34  
35  
36  
37  
38  
39  
40  
41  
42  
43  
44  
45  
46  
47  
48  
49  
50  
51  
52  
53  
54  
55  
56  
57  
58  
59  
60

Or peer review only

## REFERENCES

1. Berben SA, Schoonhoven L, Meijs TH, et al. Prevalence and relief of pain in trauma patients in emergency medical services. *Clin J Pain* 2011;27(7):587-92. doi: 10.1097/AJP.0b013e3182169036
2. Williamson OD, Epi GD, Gabbe BJ, et al. Predictors of moderate or severe pain 6 months after orthopaedic injury: a prospective cohort study. *J Orthop Trauma* 2009;23(2):139-44. doi: 10.1097/BOT.0b013e3181962e29
3. Mannion RJ, Woolf CJ. Pain mechanisms and management: a central perspective. *Clin J Pain* 2000;16(3 Suppl):S144-56.
4. Holbrook TL, Anderson JP, Sieber WJ, et al. Outcome after major trauma: discharge and 6-month follow-up results from the Trauma Recovery Project. *J Trauma* 1998;45(2):315-23; discussion 23-4.
5. Holbrook TL, Anderson JP, Sieber WJ, et al. Outcome after major trauma: 12-month and 18-month follow-up results from the Trauma Recovery Project. *J Trauma* 1999;46(5):765-71; discussion 71-3.
6. Harris IA, Young JM, Rae H, et al. Predictors of general health after major trauma. *J Trauma* 2008;64(4):969-74. doi: 10.1097/01.ta.0000245972.83948.1a
7. Ponsford J, Hill B, Karamitsios M, et al. Factors influencing outcome after orthopedic trauma. *J Trauma* 2008;64(4):1001-9. doi: 10.1097/TA.0b013e31809fec16
8. Vardeh D, Mannion RJ, Woolf CJ. Toward a Mechanism-Based Approach to Pain Diagnosis. *J Pain* 2016;17(9 Suppl):T50-69. doi: 10.1016/j.jpain.2016.03.001
9. Artus M, Campbell P, Mallen CD, et al. Generic prognostic factors for musculoskeletal pain in primary care: a systematic review. *BMJ Open* 2017;7(1):e012901. doi: 10.1136/bmjopen-2016-012901
10. Latremoliere A, Woolf CJ. Central sensitization: a generator of pain hypersensitivity by central neural plasticity. *J Pain* 2009;10(9):895-926. doi: 10.1016/j.jpain.2009.06.012
11. Linley JE, Rose K, Ooi L, et al. Understanding inflammatory pain: ion channels contributing to acute and chronic nociception. *Pflugers Arch* 2010;459(5):657-69. doi: 10.1007/s00424-010-0784-6
12. Woolf CJ. Central sensitization: implications for the diagnosis and treatment of pain. *Pain* 2011;152(3):S2-15.
13. Altman DG, Vergouwe Y, Royston P, et al. Prognosis and prognostic research: validating a prognostic model. *BMJ* 2009;338(338):b605. doi: 10.1136/bmj.b605
14. Moons KG, Kengne AP, Grobbee DE, et al. Risk prediction models: II. External validation, model updating, and impact assessment. *Heart* 2012;98(9):691-8. doi: 10.1136/heartjnl-2011-301247
15. Shmueli G. To explain or to predict? *Statistical Science* 2010;25(3):289-310.
16. Collins GS, Reitsma, J.B., Altman, D.G. and Moons, K.G., . Transparent reporting of a multivariable prediction model for individual prognosis or diagnosis (TRIPOD): the TRIPOD statement. *BMC Medicine* 2015;13(1)
17. Merskey H Bogduk N. Classification of chronic pain : descriptions of chronic pain syndromes and definitions of pain terms. USA: IASP Press 1994.
18. Hodgkinson HM. Evaluation of a mental test score for assessment of mental impairment in the elderly. *Age and Ageing* 1972;1(4):233-8.
19. Teasdale G, Jennett B. Assessment of coma and impaired consciousness. A practical scale. *Lancet* 1974;2(7872):81-4.
20. Reith FC, Van den Brande R, Synnot A, et al. The reliability of the Glasgow Coma Scale: a systematic review. *Intensive Care Med* 2016;42(1):3-15. doi: 10.1007/s00134-015-4124-3

- 1
- 2
- 3 21. Von Korff M, Ormel J, Keefe FJ, et al. Grading the severity of chronic pain. *Pain* 1992;50(2):133-
- 4 49.
- 5 22. Parsons S, Breen A, Foster NE, et al. Prevalence and comparative troublesomeness by age of
- 6 musculoskeletal pain in different body locations. *Fam Pract* 2007;24(4):308-16. doi:
- 7 10.1093/fampra/cmm027
- 8 23. Muller S, Thomas E, Dunn KM, et al. A prognostic approach to defining chronic pain across a
- 9 range of musculoskeletal pain sites. *Clin J Pain* 2013;29(5):411-6. doi:
- 10 10.1097/AJP.0b013e318257099e
- 11 24. Rivara FP, Mackenzie EJ, Jurkovich GJ, et al. Prevalence of pain in patients 1 year after major
- 12 trauma. *Arch Surg* 2008;143(3):282-7; discussion 88. doi: 10.1001/archsurg.2007.61
- 13 25. Organization WH. The International Classification of Functioning, Disability and Health (ICF).
- 14 Geneva: WHO 2001.
- 15 26. Dixon D PD, Johnston M. What does the chronic pain grade questionnaire measure? *Pain*
- 16 2007;130:249-53.
- 17 27. Smith BH, Penny KI, Purves AM, et al. The Chronic Pain Grade questionnaire: validation and
- 18 reliability in postal research. *Pain* 1997;71(2):141-7.
- 19 28. Penny KI PA, Smith BH, Chambers WA, Smith WC. Relationship between the chronic pain grade
- 20 and measures of physical, social and psychological well-being. *pain* 1999;79:275-9.
- 21 29. Elliott AM SB, Smith WC, Chambers WA. Changes in chronic pain severity over time: The Chronic
- 22 Pain Grade as a valid measure. *Pain* 2000;88:303.
- 23 30. Von Korff M, Jensen MP, Karoly P. Assessing global pain severity by self-report in clinical and
- 24 health services research. *Spine (Phila Pa 1976)* 2000;25(24):3140-51.
- 25 31. Von Korff M, Miglioretti DL. A prognostic approach to defining chronic pain. *Pain*
- 26 2005;117(3):304-13. doi: 10.1016/j.pain.2005.06.017
- 27 32. Von Korff M, Dunn KM. Chronic pain reconsidered. *Pain* 2008;138(2):267-76. doi:
- 28 10.1016/j.pain.2007.12.010
- 29 33. Dunn KM, Croft PR, Main CJ, et al. A prognostic approach to defining chronic pain: replication in a
- 30 UK primary care low back pain population. *Pain* 2008;135(1-2):48-54. doi:
- 31 10.1016/j.pain.2007.05.001
- 32 34. Thomas E, Dunn KM, Mallen C, et al. A prognostic approach to defining chronic pain: application
- 33 to knee pain in older adults. *Pain* 2008;139(2):389-97. doi: 10.1016/j.pain.2008.05.010
- 34 35. Eriksen HR, Ihlebaek C, Ursin H. A scoring system for subjective health complaints (SHC). *Scand J*
- 35 *Public Health* 1999;27(1):63-72.
- 36 36. Ware J. SF-36 Health Survey Updated. *Spine* 2000;25(24):3130-39.
- 37 37. Brooks R. EuroQol: the current state of play. *Health Policy* 1996;37(1):53-72.
- 38 38. Mahoney FI, Barthel DW. Functional Evaluation: The Barthel Index. *Md State Med J* 1965;14:61-5.
- 39 39. Cappelleri JC BA, McDermott AM, Sadosky AB, Petrie CD, Martin S. Psychometric properties of a
- 40 single-item scale to assess sleep quality among individuals with fibromyalgia. *Health Qual*
- 41 *Life Outcomes* 2009;17(7):54.
- 42 40. Zigmond AS, Snaith RP. The hospital anxiety and depression scale. *Acta Psychiatr Scand*
- 43 1983;67(6):361-70.
- 44 41. Harland NJ, Georgieff K. Development of the coping strategies questionnaire 24, a clinically
- 45 utilitarian version of the coping strategies questionnaire. *Rehabilitation Psychology*
- 46 2003;48(4):296-300.
- 47 42. Woby SR, Roach NK, Urmston M, et al. Psychometric properties of the TSK-11: a shortened
- 48 version of the Tampa Scale for Kinesiophobia. *Pain* 2005;117(1-2):137-44. doi:
- 49 10.1016/j.pain.2005.05.029
- 50 43. Nicholas MK. The pain self-efficacy questionnaire: Taking pain into account. *Eur J Pain*
- 51 2007;11(2):153-63.
- 52
- 53
- 54
- 55
- 56
- 57
- 58
- 59
- 60

- 1  
2  
3 44. Beck JG, Grant DM, Read JP, et al. The impact of event scale-revised: psychometric properties in  
4 a sample of motor vehicle accident survivors. *J Anxiety Disord* 2008;22(2):187-98. doi:  
5 10.1016/j.janxdis.2007.02.007
- 6 45. Baker SP, O'Neill B, Haddon W, Jr., et al. The injury severity score: a method for describing  
7 patients with multiple injuries and evaluating emergency care. *J Trauma* 1974;14(3):187-96.
- 8 46. Masters Steedman S, Middaugh SJ, Kee WG, et al. Chronic-pain medications: equivalence levels  
9 and method of quantifying usage. *Clin J Pain* 1992;8(3):204-14.
- 10 47. Harden RN, Weinland SR, Remble TA, et al. Medication Quantification Scale Version III: update in  
11 medication classes and revised detriment weights by survey of American Pain Society  
12 Physicians. *J Pain* 2005;6(6):364-71. doi: 10.1016/j.jpain.2005.01.350
- 13 48. Gallizzi M GC, Harden RN, Stanos S, Khan A. Medication Quantification Scale Version III: internal  
14 validation of detriment weights using a chronic pain population. *Pain Pract* 2008;8(1):1-4.
- 15 49. Barbero M, Mores, F., Leoni, D., Gatti, R., Egloff, M., Falla, D. Test-retest reliability of pain extent  
16 and pain location using a novel method for pain drawing analysis. *European Journal of Pain*  
17 2015;19:1129-38.
- 18 50. Freynhagen R, Baron R, Gockel U, et al. painDETECT: a new screening questionnaire to identify  
19 neuropathic components in patients with back pain. *Curr Med Res Opin* 2006;22(10):1911-  
20 20. doi: 10.1185/030079906X132488
- 21 51. Peduzzi P, Concato J, Kemper E, et al. A simulation study of the number of events per variable in  
22 logistic regression analysis. *J Clin Epidemiol* 1996;49(12):1373-9.
- 23 52. Vittinghoff E, McCulloch CE. Relaxing the rule of ten events per variable in logistic and Cox  
24 regression. *Am J Epidemiol* 2007;165(6):710-8. doi: 10.1093/aje/kwk052
- 25 53. Sainani KL. Multivariate Regression: The Pitfalls of Automated Variable Selection. *Physical*  
26 *Medicine and Rehabilitation* 2013;5:791-94,.
- 27 54. Sterne JA, White IR, Carlin JB, et al. Multiple imputation for missing data in epidemiological and  
28 clinical research: potential and pitfalls. *BMJ* 2009;338:b2393. doi: 10.1136/bmj.b2393
- 29 55. Woolf CJ, Bennett GJ, Doherty M, et al. Towards a mechanism-based classification of pain? *Pain*  
30 1998;77(3):227-9.
- 31 56. Kosek E CM, Baron R, Gebhart GF, Mico JA, Rice AS, Rief W, Sluka AK. Do we need a third  
32 mechanistic descriptor for chronic pain states? *Pain* 2016;157(7):1382-6.
- 33 57. NICE. Rehabilitation after critical illness in adults Clinical guideline [CG83]. 2009
- 34 58. van Oort L, van den Berg T, Koes BW, et al. Preliminary state of development of prediction  
35 models for primary care physical therapy: a systematic review. *J Clin Epidemiol*  
36 2012;65(12):1257-66. doi: 10.1016/j.jclinepi.2012.05.007
- 37 59. Hazeldine J, Naumann DN, Toman E, et al. Prehospital immune responses and development of  
38 multiple organ dysfunction syndrome following traumatic injury: A prospective cohort study.  
39 *PLoS Med* 2017;14(7):e1002338. doi: 10.1371/journal.pmed.1002338
- 40  
41  
42  
43  
44

#### 45 **Authors' contributions**

46 DF is Chief Investigator and guarantor. DF and AR led protocol development are leading  
47 data analysis and dissemination. DE is the Research Fellow with responsibility for study  
48 management. NM is a Doctoral Researcher focused to this study. NH is the lead for Patient  
49 and Public Involvement. JP is the Principal Investigator at the Major Trauma Centre. JP and  
50  
51 CS are clinical representatives at the Major Trauma Centre. JL is the lead for biomarker  
52  
53  
54  
55  
56  
57

1  
2  
3 evaluation. All authors will contribute to data interpretation, conclusions, and dissemination.

4 AR drafted the initial manuscript with DF. Subsequent drafts were developed with DE. All

5  
6  
7 reviewers have read, contributed to, and agreed upon the final manuscript.  
8  
9

### 10 11 **Funding statement** 12

13  
14  
15 This work was supported by the National Institute for Health Research Surgical  
16  
17 Reconstruction and Microbiology Research Centre [NIHR SRMRC] to DF and AR.  
18  
19

### 20 21 22 **Competing interests** 23

24 There are no competing interests.  
25  
26

### 27 28 29 **Data sharing statement** 30

31 No additional data are available.  
32  
33  
34  
35  
36  
37  
38  
39  
40  
41  
42  
43  
44  
45  
46  
47  
48  
49  
50  
51  
52  
53  
54  
55  
56  
57  
58  
59  
60

1  
2  
3  
4  
5  
6  
7  
8  
9  
10  
11  
12  
13  
14  
15  
16  
17  
18  
19  
20  
21  
22  
23  
24  
25  
26  
27  
28  
29  
30  
31  
32  
33  
34  
35  
36  
37  
38  
39  
40  
41  
42  
43  
44  
45  
46  
47  
48  
49  
50  
51  
52  
53  
54  
55  
56  
57  
58  
59  
60



Study design

500x521mm (300 x 300 DPI)

## Supplementary file 1. Candidate predictors

### *General participant characteristics*

Several participant demographic features will be recorded at baseline, based on available hospital records and patient self-reported recollection, including smoking status, age, gender, height and weight to calculate body mass index [BMI], education [highest attained educational level], employment status [at the time of trauma], circumstance of trauma [military or civilian], previous history of musculoskeletal pain and injury, comorbidity of other current health problems.

### *Quality of life and physical functioning*

#### 36-Item Short Form Health Survey, Version 2.0 [SF-36v2]

The SF-36v2 is a self-reported measure of health-related quality of life, modified from the original SF-36, which was developed as part of the Medical Outcomes Study.<sup>1</sup> The 36-item questionnaire has subscales that assess physical function, social and psychological wellbeing.<sup>2 3</sup> The scores can be divided into physical and mental component summary scales.<sup>4</sup> The SF-36 has been shown to be valid and has been tested extensively in a trauma population.<sup>5</sup> Ware<sup>6</sup> reports multiple studies showing internal consistency above 0.70, with physical and mental scores exceeding 0.90. Minimal clinically important difference has been reported as 5.5 in a musculoskeletal trauma population.<sup>7</sup> Introduced in 1996, version 2.0 of the SF-36 is comparable to the original, retaining all subscales, with improvements to layout, presentation, response scales, wording and scoring.<sup>6</sup> The 'acute' [1 week recall period] version will be used, since the 4 week recall would not be appropriate for post-injury recall at baseline.

### EuroQol Five Dimension Scale, 5-level [EQ-5D-5L]

Health-related quality of life will be quantified using the EQ-5D-5L through which 243 possible health states are converted to a single index value of range 0 to 1 where 1 is perfect health, and a visual analogue scale range 0–100, representing ‘worst’ to ‘best’ imaginable health state, respectively.<sup>8</sup> The EQ-5D-5L, with each item having 5 possible responses, has improved inter-observer [ICC 2,1 0.57] and test-retest [ICC 2,1 0.69] reliability compared to the previous EQ-5D-3L.<sup>9</sup> In addition, it has less ceiling effects [20.8% reduction] and adequate convergent validity when compared with the WHO-5 [spearman rank 0.38-0.51].<sup>10</sup>

### Barthel Index of Activities of Daily Living

The Barthel Index of Activities of Daily Living is routinely collected by clinical staff at the hospital, and will be used to evaluate self-care and mobility during activities of daily living.<sup>11</sup> It is a 10-item ordinal scale encompassing a range of mobility physical activity tasks. Each item is related to a specific task and rated with a given number of points. A score of ‘0’ is given for least independence/function on that item and scores above that [1 or 2] are given for increasing independence/function [range: 0-20]. The amount of time and physical assistance required to perform each task are used in determining the assigned value of each item. A higher score is associated with a greater likelihood of being able to live at home with a degree of independence following discharge from hospital. With most measurement testing performed in the stroke population, the Barthel Index has demonstrated excellent internal consistency [0.89-0.90]<sup>13</sup> and is highly responsive in detecting changes<sup>14</sup> with a minimal detectable change of 4.02 and minimally clinically important difference of 1.85.<sup>15</sup> High correlations have been demonstrated with the Functional Independence Measure [FIM], indicating convergent validity of the instrument.<sup>16</sup>

### Subjective Health Complaints Inventory

Premorbid subjective health complaints will be assessed for the 6 months preceding the traumatic injury, using the single-item questions for non-somatic domains from the Subjective Health Complaints Inventory.<sup>17</sup> The Subjective Health Complaints Inventory has been shown to be a reliable measure of recording subjective health complaints for a 30 day recall period,<sup>17</sup> although psychometric properties have not been reported for an extended 6 month recall period.

### Sleep quality

Current sleep quality [over the previous 24 hour period] will be assessed using an 11-point Numerical Rating Scale [NRS], ranging from 0 [‘best possible sleep’] to 10 [‘worst possible sleep’]. This scale has been shown to possess moderate psychometric properties in fibromyalgia patients using a symptom diary.<sup>18</sup> We will aim to assess current pain intensity at baseline, as frequently as every 48-hours while the patient is in hospital up to a maximum of 14 days following recruitment [depending upon patient accessibility and assessor availability], to gain accurate average and rate-of-change data. In addition, we will use the 0-10 NRS to assess average sleep quality, related to the preceding 6-months at the 6 and 12-month assessment points, although no psychometric properties have previously been reported for this recall period.

### *Psychosocial features*

The predictive strength of psychosocial factors demonstrated in both primary care,<sup>19 20</sup> and post-trauma pain literature<sup>21-24</sup> demonstrates the importance of including these domains as candidate predictors.

### The Hospital Anxiety and Depression Scales [HADS]

The HADS will be used to measure depression and anxiety, and their role in the manifestation of somatic symptoms.<sup>25</sup> There are 7 items which produce a cumulative score [range 0–21] for the anxiety [HADS-A] and depression [HADS-D] subscales, with a higher score indicative of greater anxiety and depression.<sup>26</sup> HADS has been tested in multiple populations demonstrating adequate to excellent internal consistency of HADS-A [0.68-0.93] and HADS-D [0.67-0.90].<sup>26</sup> Standard measurement of error in a coronary heart disease population was identified as 1.37 and 1.44 for anxiety and depression scales respectively, and minimal detectable change as 3.80 and 3.99 respectively.<sup>27</sup> The HADS has also demonstrated excellent concurrent validity when compared to various other depression/anxiety scales.<sup>26</sup>

### Coping Strategies Questionnaire 24 [CSQ-24]

The CSQ-24 will be used to provide an indication of coping strategies used by participants when they are in pain.<sup>28</sup> Developed from items from the earlier, much larger Coping Strategies Questionnaire,<sup>29</sup> the CSQ-24 is a 23-item scale, composed of 4 subscales: *catastrophizing* [6 items], *diversion* [6 items], *reinterpreting* [6 items], and *cognitive coping* [5 items]. Participants are asked to indicate if they have particular thoughts and feelings when they are experiencing pain. A score on each item is summed to yield an aggregate score for each subscale, with a higher score reflecting greater attribution of that particular coping strategy. The CSQ-24 has demonstrated good internal consistency in populations with low back pain patients [Chronbach's alpha for the 4 factors ranged from 0.75 to 0.85] and work-related pain [0.80 to 0.86].<sup>30</sup> Harland & Georgieff<sup>28</sup> suggested that, since individuals may have a positive score on more than one subscale, the highest scoring subscale should be deemed the dominant coping strategy.<sup>28</sup> However, a recent study in a low back pain cohort,<sup>31</sup>

1  
2  
3 in which individual items from multiple questionnaires were factorised, suggested that  
4 *diversion, reinterpreting* and *cognitive coping* clustered together as a single factor,  
5  
6 *diversion, reinterpreting* and *cognitive coping* clustered together as a single factor,  
7  
8 representing coping cognitions. By contrast, *catastrophizing* clustered with pain-related  
9  
10 distress items.

### 11 12 13 14 15 Tampa Scale of Kinesiophobia [TSK-11]

16  
17 The TSK-11 will be used to assess fear of movement or fear of injury or re-injury during  
18  
19 movement.<sup>32</sup> It is an 11-item questionnaire, eliminating psychometrically poor items from its  
20  
21 original 17-item version,<sup>33</sup> thus creating a shorter questionnaire with comparable internal  
22  
23 consistency and a 2-factor structure [activity avoidance and harm]. Each of the 11 items is  
24  
25 measured using a 4-point scale using the end points 1 [‘totally agree’] and 4 [‘totally  
26  
27 disagree’] [scoring range 11–44]. Higher scores indicate more fear-avoidance behaviour. The  
28  
29 TSK-11 has demonstrated acceptable to good internal consistency in acute and chronic  
30  
31 musculoskeletal pain populations.<sup>32 34</sup> Test-retest reliability has been reported as excellent  
32  
33 with a high standardised response mean; with good construct validity in relation to changes in  
34  
35 disability and pain.<sup>32</sup>

### 36 37 38 39 40 41 42 Pain Self-Efficacy Questionnaire [PSEQ]

43  
44 The patient’s confidence in their ability to perform activities despite their pain will be  
45  
46 evaluated using the PSEQ. Developed from the Self-Efficacy Scale,<sup>35</sup> the PSEQ consists of  
47  
48 10 physical and psychosocial activity items measuring from 0 [‘not at all confident’] to 6  
49  
50 [‘completely confident’] thus generating a total score from 0-60.<sup>36</sup> The PSEQ has  
51  
52 demonstrated excellent internal consistency [0.92], internal reliability [0.93], and test-re-test  
53  
54 correlations [r=0.73] and has demonstrated validity when compared to other self-efficacy  
55  
56  
57  
58  
59  
60

1  
2  
3 measurements.<sup>36</sup> It has been used in several large population studies, for example Campbell  
4  
5 et al.<sup>31</sup>  
6  
7  
8  
9

### 10 Impact of Event Scale Revised [IES-R]

11  
12 The IES-R will be used to measure the subjective stress experienced by the participant  
13  
14 following their traumatic event. The IES-R is a 22-item tool [range: 0-88] that consists of 8  
15  
16 intrusion and 8 avoidance items that are derived from the original IES,<sup>37</sup> with an additional 7-  
17  
18 items assessing hyperarousal.<sup>38</sup> Accordingly, items correspond directly to symptoms of post-  
19  
20 traumatic stress disorder.<sup>38</sup> Respondents are asked to identify a specific stressful life event  
21  
22 and then indicate how much they were distressed or bothered during the past seven days by  
23  
24 each 'difficulty' listed. Each item is rated on a 5-point scale ranging from 0 ['not at all'] to 4  
25  
26 ['extremely']. The IES-R yields a total score ranging 0 to 88 and subscale scores can also be  
27  
28 calculated for the Intrusion, Avoidance, and Hyperarousal sub-scales. The IES-R has  
29  
30 demonstrated good internal consistency for all subscales [intrusion 0.87-0.94, avoidance  
31  
32 0.84-0.97, hyperarousal 0.79-0.91].<sup>39</sup> High correlations have been found between the IES-R  
33  
34 and the original scale, supporting the concurrent validity of both measures.<sup>38</sup>  
35  
36  
37  
38  
39  
40  
41  
42

### 43 *Injury characteristics*

44  
45 Several measures relating to the characteristics of the sustained injury will be taken at  
46  
47 baseline, since it is plausible that some of these should possess predictive value.<sup>40</sup> The time of  
48  
49 the injury will be gained from hospital records. The location of the injury/injuries will be  
50  
51 recorded using an adapted version of previously developed pain drawing software, via a  
52  
53 tablet computer.<sup>41</sup> Information relating to the tissues damaged from the injury [e.g. fractures  
54  
55 sustained, whether the injury was penetrating, non-penetrating or both, review of available  
56  
57 imaging data] will be gathered from hospital records, where possible. Whether the participant  
58  
59  
60

1  
2  
3 received surgery following their admission [where, for what and when], and whether the  
4  
5 participant received assisted mechanical ventilation will also be recorded.  
6  
7  
8  
9

### 10 11 Injury Severity Scale [ISS]

12  
13  
14  
15 The ISS will be retrospectively calculated for each participant, including those who  
16  
17 withdraw. The ISS is a numerical score with a range 0-75, that is used to describe the overall  
18  
19 severity of injury, and can be used for both multiple and single injuries. The score is  
20  
21 calculated, based on the Abbreviated Injury Scale [AIS] scores.<sup>42 43</sup> Higher ISS scores have  
22  
23 been associated with increased rates of mortality<sup>42 44 45</sup> and length/cost of hospital stay.<sup>46</sup> It is  
24  
25 the recommended tool for summarising injury severity by the Trauma Audit and Research  
26  
27 Network [TARN]. Both TARN and the National Institute for Clinical Excellence<sup>47</sup>  
28  
29 recommend any participant with a score of >8 to be referred for rehabilitation.  
30  
31  
32  
33  
34  
35  
36  
37  
38  
39  
40

### 36 *Pain characteristics*

41 Pain characteristics [e.g. pain intensity, multi-site pain] have long been reported to hold  
42  
43 predictive value for long-term pain across a variety of conditions.<sup>19-21 48 49</sup> It is therefore  
44  
45 sensible that we include these domains as candidate predictors for post-trauma pain.  
46  
47  
48  
49

### 50 Pain intensity

51  
52 Pain intensity will be measured using an 11-point [0-10] Numerical Rating Scale [NRS],  
53  
54 measuring current pain from 'no pain' to 'pain as bad as could be', from the Chronic Pain  
55  
56 Grade Scale.<sup>50</sup> We will aim to assess *current* pain intensity at baseline, as frequently as every  
57  
58 48-hours while the participant is in hospital [depending upon participant accessibility and  
59  
60

1  
2  
3 assessor availability], to gain accurate mean and rate-of-change data. At the 6 and 12 month  
4  
5 assessment points, *current* pain intensity, as well as *average* and *worst* pain intensity related  
6  
7 to the preceding 6 months, will be collected as part of the Chronic Pain Grade Scale. NRS  
8  
9 scales are sensitive, reliable and valid instruments for pain intensity measurement,<sup>51-54</sup> and  
10  
11 have been recommended for use in clinical populations in preference to visual analogue  
12  
13 scales or verbal rating scales.<sup>55</sup> A 30% change on a pain NRS score is considered clinically  
14  
15 meaningful.<sup>56-60</sup>

### 21 Pain medication

22  
23 The patient's pain medication [type, dosage and time since trauma] intake will be noted and  
24  
25 the Medication Quantification Score [MQS], which is a reliable and validated score for  
26  
27 quantifying analgesics, will be calculated to obtain a comparable metric for all different  
28  
29 analgesics.<sup>61-63</sup> It enables characterisation of analgesics when many different medications are  
30  
31 involved and doses are irregular. It will be calculated for each non-opioid and opioid, based  
32  
33 on weights assigned by medication class and dosage level [level 1 = sub-therapeutic dosage  
34  
35 and/or on demand, level 2 = lower 50% of the therapeutic dose range, level 3 = upper 50% of  
36  
37 the therapeutic dose range, level 4 = supra-therapeutic dose] using the 1998 detriment  
38  
39 weights.<sup>64</sup> The detriment weights are summed by the dosage level to provide the final score.  
40  
41 These scores will be summed to provide a quantitative index for analgesic usage suitable for  
42  
43 statistical analysis.  
44  
45  
46  
47  
48  
49  
50

### 51 Pain drawing

52  
53 All participants will be requested to complete a pain drawing, indicating the spatial  
54  
55 distribution of their pain, over two body charts; one reporting a frontal view of the body and  
56  
57 one a dorsal view. We will also ask patients to mark their single 'most painful' site on one of  
58  
59  
60

1  
2  
3 these body charts. Pain drawing data will be collected using a custom software application on  
4 a tablet computer, and will be analysed with Matlab software, as described previously.<sup>41</sup> The  
5 software automatically calculates the number of shaded pixels from the pain drawing, which  
6 is defined as *pain extent*. Summaries of, and relationships between, pre-defined painful body  
7 regions will also be evaluated. Conventional pain drawing data will also be collected on  
8 paper follow-up questionnaires to assess painful body regions.  
9  
10  
11  
12  
13  
14  
15  
16  
17  
18

### 19 The painDETECT questionnaire

20  
21 It is assumed that all post-trauma patients will have significant nociception at baseline, but  
22 given the relatively high proportion of neuropathic pain following traumatic injury,<sup>65</sup> the  
23 contribution of other pain-related mechanistic pathways should also be assessed. The  
24 painDETECT questionnaire<sup>66</sup> will be used to facilitate the identification of neuropathic pain.  
25  
26 It consists of 9 items [7 evaluating pain quality, 1 evaluating pain pattern, and 1 evaluating  
27 pain radiation], all of which contribute to an aggregate score [range: -1-38]. This aggregate  
28 score can be divided into three classifications that represent the likelihood of neuropathic  
29 pain: ‘unlikely’ [0-12], ‘ambiguous’ [13–18] and ‘likely’ [19–38].<sup>66</sup> Although developed as a  
30 screening questionnaire for neuropathic pain, painDETECT may also function as a measure  
31 of characteristics that indicate augmented central pain processing.<sup>66</sup> The painDETECT  
32 questionnaire has demonstrated good internal consistency [0.76]<sup>67</sup> and excellent test-re-test  
33 reliability<sup>68</sup> within 1-hour of consultation [ICC{model not reported} 0.911] and 1-week post  
34 consultation [ICC{model not reported} 0.79].<sup>69</sup> Convergent validity has been demonstrated in  
35 comparison to pain severity,<sup>67 70</sup> health-related quality of life<sup>71</sup> and similar neuropathic pain  
36 screening tools.<sup>66</sup> As such, painDETECT outcomes will be measured at regular intervals  
37 while the participant is an inpatient in the hospital [subject to participant accessibility and  
38  
39  
40  
41  
42  
43  
44  
45  
46  
47  
48  
49  
50  
51  
52  
53  
54  
55  
56  
57  
58  
59  
60

1  
2  
3 assessor availability] to assess for emerging neuropathic pain and sensitization.

4  
5 Measurements will also be taken at all follow-up assessment points.  
6  
7  
8  
9

### 10 *Quantitative sensory testing [QST]*

11  
12  
13

14 QST methods will be used to assess pain sensibility, throughout which measurements will be  
15 concealed from participants. Owing to the clinical heterogeneity of the post-trauma  
16 population, precise standardisation of test sites between participants will not be possible.  
17 Instead, we have developed a standardised protocol that will be used to evaluate pain  
18 thresholds for multiple stimulus modalities [mechanical pressure, heat and cold] at the same  
19 sites in each participant. Each site where multi-modality pain threshold testing is performed  
20 will be within the receptive field of the same nerve root using described regions,<sup>72</sup> so that  
21 segmental cross-modality excitability may be compared. All pain thresholds will be measured  
22 at the same ‘local’ and ‘remote’ sites for each participant. We define local sites as being  
23 uninjured but within [or, if not accessible, as close as possible to] the same receptive field as  
24 the most painful injured tissue [e.g. skin over gastrocnemius in a participant with an ankle  
25 fracture]. By contrast, we define remote sites as a distant, accessible, site from the receptive  
26 fields in which tissues are injured [e.g. skin over tibialis anterior in a participant without  
27 lower limb injury], and on the contralateral side of the body where injured tissue is unilateral.  
28 Where possible, remote sites will be a mirror-image of the local site [to allow for comparison  
29 of absolute values], but in a trauma population we are aware that this may not always be  
30 possible. For all threshold testing modalities, an ascending method of limits design<sup>73</sup> will be  
31 used, whereby stimulus intensity will begin at a low level and gradually increase until the  
32 participant first perceives pain. Participants will be instructed to push a button or tell the  
33 assessor when the sensation has changed from one of the stimulus alone [e.g. just pressure] to  
34  
35  
36  
37  
38  
39  
40  
41  
42  
43  
44  
45  
46  
47  
48  
49  
50  
51  
52  
53  
54  
55  
56  
57  
58  
59  
60

1  
2  
3 a sensation of both the stimulus and pain [e.g. pressure and pain]. Following a brief  
4  
5 demonstration of equipment to familiarise participants, two consecutive assessments will be  
6  
7 performed for each modality at each site, and the means used for further analysis.<sup>74</sup> A  
8  
9 minimum of 30-seconds inter-stimulus interval will be given between each threshold  
10  
11 measurement within a single session. Measurements will be taken at baseline, while the  
12  
13 participant is an inpatient in the hospital; we will aim to collect data as frequently as every 48  
14  
15 hours to gain accurate rate-of-change data, but this will depend upon participant accessibility  
16  
17 and assessor availability. To ensure pain thresholds are consistently measured at the same  
18  
19 sites every session, sites will be labelled using a sterile, skin marking pen [Schuco Ltd, UK].  
20  
21 Because sites cannot be standardised between participants, the rates-of-change of these values  
22  
23 will be used as candidate predictive variables, to allow for comparisons between participants.  
24  
25 The order of pain threshold testing will be randomly assigned by modality at each session to  
26  
27 avoid order effects.  
28  
29  
30  
31  
32  
33  
34

35 Thermal [heat and cold] pain thresholds will be measured using skin-contact stimulation,  
36  
37 using the same thermode at the same sites, within specified local and remote dermatomes.  
38  
39 Thermal pain threshold assessments will be performed by delivering thermal stimuli directly  
40  
41 to the skin through a metal 30x30 mm Peltier thermode, using a TSA-II NeuroSensory  
42  
43 Analyzer thermal stimulator and accompanying software [Medoc Ltd, Israel]. To evaluate  
44  
45 heat pain threshold, temperature will be gradually increased, at a rate of 1°C/s from a  
46  
47 ‘neutral’ baseline of 32°C, to a maximum temperature of 50.5°C to avoid thermal injury.<sup>75</sup>  
48  
49 During each measurement, participants will be instructed to press a button when the stimulus  
50  
51 becomes painful, and this will be documented as the threshold value. Once pain threshold is  
52  
53 achieved [and recorded], the temperature will return to the baseline value at the same rate  
54  
55 [1°C/s]. For cold pain threshold measurements, the temperature will be gradually reduced, at  
56  
57  
58  
59  
60

1  
2  
3 a rate of 1°C/s from the baseline of 32°C, to a minimum temperature of 0°C,<sup>75</sup> before also  
4  
5 returning to baseline at a rate of 1°C/s.  
6  
7  
8  
9

10 Pressure pain thresholds will be measured using a digital pressure algometer [Series 7 force  
11  
12 gauge, Mark-10 Corporation, USA], providing real-time force measurement and an analogue  
13  
14 output that can be linked to a computer. Skin and muscle tissue are simultaneously stimulated  
15  
16 during pressure threshold testing; sites will therefore be chosen where a dermatome and  
17  
18 myotome are likely to share a common nerve root innervation [e.g. skin over tibialis  
19  
20 anterior]. The algometer has a hard rubber circular contact tip of 1.2cm<sup>2</sup> area, with no sharp  
21  
22 edges so to avoid an uneven pressure stimulus.<sup>76</sup> In order to preserve hygiene and attend to  
23  
24 infection control measures in trauma patients, the contact tip will be covered with a clean,  
25  
26 thin disposable covering. The tip will be applied perpendicular to the skin at a constant rate of  
27  
28 pressure increase of 50kPa/s [6.0N/s using the 1.2cm<sup>2</sup> tip], until the first onset of pain. For  
29  
30 each measurement, pressure will be unloaded immediately once the participant indicates that  
31  
32 their pain threshold has been reached.<sup>74</sup>  
33  
34  
35  
36  
37  
38  
39

40 To measure excitability of nociceptive pathways in response to mechanical stimuli, a series of  
41  
42 repetitive, pressure stimulus 'pulses' will be applied via the digital algometer, with the aim of  
43  
44 provoking temporal summation responses.<sup>77-79</sup> A minimum of 2 minutes after all threshold  
45  
46 tests have been completed, a series of 10 consecutive pressure pulses will be applied at the  
47  
48 remote and local sites [the order of site being randomly assigned]. The peak pressure reached  
49  
50 during each pulse will be the mean pressure pain threshold that was measured for that  
51  
52 particular site, as described previously. For each pulse, pressure will be gradually increased to  
53  
54 the peak value over a period of 5 seconds, maintained at that peak value for 1 second, and  
55  
56 then immediately released. A 5 second inter-stimulus interval will be used between pulses,  
57  
58  
59  
60

1  
2  
3 during which the tip of the algometer will remain in contact with the skin.<sup>78 79</sup> Pain intensity  
4 from the pulses will be rated on a numerical rating scale [0 being 'no pain' to 10 being 'pain  
5 as bad as could be']. In the event that participants indicate that pain has become intolerable,  
6 the sequence will be stopped immediately, and the NRS score and number of impulses  
7 performed at that point will be noted.  
8  
9  
10  
11  
12  
13  
14  
15  
16

### 17 *Biomarkers*

18  
19  
20  
21 Serum levels of C-reactive protein [CRP] will be used as a biomarker for inflammation; one  
22 of the primary mechanistic pathways that can evoke pain.<sup>80</sup> CRP is an acute-phase response  
23 protein produced by hepatocytes and is usually found in concentrations of 0.3 to 1.7 mg/l<sup>81</sup>.  
24 Increased production is due to cytokine-dependent induction of synthesis and elevated levels  
25 may be detected within eight hours of a stimulus and can reach 500 mg/l.<sup>28</sup> Besides  
26 trauma,<sup>82</sup> elevated levels of CRP may be seen in conditions such as autoimmune disease,  
27 infection and malignancy. It has also been associated with acute sciatica.<sup>83</sup> The level of CRP  
28 usually peaks within 48 hours of the stimulus. In contrast, when the stimulus for increased  
29 production completely ceases, the circulating CRP concentration falls rapidly, at almost the  
30 rate of plasma CRP clearance.<sup>84</sup> A fall in serial measurements usually indicates resolution of  
31 the underlying process, while persisting elevated levels indicates ongoing inflammation.<sup>85</sup>  
32  
33 Where possible, measurements of serum CRP will be repeatedly taken on a 48 hour schedule  
34 while the participant is an inpatient; absolute and rates of change of CRP values will be used  
35 as candidate predictive factors.<sup>86</sup>  
36  
37  
38  
39  
40  
41  
42  
43  
44  
45  
46  
47  
48  
49  
50  
51  
52  
53  
54  
55

56 Plasma cell-free DNA [cfDNA] will be used as an indicator of tissue damage. This includes  
57 both nuclear DNA [nDNA] and mitochondrial DNA [mtDNA], which circulate after being  
58  
59  
60

1  
2  
3 released from cells when they are damaged and are thought to be amongst the important  
4  
5 initiators of systemic inflammatory responses following tissue injury known as Damage  
6  
7 Associated Molecular Patterns [DAMPs].<sup>87</sup> Clinical outcomes in trauma patients have been  
8  
9 related to plasma mtDNA concentration.<sup>88 89</sup> Other work with severe trauma patients has  
10  
11 shown that cfDNA values rise to their peak value in the second week post-trauma, and then  
12  
13 gradually return to baseline values after approximately 2 months.<sup>90</sup> Where possible,  
14  
15 measurements of circulating cfDNA will be repeatedly taken on a 48 hour schedule while the  
16  
17 participant is an inpatient; absolute values and rates of change of cfDNA values will be used  
18  
19 as candidate predictive factors.  
20  
21  
22  
23  
24  
25  
26  
27  
28  
29  
30  
31  
32  
33  
34  
35  
36  
37  
38  
39  
40  
41  
42  
43  
44  
45  
46  
47  
48  
49  
50  
51  
52  
53  
54  
55  
56  
57  
58  
59  
60

## References

1. Stewart AL, Greenfield S, Hays RD, et al. Functional status and well-being of patients with chronic conditions. Results from the Medical Outcomes Study. *JAMA* 1989;262(7):907-13.
2. Ware JE, Jr., Sherbourne CD. The MOS 36-item short-form health survey (SF-36). I. Conceptual framework and item selection. *Med Care* 1992;30(6):473-83.
3. Hays RD, Sherbourne CD, Mazel RM. The RAND 36-Item Health Survey 1.0. *Health Econ* 1993;2(3):217-27.
4. McHorney CA, Ware JE, Jr., Raczek AE. The MOS 36-Item Short-Form Health Survey (SF-36): II. Psychometric and clinical tests of validity in measuring physical and mental health constructs. *Med Care* 1993;31(3):247-63.
5. Revell MP, Pynsent, P.B., Abudu, A., Fairbank, J.C.T. . Trauma Scores and Trauma Outcome Measures *Trauma* 2003;5:61-70.
6. Ware J. SF-36 Health Survey Updated. *Spine* 2000;25(24):3130-39.
7. Dattani R, Slobogean, G.P., O'Brien, P.J., Broekhuysse, H.M., Blachut, P.A., Guy, P., Lefavre, K.A. Psychometric Analysis of Measuring Functional Outcomes in Tibial Plateau Fractures using the Short Form (SF-36), Short Musculoskeletal Function Assessment (SMFA) and the Western Ontario McMaster Osteoarthritis (WOMAC) Questionnaires. *Injury Int J Care Injured* 2013;44:825-29.
8. Brooks R. EuroQol: the current state of play. *Health Policy* 1996;37(1):53-72.
9. Janssen MF, Birnie E, Haagsma JA, et al. Comparing the standard EQ-5D three-level system with a five-level version. *Value Health* 2008;11(2):275-84. doi: 10.1111/j.1524-4733.2007.00230.x
10. Janssen MF, Pickard AS, Golicki D, et al. Measurement properties of the EQ-5D-5L compared to the EQ-5D-3L across eight patient groups: a multi-country study. *Qual Life Res* 2013;22(7):1717-27. doi: 10.1007/s11136-012-0322-4
11. Mahoney FI, Barthel DW. Functional Evaluation: The Barthel Index. *Md State Med J* 1965;14:61-5.
12. Shah S, Vanclay F, Cooper B. Improving the sensitivity of the Barthel Index for stroke rehabilitation. *J Clin Epidemiol* 1989;42(8):703-9.
13. Hseuh IP, Lee, M.M., Hsieh, C.L. . Psychometric Characteristics of the Barthel Activities of Daily Living Index in Stroke Patients *J Formos Med Assoc* 2001;100(526-532)
14. Hseuh IP, Lin, J.H., Jeng, J.S., Hsieh, C.L. Comparison of the Psychometric Characteristics of the Functional Independence Measure, 5 Item Barthel Index and 10 Item Barthel Index in Patients with Stroke. *J Neurol Neurosurg Psychiatry* 2002;73:188-90.
15. Hsieh YW, Wang, C.H., Wu, S.C., Chen, P.C., Sheu, C.F., Hsieh, C.L. . Establishing the Minimally Clinically Important Difference of the Barthel Index in Stroke Patients. *Neurorehabilitation and Neural Repair* 2007;21(3):233-38.
16. Hobart JC, Thompson AJ. The five item Barthel index. *J Neurol Neurosurg Psychiatry* 2001;71(2):225-30.
17. Eriksen HR, Ihlebaek C, Ursin H. A scoring system for subjective health complaints (SHC). *Scand J Public Health* 1999;27(1):63-72.
18. Cappelleri JC BA, McDermott AM, Sadosky AB, Petrie CD, Martin S. Psychometric properties of a single-item scale to assess sleep quality among individuals with fibromyalgia. *Health Qual Life Outcomes* 2009;17(7):54.
19. Mallen CD, Peat G, Thomas E, et al. Prognostic factors for musculoskeletal pain in primary care: a systematic review. *Br J Gen Pract* 2007;57(541):655-61.
20. Artus M, Campbell P, Mallen CD, et al. Generic prognostic factors for musculoskeletal pain in primary care: a systematic review. *BMJ Open* 2017;7(1):e012901. doi: 10.1136/bmjopen-2016-012901

- 1
  - 2
  - 3
  - 4
  - 5
  - 6
  - 7
  - 8
  - 9
  - 10
  - 11
  - 12
  - 13
  - 14
  - 15
  - 16
  - 17
  - 18
  - 19
  - 20
  - 21
  - 22
  - 23
  - 24
  - 25
  - 26
  - 27
  - 28
  - 29
  - 30
  - 31
  - 32
  - 33
  - 34
  - 35
  - 36
  - 37
  - 38
  - 39
  - 40
  - 41
  - 42
  - 43
  - 44
  - 45
  - 46
  - 47
  - 48
  - 49
  - 50
  - 51
  - 52
  - 53
  - 54
  - 55
  - 56
  - 57
  - 58
  - 59
  - 60
21. Clay FJ, Newstead SV, Watson WL, et al. Bio-psychosocial determinants of persistent pain 6 months after non-life-threatening acute orthopaedic trauma. *J Pain* 2010;11(5):420-30. doi: 10.1016/j.jpain.2009.12.002
22. Archer KR, Castillo RC, Wegener ST, et al. Pain and satisfaction in hospitalized trauma patients: the importance of self-efficacy and psychological distress. *J Trauma Acute Care Surg* 2012;72(4):1068-77. doi: 10.1097/TA.0b013e3182452df5
23. Rosenbloom BN, Khan S, McCartney C, et al. Systematic review of persistent pain and psychological outcomes following traumatic musculoskeletal injury. *J Pain Res* 2013;6:39-51. doi: 10.2147/JPR.S38878
24. Vranceanu AM, Bachoura A, Weening A, et al. Psychological factors predict disability and pain intensity after skeletal trauma. *J Bone Joint Surg Am* 2014;96(3):e20. doi: 10.2106/JBJS.L.00479
25. Zigmond AS, Snaith RP. The hospital anxiety and depression scale. *Acta Psychiatr Scand* 1983;67(6):361-70.
26. Bjelland I, Dahl AA, Haug TT, et al. The validity of the Hospital Anxiety and Depression Scale. An updated literature review. *J Psychosom Res* 2002;52(2):69-77.
27. Wang W, Chair, S.Y., Thompson, D.R., Twinn, S.F. A Psychometric Evaluation of the Chinese Version of the Hospital Anxiety and Depression Scale in Patients with Coronary Heart Disease *Journal of Clinical Nursing* 2009;18:1908-15.
28. Harland NJ Georgieff K. Development of the coping strategies questionnaire 24, a clinically utilitarian version of the coping strategies questionnaire. *Rehabilitation Psychology* 2003;48(4):296-300.
29. Rosenstiel AK KF. The use of coping strategies in chronic low back pain patients: Relationship to patient characteristics and current adjustment. . *Pain* 1983;17: 33-44.
30. Chiu C JJ, Fujikawa M, Strand D, Cheing G, Lee G, Chan F Measurement Structure of the Coping Strategies Questionnaire-24 in a Sample of Individuals with Musculoskeletal Pain: A Confirmatory Factor Analysis. . *Rehabilitation Research, Policy, and Education* 2014;28(2):80-90.
31. Campbell P, Foster NF, Thomas E, Dunn KM. Prognostic Indicators of Low Back Pain in Primary Care: Five-Year Prospective Study. *J Pain* 2013;14(8):873-83.
32. Woby SR, Roach NK, Urmston M, et al. Psychometric properties of the TSK-11: a shortened version of the Tampa Scale for Kinesiophobia. *Pain* 2005;117(1-2):137-44. doi: 10.1016/j.pain.2005.05.029
33. Miller RP KS, Todd D. The Tampa Scale: a measure of kinesiophobia. *Clin J Pain* 1991;7(1):51-52.
34. Swinkels-Meewisse EJCM, Swinkels RAHM, Verbeek ALM, Vlaeyen JWS. Psychometric Properties of the Tampa Scale for Kinesiophobia and the Fear Avoidance Beliefs Questionnaire in Acute Low Back Pain *Manual Therapy* 2003;8(1):29-36.
35. Kall LB. Psychological determinants of quality of life in patients with whiplash associated disorders-a prospective study. *Disabil Rehabil* 2009;31(3):227-36. doi: 10.1080/09638280801912030
36. Nicholas MK. The pain self-efficacy questionnaire: Taking pain into account. *Eur J Pain* 2007;11(2):153-63.
37. Horowitz M, Wilner N, Alvarez W. Impact of Event Scale: a measure of subjective stress. *Psychosom Med* 1979;41(3):209-18.
38. Beck JG, Grant DM, Read JP, et al. The impact of event scale-revised: psychometric properties in a sample of motor vehicle accident survivors. *J Anxiety Disord* 2008;22(2):187-98. doi: 10.1016/j.janxdis.2007.02.007
39. Creamer M, Bell R, Failla S. Psychometric properties of the Impact of Event Scale - Revised. *Behav Res Ther* 2003;41(12):1489-96.

- 1
- 2
- 3
- 4 40. Walker-Bone K HN, Ntani G, Tinati T, Jones GT, Smith BH, Macfarlane GJ, Cooper C. . Chronic
- 5 widespread bodily pain is increased among individuals with history of fracture: findings from
- 6 UK Biobank. . *Arch Osteoporos* 2016;11:1.
- 7 41. Barbero M, Mores, Leoni D, Gatti R, Egloff M, Falla D. Test-retest reliability of pain extent and
- 8 pain location using a novel method for pain drawing analysis. *European Journal of Pain*
- 9 2015;19:1129-38.
- 10 42. Baker SP, O'Neill B. The injury severity score: an update. *J Trauma* 1976;16(11):882-5.
- 11 43. Akmal M, Trivedi R, Sutcliffe J. Functional outcome in trauma patients with spinal injury. *Spine*
- 12 (*Phila Pa 1976*) 2003;28(2):180-5. doi: 10.1097/01.BRS.0000041577.12233.96
- 13 44. Baker SP, O'Neill B, Haddon W, Jr., et al. The injury severity score: a method for describing
- 14 patients with multiple injuries and evaluating emergency care. *J Trauma* 1974;14(3):187-96.
- 15 45. Linn S. The injury severity score--importance and uses. *Ann Epidemiol* 1995;5(6):440-6.
- 16 46. Sears JM, Blonar L, Bowman SM. Predicting work-related disability and medical cost outcomes: a
- 17 comparison of injury severity scoring methods. *Injury* 2014;45(1):16-22. doi:
- 18 10.1016/j.injury.2012.12.024
- 19 47. NICE. Low back pain and sciatica in over 16s: assessment and management, NICE guideline
- 20 [NG59]: National Institute for Health and Care Excellence, 2016.
- 21 48. Kamaleri Y, Natvig B, Ihlebaek CM, et al. Change in the number of musculoskeletal pain sites: A
- 22 14-year prospective study. *Pain* 2009;141(1-2):25-30. doi: 10.1016/j.pain.2008.09.013
- 23 49. Clay FJ, Watson WL, Newstead SV, et al. A systematic review of early prognostic factors for
- 24 persisting pain following acute orthopedic trauma. *Pain Res Manag* 2012;17(1):35-44.
- 25 50. Von Korff M, Ormel J, Keefe FJ, et al. Grading the severity of chronic pain. *Pain* 1992;50(2):133-
- 26 49.
- 27 51. Jensen MP, McFarland CA. Increasing the reliability and validity of pain intensity measurement in
- 28 chronic pain patients. *Pain* 1993;55(2):195-203.
- 29 52. Jensen MP, Turner, J.A. and Romano, J.M. . What is the maximum number of levels needed in
- 30 pain intensity measurement? . *Pain* 1994;58:387-92.
- 31 53. Jensen MP, Turner, L.R., Turner, J.A. and Romano, J.M. The use of multiple-item scales for pain
- 32 intensity measurement in chronic pain patients. *Pain* 1996;67:35-40.
- 33 54. Jensen MP, Turner JA, Romano JM, et al. Comparative reliability and validity of chronic pain
- 34 intensity measures. *Pain* 1999;83(2):157-62.
- 35 55. Von Korff M. Epidemiological and survey methods – assessment of chronic pain. In Turk, D.C. and
- 36 Melzack, R., editors, *Handbook of Pain Assessment*. . New York, USA: Guildford Press
- 37 2001:603-18.
- 38 56. Farrar JT, Young JP, Jr., LaMoreaux L, et al. Clinical importance of changes in chronic pain
- 39 intensity measured on an 11-point numerical pain rating scale. *Pain* 2001;94(2):149-58.
- 40 57. Salaffi F, Stancati A, Silvestri CA, et al. Minimal clinically important changes in chronic
- 41 musculoskeletal pain intensity measured on a numerical rating scale. *Eur J Pain*
- 42 2004;8(4):283-91. doi: 10.1016/j.ejpain.2003.09.004
- 43 58. Childs JD, Piva SR, Fritz JM. Responsiveness of the numeric pain rating scale in patients with low
- 44 back pain. *Spine (Phila Pa 1976)* 2005;30(11):1331-4.
- 45 59. Ostelo RW, Deyo RA, Stratford P, Waddell G, Croft P, Von Korff M, Bouter LM, Henrica C.
- 46 Interpreting change scores for pain and functional status in low back pain: towards
- 47 international consensus regarding minimal important change. *Spine* 2008;33(1):90-94.
- 48 60. Michener LA, Snyder AR, Leggin BG. Responsiveness of the numeric pain rating scale in patients
- 49 with shoulder pain and the effect of surgical status. *J Sport Rehabil* 2011;20(1):115-28.
- 50 61. Masters Steedman S, Middaugh SJ, Kee WG, et al. Chronic-pain medications: equivalence levels
- 51 and method of quantifying usage. *Clin J Pain* 1992;8(3):204-14.
- 52 62. Harden RN, Weiland SR, Remble TA, et al. Medication Quantification Scale Version III: update in
- 53 medication classes and revised detriment weights by survey of American Pain Society
- 54 Physicians. *J Pain* 2005;6(6):364-71. doi: 10.1016/j.jpain.2005.01.350
- 55
- 56
- 57
- 58
- 59
- 60

63. Gallizzi M GC, Harden RN, Stanos S, Khan A. Medication Quantification Scale Version III: internal validation of detriment weights using a chronic pain population. . *Pain Pract* 2008;8(1):1-4.
64. Stormo KJ, Kee WG, Steedham S, et al. Medication quantification scores and evaluation of patient pharmacology profiles. *Current Review of Pain* 1998;2(3):171–74.
65. Rosenbloom BN, Katz J, Chin KY, et al. Predicting pain outcomes after traumatic musculoskeletal injury. *Pain* 2016;157(8):1733-43. doi: 10.1097/j.pain.0000000000000580
66. Freynhagen R, Baron R, Gockel U, et al. painDETECT: a new screening questionnaire to identify neuropathic components in patients with back pain. *Curr Med Res Opin* 2006;22(10):1911-20. doi: 10.1185/030079906X132488
67. Cappelleri JC, Koduru V, Bienen EJ, et al. A cross-sectional study examining the psychometric properties of the painDETECT measure in neuropathic pain. *J Pain Res* 2015;8(8):159-67. doi: 10.2147/JPR.S80046
68. Keller T, Freynhagen R, Tolle TR, et al. A retrospective analysis of the long-term test-retest stability of pain descriptors of the painDETECT questionnaire. *Curr Med Res Opin* 2016;32(2):343-9. doi: 10.1185/03007995.2015.1125869
69. Tampin B, Bohne T, Callan M, et al. Reliability of the English version of the painDETECT questionnaire. *Curr Med Res Opin* 2017;33(4):741-48. doi: 10.1080/03007995.2017.1278682
70. Sadosky A, Koduru V, Bienen EJ, et al. Characterizing individual painDETECT symptoms by average pain severity. *Clinicoecon Outcomes Res* 2016;8:361-6. doi: 10.2147/CEOR.S105402
71. Cappelleri JC, Koduru V, Bienen EJ, et al. Mapping painDETECT, a neuropathic pain screening tool, to the EuroQol (EQ-5D-3L). *Qual Life Res* 2017;26(2):467-77. doi: 10.1007/s11136-016-1379-2
72. O'Brien M. Aids to the Examination of the Peripheral Nervous System, 5<sup>th</sup> Edition: Saunders (Elsevier) 2010.
73. Palmer ST, Martin DJ, Steedman WM, Ravey J, S. C-and A $\delta$ -fibre mediated thermal perception: response to rate of temperature change using method of limits. . *Somatosensory & motor research* 2000;17(4):325-33.
74. Chesterton LS SJ, Wright CC, Foster NE. Interrater reliability of algometry in measuring pressure pain thresholds in healthy humans, using multiple raters. *Clin J Pain* 2007;23(9):760-6.
75. Knutti IA SM, Opsommer E. Test-retest reliability of thermal quantitative sensory testing on two sites within the L5 dermatome of the lumbar spine and lower extremity. *Neurosci Lett* 2014;5(579):157-62.
76. Greenspan JD, McGillis SL. Stimulus features relevant to the perception of sharpness and mechanically evoked cutaneous pain. *Somatosens Mot Res* 1991;8(2):137-47.
77. Sarlani E, Greenspan JD. Gender differences in temporal summation of mechanically evoked pain. *Pain* 2002;97(1-2):163-9.
78. Nie H, Arendt-Nielsen L, Andersen H, et al. Temporal summation of pain evoked by mechanical stimulation in deep and superficial tissue. *J Pain* 2005;6(6):348-55. doi: 10.1016/j.jpain.2005.01.352
79. Nie H, Arendt-Nielsen L, Madeleine P, et al. Enhanced temporal summation of pressure pain in the trapezius muscle after delayed onset muscle soreness. *Exp Brain Res* 2006;170(2):182-90. doi: 10.1007/s00221-005-0196-6
80. Woolf CJ, Bennett GJ, Doherty M, et al. Towards a mechanism-based classification of pain? *Pain* 1998;77(3):227-9.
81. Whicher JT ES. Acute phase proteins. *Hosp Update* 1990:899-905.
82. Gosling P, Dickson GR. Serum c-reactive protein in patients with serious trauma. *Injury* 1992;23(7):483-6.
83. Sturmer T, Raum E, Buchner M, et al. Pain and high sensitivity C reactive protein in patients with chronic low back pain and acute sciatic pain. *Ann Rheum Dis* 2005;64(6):921-5. doi: 10.1136/ard.2004.027045

- 1  
2  
3 84. Pepys MB, Hirschfield GM. C-reactive protein: a critical update. *J Clin Invest* 2003;111(12):1805-  
4 12. doi: 10.1172/JCI18921  
5  
6 85. Giannoudis PV HF, Pape HC. . Inflammatory serum markers in patients with multiple trauma. Can  
7 they predict outcome? *J Bone Joint Surg Br* 2004;86(3):313-23.  
8  
9 86. Barma M, Goodbrand, J.A., Donnan, P.T., McGilchrist, M.M., Frost, H., McMurdo, M.E. and  
10 Witham, M.D. Slower Decline in C-Reactive Protein after an Inflammatory Insult Is  
11 Associated with Longer Survival in Older Hospitalised Patients. . *PloS one*  
12 2016;11(7):e0159412.  
13  
14 87. Krysko DV, Agostinis P, Krysko O, et al. Emerging role of damage-associated molecular patterns  
15 derived from mitochondria in inflammation. *Trends Immunol* 2011;32(4):157-64. doi:  
16 10.1016/j.it.2011.01.005  
17  
18 88. Simmons JD, Lee YL, Mulekar S, et al. Elevated levels of plasma mitochondrial DNA DAMPs are  
19 linked to clinical outcome in severely injured human subjects. *Ann Surg* 2013;258(4):591-6;  
20 discussion 96-8. doi: 10.1097/SLA.0b013e3182a4ea46  
21  
22 89. Yamanouchi S, Kudo D, Yamada M, et al. Plasma mitochondrial DNA levels in patients with  
23 trauma and severe sepsis: time course and the association with clinical status. *J Crit Care*  
24 2013;28(6):1027-31. doi: 10.1016/j.jcrc.2013.05.006  
25  
26 90. Foster MA. Steroids and immunity from injury through to rehabilitation (SIR Study). University of  
27 Birmingham, 2013.



SPIRIT 2013 Checklist: Recommended items to address in a clinical trial protocol and related documents\*

| Section/item                      | Item No | Description                                                                                                                                                                                                                                                                                        |
|-----------------------------------|---------|----------------------------------------------------------------------------------------------------------------------------------------------------------------------------------------------------------------------------------------------------------------------------------------------------|
| <b>Administrative information</b> |         |                                                                                                                                                                                                                                                                                                    |
| Title                             | 1       | Descriptive title identifying the study design, population, interventions, and, if applicable, trial acronym – Page 1                                                                                                                                                                              |
| Trial registration                | 2a      | Trial identifier and registry name. If not yet registered, name of intended registry – N/A                                                                                                                                                                                                         |
|                                   | 2b      | All items from the World Health Organization Trial Registration Data Set – N/A                                                                                                                                                                                                                     |
| Protocol version                  | 3       | Date and version identifier – Page 1                                                                                                                                                                                                                                                               |
| Funding                           | 4       | Sources and types of financial, material, and other support – Page 25                                                                                                                                                                                                                              |
| Roles and responsibilities        | 5a      | Names, affiliations, and roles of protocol contributors – Pages 1, 25                                                                                                                                                                                                                              |
|                                   | 5b      | Name and contact information for the trial sponsor – Page 25                                                                                                                                                                                                                                       |
|                                   | 5c      | Role of study sponsor and funders, if any, in study design; collection, management, analysis, and interpretation of data; writing of the report; and the decision to submit the report for publication, including whether they will have ultimate authority over any of these activities – Page 25 |
|                                   | 5d      | Composition, roles, and responsibilities of the coordinating centre, steering committee, endpoint adjudication committee, data management team, and other individuals or groups overseeing the trial, if applicable (see Item 21a for data monitoring committee) – Page 25                         |
| <b>Introduction</b>               |         |                                                                                                                                                                                                                                                                                                    |
| Background and rationale          | 6a      | Description of research question and justification for undertaking the trial, including summary of relevant studies (published and unpublished) examining benefits and harms for each intervention – Page 5 (introduction, page 6 (aims and objectives)                                            |
|                                   | 6b      | Explanation for choice of comparators – Supplementary file                                                                                                                                                                                                                                         |
| Objectives                        | 7       | Specific objectives or hypotheses (Page 6)                                                                                                                                                                                                                                                         |

1  
2  
3  
4  
5  
6  
7  
8  
9  
10  
11  
12  
13  
14  
15  
16  
17  
18  
19  
20  
21  
22  
23  
24  
25  
26  
27  
28  
29  
30  
31  
32  
33  
34  
35  
36  
37  
38  
39  
40  
41  
42  
43  
44  
45  
46  
47  
48  
49  
50  
51

|              |   |                                                                                                                                                                                                                    |
|--------------|---|--------------------------------------------------------------------------------------------------------------------------------------------------------------------------------------------------------------------|
| Trial design | 8 | Description of trial design including type of trial (eg, parallel group, crossover, factorial, single group), allocation ratio, and framework (eg, superiority, equivalence, noninferiority, exploratory) – Page 7 |
|--------------|---|--------------------------------------------------------------------------------------------------------------------------------------------------------------------------------------------------------------------|

### **Methods: Participants, interventions, and outcomes**

|               |   |                                                                                                                                                                                             |
|---------------|---|---------------------------------------------------------------------------------------------------------------------------------------------------------------------------------------------|
| Study setting | 9 | Description of study settings (eg, community clinic, academic hospital) and list of countries where data will be collected. Reference to where list of study sites can be obtained – Page 7 |
|---------------|---|---------------------------------------------------------------------------------------------------------------------------------------------------------------------------------------------|

|                      |    |                                                                                                                                                                                                           |
|----------------------|----|-----------------------------------------------------------------------------------------------------------------------------------------------------------------------------------------------------------|
| Eligibility criteria | 10 | Inclusion and exclusion criteria for participants. If applicable, eligibility criteria for study centres and individuals who will perform the interventions (eg, surgeons, psychotherapists) – Pages 8-10 |
|----------------------|----|-----------------------------------------------------------------------------------------------------------------------------------------------------------------------------------------------------------|

|               |     |                                                                                                                                  |
|---------------|-----|----------------------------------------------------------------------------------------------------------------------------------|
| Interventions | 11a | Interventions for each group with sufficient detail to allow replication, including how and when they will be administered – N/A |
|---------------|-----|----------------------------------------------------------------------------------------------------------------------------------|

|  |     |                                                                                                                                                                                                      |
|--|-----|------------------------------------------------------------------------------------------------------------------------------------------------------------------------------------------------------|
|  | 11b | Criteria for discontinuing or modifying allocated interventions for a given trial participant (eg, drug dose change in response to harms, participant request, or improving/worsening disease) – N/A |
|--|-----|------------------------------------------------------------------------------------------------------------------------------------------------------------------------------------------------------|

|  |     |                                                                                                                                                         |
|--|-----|---------------------------------------------------------------------------------------------------------------------------------------------------------|
|  | 11c | Strategies to improve adherence to intervention protocols, and any procedures for monitoring adherence (eg, drug tablet return, laboratory tests) – N/A |
|--|-----|---------------------------------------------------------------------------------------------------------------------------------------------------------|

|  |     |                                                                                                     |
|--|-----|-----------------------------------------------------------------------------------------------------|
|  | 11d | Relevant concomitant care and interventions that are permitted or prohibited during the trial – N/A |
|--|-----|-----------------------------------------------------------------------------------------------------|

|          |    |                                                                                                                                                                                                                                                                                                                                                                                                                                                       |
|----------|----|-------------------------------------------------------------------------------------------------------------------------------------------------------------------------------------------------------------------------------------------------------------------------------------------------------------------------------------------------------------------------------------------------------------------------------------------------------|
| Outcomes | 12 | Primary, secondary, and other outcomes, including the specific measurement variable (eg, systolic blood pressure), analysis metric (eg, change from baseline, final value, time to event), method of aggregation (eg, median, proportion), and time point for each outcome. Explanation of the clinical relevance of chosen efficacy and harm outcomes is strongly recommended – Page 10 (primary outcome), Supplementary file (candidate predictors) |
|----------|----|-------------------------------------------------------------------------------------------------------------------------------------------------------------------------------------------------------------------------------------------------------------------------------------------------------------------------------------------------------------------------------------------------------------------------------------------------------|

|                      |    |                                                                                                                                                                                               |
|----------------------|----|-----------------------------------------------------------------------------------------------------------------------------------------------------------------------------------------------|
| Participant timeline | 13 | Time schedule of enrolment, interventions (including any run-ins and washouts), assessments, and visits for participants. A schematic diagram is highly recommended (see Figure) – Pages 8-10 |
|----------------------|----|-----------------------------------------------------------------------------------------------------------------------------------------------------------------------------------------------|

|             |    |                                                                                                                                                                                                     |
|-------------|----|-----------------------------------------------------------------------------------------------------------------------------------------------------------------------------------------------------|
| Sample size | 14 | Estimated number of participants needed to achieve study objectives and how it was determined, including clinical and statistical assumptions supporting any sample size calculations – Pages 14-15 |
|-------------|----|-----------------------------------------------------------------------------------------------------------------------------------------------------------------------------------------------------|

|             |    |                                                                                                   |
|-------------|----|---------------------------------------------------------------------------------------------------|
| Recruitment | 15 | Strategies for achieving adequate participant enrolment to reach target sample size – Pages 14-15 |
|-------------|----|---------------------------------------------------------------------------------------------------|

### **Methods: Assignment of interventions (for controlled trials)**

52  
53  
54  
55  
56  
57  
58  
59  
60

Allocation:

|    |                |     |                                                                         |
|----|----------------|-----|-------------------------------------------------------------------------|
| 1  |                |     |                                                                         |
| 2  | Sequence       | 16a | Method of generating the allocation sequence (eg, computer-             |
| 3  | generation     |     | generated random numbers), and list of any factors for stratification.  |
| 4  |                |     | To reduce predictability of a random sequence, details of any planned   |
| 5  |                |     | restriction (eg, blocking) should be provided in a separate document    |
| 6  |                |     | that is unavailable to those who enrol participants or assign           |
| 7  |                |     | interventions – N/A                                                     |
| 8  |                |     |                                                                         |
| 9  | Allocation     | 16b | Mechanism of implementing the allocation sequence (eg, central          |
| 10 | concealment    |     | telephone; sequentially numbered, opaque, sealed envelopes),            |
| 11 | mechanism      |     | describing any steps to conceal the sequence until interventions are    |
| 12 |                |     | assigned – N/A                                                          |
| 13 |                |     |                                                                         |
| 14 | Implementation | 16c | Who will generate the allocation sequence, who will enrol participants, |
| 15 |                |     | and who will assign participants to interventions – N/A                 |
| 16 |                |     |                                                                         |
| 17 | Blinding       | 17a | Who will be blinded after assignment to interventions (eg, trial        |
| 18 | (masking)      |     | participants, care providers, outcome assessors, data analysts), and    |
| 19 |                |     | how N/A                                                                 |
| 20 |                |     |                                                                         |
| 21 |                | 17b | If blinded, circumstances under which unblinding is permissible, and    |
| 22 |                |     | procedure for revealing a participant's allocated intervention during   |
| 23 |                |     | the trial – N/A                                                         |
| 24 |                |     |                                                                         |
| 25 |                |     |                                                                         |

### Methods: Data collection, management, and analysis

|    |                 |     |                                                                          |
|----|-----------------|-----|--------------------------------------------------------------------------|
| 26 |                 |     |                                                                          |
| 27 |                 |     |                                                                          |
| 28 | Data collection | 18a | Plans for assessment and collection of outcome, baseline, and other      |
| 29 | methods         |     | trial data, including any related processes to promote data quality (eg, |
| 30 |                 |     | duplicate measurements, training of assessors) and a description of      |
| 31 |                 |     | study instruments (eg, questionnaires, laboratory tests) along with      |
| 32 |                 |     | their reliability and validity, if known. Reference to where data        |
| 33 |                 |     | collection forms can be found, if not in the protocol – Pages 10-14,     |
| 34 |                 |     | Supplementary file                                                       |
| 35 |                 |     |                                                                          |
| 36 |                 | 18b | Plans to promote participant retention and complete follow-up,           |
| 37 |                 |     | including list of any outcome data to be collected for participants who  |
| 38 |                 |     | discontinue or deviate from intervention protocols – Page 9              |
| 39 |                 |     | (withdrawals)                                                            |
| 40 |                 |     |                                                                          |
| 41 |                 |     |                                                                          |
| 42 | Data            | 19  | Plans for data entry, coding, security, and storage, including any       |
| 43 | management      |     | related processes to promote data quality (eg, double data entry;        |
| 44 |                 |     | range checks for data values). Reference to where details of data        |
| 45 |                 |     | management procedures can be found, if not in the protocol – Page        |
| 46 |                 |     | 14                                                                       |
| 47 |                 |     |                                                                          |
| 48 | Statistical     | 20a | Statistical methods for analysing primary and secondary outcomes.        |
| 49 | methods         |     | Reference to where other details of the statistical analysis plan can be |
| 50 |                 |     | found, if not in the protocol – Page 15-16                               |
| 51 |                 |     |                                                                          |
| 52 |                 | 20b | Methods for any additional analyses (eg, subgroup and adjusted           |
| 53 |                 |     | analyses) – Page 16 (screening tool development and validation)          |
| 54 |                 |     |                                                                          |
| 55 |                 |     |                                                                          |
| 56 |                 |     |                                                                          |
| 57 |                 |     |                                                                          |
| 58 |                 |     |                                                                          |
| 59 |                 |     |                                                                          |
| 60 |                 |     |                                                                          |

1  
2  
3  
4  
5  
6  
7  
8  
9  
10  
11  
12  
13  
14  
15  
16  
17  
18  
19  
20  
21  
22  
23  
24  
25  
26  
27  
28  
29  
30  
31  
32  
33  
34  
35  
36  
37  
38  
39  
40  
41  
42  
43  
44  
45  
46  
47  
48  
49  
50  
51  
52  
53  
54  
55  
56  
57  
58  
59  
60

20c Definition of analysis population relating to protocol non-adherence (eg, as randomised analysis), and any statistical methods to handle missing data (eg, multiple imputation) – Page 15 (imputation)

### Methods: Monitoring

Data monitoring 21a Composition of data monitoring committee (DMC); summary of its role and reporting structure; statement of whether it is independent from the sponsor and competing interests; and reference to where further details about its charter can be found, if not in the protocol. Alternatively, an explanation of why a DMC is not needed – N/A

21b Description of any interim analyses and stopping guidelines, including who will have access to these interim results and make the final decision to terminate the trial – N/A

Harms 22 Plans for collecting, assessing, reporting, and managing solicited and spontaneously reported adverse events and other unintended effects of trial interventions or trial conduct – N/A

Auditing 23 Frequency and procedures for auditing trial conduct, if any, and whether the process will be independent from investigators and the sponsor – N/A

### Ethics and dissemination

Research ethics approval 24 Plans for seeking research ethics committee/institutional review board (REC/IRB) approval – Pages 19-20

Protocol amendments 25 Plans for communicating important protocol modifications (eg, changes to eligibility criteria, outcomes, analyses) to relevant parties (eg, investigators, REC/IRBs, trial participants, trial registries, journals, regulators) – N/A

Consent or assent 26a Who will obtain informed consent or assent from potential trial participants or authorised surrogates, and how (see Item 32) – Pages 9-10

26b Additional consent provisions for collection and use of participant data and biological specimens in ancillary studies, if applicable – N/A

Confidentiality 27 How personal information about potential and enrolled participants will be collected, shared, and maintained in order to protect confidentiality before, during, and after the trial – Page 14

Declaration of interests 28 Financial and other competing interests for principal investigators for the overall trial and each study site – Page 25

Access to data 29 Statement of who will have access to the final trial dataset, and disclosure of contractual agreements that limit such access for investigators – Not present

|    |                   |     |                                                                              |
|----|-------------------|-----|------------------------------------------------------------------------------|
| 1  |                   |     |                                                                              |
| 2  | Ancillary and     | 30  | Provisions, if any, for ancillary and post-trial care, and for               |
| 3  | post-trial care   |     | compensation to those who suffer harm from trial participation – N/A         |
| 4  |                   |     |                                                                              |
| 5  | Dissemination     | 31a | Plans for investigators and sponsor to communicate trial results to          |
| 6  | policy            |     | participants, healthcare professionals, the public, and other relevant       |
| 7  |                   |     | groups (eg, via publication, reporting in results databases, or other        |
| 8  |                   |     | data sharing arrangements), including any publication restrictions –         |
| 9  |                   |     | N/A                                                                          |
| 10 |                   |     |                                                                              |
| 11 |                   | 31b | Authorship eligibility guidelines and any intended use of professional       |
| 12 |                   |     | writers – N/A                                                                |
| 13 |                   |     |                                                                              |
| 14 |                   | 31c | Plans, if any, for granting public access to the full protocol, participant- |
| 15 |                   |     | level dataset, and statistical code – N/A                                    |
| 16 |                   |     |                                                                              |
| 17 | <b>Appendices</b> |     |                                                                              |
| 18 |                   |     |                                                                              |
| 19 | Informed consent  | 32  | Model consent form and other related documentation given to                  |
| 20 | materials         |     | participants and authorised surrogates – N/A                                 |
| 21 |                   |     |                                                                              |
| 22 | Biological        | 33  | Plans for collection, laboratory evaluation, and storage of biological       |
| 23 | specimens         |     | specimens for genetic or molecular analysis in the current trial and for     |
| 24 |                   |     | future use in ancillary studies, if applicable – N/A                         |
| 25 |                   |     |                                                                              |

---

26 \*It is strongly recommended that this checklist be read in conjunction with the SPIRIT 2013  
 27 Explanation & Elaboration for important clarification on the items. Amendments to the  
 28 protocol should be tracked and dated. The SPIRIT checklist is copyrighted by the SPIRIT  
 29 Group under the Creative Commons "[Attribution-NonCommercial-NoDerivs 3.0 Unported](https://creativecommons.org/licenses/by-nc-nd/3.0/)"  
 30 license.  
 31  
 32  
 33  
 34  
 35  
 36  
 37  
 38  
 39  
 40  
 41  
 42  
 43  
 44  
 45  
 46  
 47  
 48  
 49  
 50  
 51  
 52  
 53  
 54  
 55  
 56  
 57  
 58  
 59  
 60
